# Supplementary material for: Hemogram data as a tool for decision-making in COVID-19 management: applications to resource scarcity scenarios
Source: PeerJ. 2020 Jun 29;8:e9482. doi: 10.7717/peerj.9482 (PMC7331623; doi:10.7717/peerj.9482)
Supplement: Supplemental Information 1 — Original data was provided by a third party (Albert Einstein Hospital, São Paulo, Brazil) and it is available online at https://www.kaggle.com/einsteindata4u/covid19. [file peerj-08-9482-s001.xlsx]

## Sheet: All
Patient ID	Patient age quantile	SARS-Cov-2 exam result	Patient addmited to regular ward (1=yes, 0=no)	Patient addmited to semi-intensive unit (1=yes, 0=no)	Patient addmited to intensive care unit (1=yes, 0=no)	Hematocrit	Hemoglobin	Platelets	Mean platelet volume	Red blood Cells	Lymphocytes	Mean corpuscular hemoglobin concentration (MCHC)	Leukocytes	Basophils	Mean corpuscular hemoglobin (MCH)	Eosinophils	Mean corpuscular volume (MCV)	Monocytes	Red blood cell distribution width (RDW)	Serum Glucose	Respiratory Syncytial Virus	Influenza A	Influenza B	Parainfluenza 1	CoronavirusNL63	Rhinovirus/Enterovirus	Mycoplasma pneumoniae	Coronavirus HKU1	Parainfluenza 3	Chlamydophila pneumoniae	Adenovirus	Parainfluenza 4	Coronavirus229E	CoronavirusOC43	Inf A H1N1 2009	Bordetella pertussis	Metapneumovirus	Parainfluenza 2	Neutrophils	Urea	Proteina C reativa mg/dL	Creatinine	Potassium	Sodium	Influenza B, rapid test	Influenza A, rapid test	Alanine transaminase	Aspartate transaminase	Gamma-glutamyltransferase
44477f75e8169d2	13	negative	0	0	0
126e9dd13932f68	17	negative	0	0	0	0.236515	-0.0223403	-0.517413	0.0106766	0.102004	0.318366	-0.95079	-0.0946103	-0.223767	-0.292269	1.48216	0.166192	0.357547	-0.625073	-0.140648	not_detected	not_detected	not_detected	not_detected	not_detected	detected		not_detected	not_detected	not_detected	not_detected	not_detected	not_detected	not_detected	not_detected	not_detected	not_detected	not_detected	-0.619086	1.19806	-0.147895	2.08993	-0.305787	0.862512	negative	negative
a46b4402a0e5696	8	negative	0	0	0
f7d619a94f97c45	5	negative	0	0	0
d9e41465789c2b5	15	negative	0	0	0																not_detected	not_detected	not_detected	not_detected	not_detected	detected		not_detected	not_detected	not_detected	not_detected	not_detected	not_detected	not_detected	not_detected	not_detected	not_detected	not_detected
75f16746216c4d1	9	negative	0	0	0
2a2245e360808d7	13	negative	0	0	0
509197ec73f1400	16	negative	0	0	0
8bb9d64f0215244	1	negative	0	1	0	-1.57168	-0.774212	1.42967	-1.67222	-0.850035	-0.00573804	3.33107	0.36455	-0.223767	0.178175	1.01863	-1.33602	0.0686515	-0.978899	-0.413208	not_detected	not_detected	not_detected	not_detected	not_detected	not_detected		not_detected	not_detected	not_detected	not_detected	not_detected	not_detected	not_detected	not_detected	not_detected	not_detected	not_detected	-0.127395	-0.0673088	-0.286986	-1.83862	0.93002	0.503132			-0.586821	-0.1622
5f1ed301375586c	17	negative	0	0	0																not_detected	not_detected	not_detected	not_detected	not_detected	not_detected		not_detected	not_detected	not_detected	not_detected	not_detected	not_detected	not_detected	not_detected	not_detected	not_detected	not_detected
d720464cc322b6f	8	negative	0	0	0
02c84e61d5f9e18	1	negative	0	0	0
b68a6f32fd88a49	1	negative	0	0	0
0fbafd910aa8078	13	negative	0	0	0																not_detected	not_detected	not_detected	not_detected	not_detected	not_detected		not_detected	not_detected	not_detected	not_detected	not_detected	not_detected	not_detected	not_detected	not_detected	not_detected	not_detected
f9056545d1296ec	14	negative	0	0	0																not_detected	not_detected	not_detected	not_detected	not_detected	not_detected		not_detected	not_detected	not_detected	not_detected	not_detected	not_detected	not_detected	not_detected	not_detected	not_detected	not_detected
6c9d3323975b082	9	negative	0	0	0	-0.747693	-0.586244	-0.42948	-0.213711	-1.36132	-1.11451	0.542882	-0.884923	0.0816925	1.74632	-0.66695	1.66841	1.27676	-1.06736		not_detected	not_detected	not_detected	not_detected	not_detected	not_detected		not_detected	not_detected	not_detected	not_detected	not_detected	not_detected	not_detected	detected	not_detected	not_detected	not_detected	0.88057	-0.811643		-0.908177	0.435697	-0.215628	negative	positive	-0.559257	-0.549287
b62e45a8a3f683e	15	negative	0	0	0
99da3c055438133	13	negative	0	0	0
d3ea751f3db9de9	11	negative	0	0	0	0.991838	0.792188	0.072992	-0.55029	0.542763	0.0454363	-0.452899	-0.211488	-0.834685	0.334989	-0.70909	0.606842	-0.220244	0.171035		not_detected	not_detected	not_detected	not_detected	not_detected	detected		not_detected	not_detected	not_detected	not_detected	not_detected	not_detected	not_detected	not_detected	not_detected	not_detected	not_detected	0.265957		-0.487674
315cc65959223e0	9	negative	0	0	0																																								negative	negative
fe656baa2bfc5dd	0	negative	0	0	0																detected	not_detected	not_detected	not_detected	not_detected	not_detected		not_detected	not_detected	not_detected	not_detected	not_detected	not_detected	not_detected	not_detected	not_detected	not_detected	not_detected							negative	negative
93b8a7ad37b1400	17	negative	0	0	0
2c2eae16c12a18a	9	negative	0	0	0	0.190738	-0.147652	-0.668155	1.02042	-0.127191	0.00279103	-1.24952	-1.13259	0.387152	-0.0831831	-0.70909	0.566783	2.01213	0.613318	-0.837191																			-0.42241	-1.33268		-0.908177	-0.552949	-0.575008	negative	negative
59b54b15e19da77	9	negative	0	0	0
d153a96599e2d41	13	negative	0	0	0
6b43d02183a4e72	3	negative	0	0	0																not_detected	not_detected	not_detected
fe26809ebb6ef44	11	negative	0	0	0
50abe42feb0b703	11	negative	0	0	0
fc41531ca4faf1e	13	negative	0	0	0	1.01473	0.854844	-0.178244	0.796029	0.489872	-0.730707	-0.353319	-0.0751308	2.52537	0.544077	0.217977	0.767079	0.0686515	0.171035		not_detected	not_detected	not_detected	not_detected	not_detected	detected		not_detected	not_detected	not_detected	not_detected	not_detected	not_detected	not_detected	not_detected	not_detected	not_detected	not_detected	0.651115	-0.737209	-0.434025	-0.701411
891d0f6449ff3d7	14	negative	0	0	0	0.740064	0.854844	0.361914	-0.55029	0.436981	-0.227493	0.642463	0.105751	-0.529226	0.596348	-0.371974	0.386517	0.121178	-0.713529		not_detected	not_detected	not_detected	not_detected	not_detected	not_detected		not_detected	not_detected	not_detected	not_detected	not_detected	not_detected	not_detected	not_detected	not_detected	not_detected	not_detected	0.347905	-0.141742	-0.529401	0.332418
ebdd7c67fcb21b4	9	negative	1	0	0	-0.679027	-0.711556	0.952319	-0.886869	-0.321124	-0.875701	-0.253742	-0.286623	-0.223767	-0.710443	-0.540532	-0.67505	0.804021	-0.890442	-0.413208	not_detected	not_detected	detected	not_detected	not_detected	not_detected		not_detected	not_detected	not_detected	not_detected	not_detected	not_detected	not_detected	not_detected	not_detected	not_detected	not_detected	0.782232	-0.439476	0.545572	1.02164	0.435697	-1.65315	negative	negative
554ce78d5936fe8	13	negative	0	0	0
296adf066a9bf03	8	negative	0	0	0	0.236515	0.040316	0.072992	0.571643	0.0667435	1.2395	-0.652057	-0.545423	0.99807	-0.0831831	0.133698	0.246311	-0.482876	-0.0943343		not_detected	not_detected	not_detected	not_detected	not_detected	not_detected		not_detected	not_detected	not_detected	not_detected	not_detected	not_detected	not_detected	not_detected	not_detected	not_detected	not_detected	-1.01244	-0.513909		-0.391262	0.93002	0.143752
6da0fb1799dbf57	17	negative	0	0	0																not_detected	not_detected	not_detected	not_detected	not_detected	not_detected		not_detected	not_detected	not_detected	not_detected	not_detected	not_detected	not_detected	not_detected	not_detected	not_detected	not_detected
0b1e43c5e3fb1d1	17	negative	0	0	0	0.80873	1.04281	-0.278739	1.58138	0.701437	-0.261609	1.04077	4.61877e-06	0.387152	0.439533	0.0494192	-0.0140739	-0.509139	-0.0943343		not_detected	not_detected	not_detected	not_detected	not_detected	detected		not_detected	not_detected	not_detected	not_detected	not_detected	not_detected	not_detected	not_detected	not_detected	not_detected	not_detected	0.470828		-0.360505
39bfa1be6de588e	3	negative	0	0	0
c0aa8a22eaccb63	14	negative	0	0	0	-0.106813	-0.33562	1.42967	-0.213711	-0.60321	0.326895	-0.95079	0.726313	0.0816925	0.544077	-0.540532	1.08755	0.0686515	0.436405																				-0.15198		-0.519466
a1bd3d591a72633	10	negative	0	0	0
826f654dbf80245	16	negative	0	0	0	1.42672	1.23078	0.600588	-1.11126	1.26561	0.506005	-0.353319	-0.0222577	0.692611	-0.187727	-0.371974	-0.0341032	-0.509139	0.0825793																				-0.192954	0.453725	-0.414154	-0.563567
2e1cada13fa6439	6	negative	0	0	0																not_detected	not_detected	not_detected	not_detected	not_detected	not_detected		not_detected	not_detected	not_detected	not_detected	not_detected	not_detected	not_detected	not_detected	not_detected	not_detected	not_detected
a2432a45830c32d	15	negative	0	0	0	0.717175	0.60422	0.399599	0.683835	0.40172	0.0113201	-0.253742	-0.178094	0.387152	0.282719	-0.161278	0.426576	0.593916	-0.0058775																				-0.0946162		-0.354544				negative	negative	-0.476563	-0.47187
18033e288631304	12	negative	0	0	0																																								negative	positive
27b26b840b56278	6	negative	0	0	0
0f91de4ee066dbb	3	negative	0	0	0
c6da0f9185a0d3d	6	negative	0	0	0
62e504c6781b50e	16	negative	0	0	0
5c39241fdb4d9c7	13	negative	0	0	0
56112eca73447bf	19	negative	0	0	0
08bafb971c192a4	11	negative	0	0	0
adb014b831971bd	11	negative	0	0	0
11e4956b770f080	17	negative	0	0	0	1.01473	0.666876	-0.203368	0.459449	0.295938	-0.261609	-0.95079	-0.0834792	-0.223767	0.544077	0.133698	1.16767	-0.246507	-0.359703	-0.564631	not_detected	not_detected	not_detected	not_detected	detected	not_detected		not_detected	not_detected	not_detected	not_detected	not_detected	not_detected	not_detected	not_detected	not_detected	not_detected	not_detected	0.388879	0.825892	-0.461843	2.12439	-0.80011	0.862512			-0.366304	-0.510579	-0.207071
7feee6750421bec	7	negative	0	0	0	0.946061	1.16812	-0.278739	0.0106766	1.17746	-0.671003	1.04077	0.133579	0.692611	-0.135455	-0.540532	-0.655019	-0.0889278	-0.44816	-0.170933																			0.839596	-0.439476	0.011066	1.29733	0.188535	0.143752			-0.28361	-0.200909	-0.296916
805b09474eca023	11	negative	0	0	0
9abc76405794c6d	9	negative	0	0	0																																								positive	negative
e8cf187db036a5d	17	negative	0	0	0																																								negative	negative
ac357896cbf35fc	19	negative	0	1	0	0.625621	0.353596	-0.127997	0.796029	0.190156	-1.59214	-0.85121	0.556563	0.0816925	0.230447	-0.624811	0.686961	-0.614192	-0.359703	0.85874	not_detected	not_detected	not_detected	not_detected	not_detected	not_detected		not_detected	not_detected	not_detected	not_detected	not_detected	not_detected	not_detected	detected	not_detected	not_detected	not_detected	1.92132	-0.737209	0.611144	-0.494645	-1.54159	0.862512			-0.448998	-0.278326	-0.319378
851d695bbc1f684	6	negative	0	0	0	-0.15259	-0.460932	1.24124	-1.56003	-0.250603	-0.0654413	-1.24952	1.19661	-0.529226	-0.396813	-0.540532	0.186222	-0.692982	0.259492																				0.479023		-0.451908				negative	negative
1037fbd45aa414b	18	negative	0	0	0
11eb4822da4049b	17	negative	0	0	0
dde616ba4d00c83	10	negative	0	0	0	0.190738	0.040316	-1.05757	0.235063	-0.462168	-1.26804	-0.552476	1.22443	-0.529226	0.962249	-0.793368	1.34794	0.488863	-0.713529	-0.201217	not_detected	not_detected	not_detected	not_detected	not_detected	not_detected		not_detected	not_detected	not_detected	not_detected	not_detected	not_detected	not_detected	not_detected	not_detected	not_detected	not_detected	1.3149	-0.365042	2.25639	0.470262	-0.0586259	-0.215628
7b5a92d3f15a7a3	15	negative	0	0	0
6b9fb21966025cd	11	negative	0	0	0	0.740064	0.60422	0.160925	0.908221	-0.0214086	-0.329842	-0.353319	0.225411	-0.223767	1.06679	-0.0769989	1.36797	0.357547	-0.359703	-0.413208	not_detected	not_detected	not_detected	not_detected	not_detected	not_detected		not_detected	not_detected	not_detected	not_detected	not_detected	not_detected	not_detected	not_detected	not_detected	not_detected	not_detected	0.306931	-0.141742	-0.495622	0.0222695	-0.305787	1.58127
2e90e489408ca11	11	negative	0	0	0	0.740064	0.541564	-0.0651879	0.683835	-0.215342	0.966573	-0.552476	0.350636	0.0816925	1.32815	0.555092	1.80862	-0.0889278	0.790231	-0.473777	not_detected	not_detected	not_detected	not_detected	not_detected	detected		not_detected	not_detected	not_detected	not_detected	not_detected	not_detected	not_detected	not_detected	not_detected	not_detected	not_detected	-0.93049	-0.141742	-0.475752	-0.529106	-0.80011	1.58127			-0.559257	-0.47187	-0.341839
6a6c46ca5bb815b	0	negative	0	0	0																not_detected	not_detected	not_detected	not_detected	not_detected	detected		not_detected	not_detected	not_detected	not_detected	not_detected	not_detected	not_detected	not_detected	not_detected	not_detected	not_detected
2ac3e96f6ee01b3	14	negative	0	0	0
5b5cbc4821759d2	3	negative	0	0	0
d3713e30ce6a902	7	negative	0	0	0
78511c183ae18bc	7	positive	0	0	0
fc97885c5a81851	2	negative	0	0	0																																								negative	negative
5624291313277ad	17	negative	1	0	0																not_detected	not_detected	not_detected	not_detected	not_detected	not_detected		not_detected	not_detected	not_detected	not_detected	not_detected	not_detected	not_detected	not_detected	not_detected	not_detected	not_detected
fea9fa5b8bca4bf	4	negative	0	0	0
01d324f278f3101	16	negative	0	0	0	0.671398	0.29094	0.135801	0.0106766	0.525133	0.173372	-1.24952	-0.653951	0.0816925	-0.501356	-0.624811	0.0860739	1.2505	-0.18279	-0.564631	not_detected	not_detected	detected	not_detected	not_detected	not_detected		not_detected	not_detected	not_detected	not_detected	not_detected	not_detected	not_detected	not_detected	not_detected	not_detected	not_detected	-0.356851		-0.316791	0.194574	2.41299	0.862512	positive	negative
3c3cbfeade87171	2	negative	0	0	0																not_detected	not_detected	not_detected	not_detected	not_detected	not_detected		not_detected	not_detected	not_detected	not_detected	not_detected	not_detected	not_detected	detected	not_detected	not_detected	not_detected
7d6025a8c3c4314	6	negative	0	0	0	-0.221256	-0.0849959	0.261419	1.35699	-0.162451	-0.0313251	0.542882	-0.509246	-0.529226	0.125903	-0.161278	-0.134251	0.777758	-0.890442																				-0.0864211		-0.521453
bea27afbfb4bca9	13	negative	0	0	0																not_detected	not_detected	not_detected	not_detected	not_detected	not_detected		not_detected	not_detected	not_detected	not_detected	not_detected	not_detected	not_detected	detected	not_detected	not_detected	not_detected
09f002b73e6c09f	7	negative	0	0	0
31f759d425f49d9	1	negative	0	0	0																not_detected	not_detected	not_detected	not_detected	not_detected	not_detected		not_detected	not_detected	not_detected	not_detected	not_detected	not_detected	not_detected	detected	not_detected	not_detected	not_detected							negative	positive
b81022b12030b2f	15	negative	0	0	0
4d29d75c62d7c48	1	negative	0	0	0	-0.816359	-0.836868	0.763892	-1.56003	-0.656101	-1.37039	-0.253742	1.6669	-0.529226	-0.344541	-0.793368	-0.214369	-0.666718	-1.06736																				1.77381		1.72784
a8831f6e5e7a282	12	negative	0	0	0																not_detected	detected	not_detected	not_detected	not_detected	not_detected		not_detected	not_detected	not_detected	not_detected	not_detected	not_detected	not_detected	not_detected	not_detected	not_detected	not_detected							negative	negative
8bdcce6ffdc9781	6	negative	0	0	0																																								negative	positive
19190e1e9764d10	13	negative	0	0	0
efcff3d662b928a	9	negative	0	0	0
629cd11ce442894	15	negative	0	0	0																not_detected	not_detected	not_detected	not_detected	not_detected	not_detected		not_detected	not_detected	not_detected	not_detected	not_detected	not_detected	not_detected	not_detected	not_detected	not_detected	not_detected							negative	negative
54ea170f12c4e76	9	negative	0	0	0	-0.656139	-0.899524	-0.391795	0.796029	-0.409276	1.86212	-1.14995	-0.681779	-0.529226	-0.919529	0.0915587	-0.434694	-0.0101382	0.171035		not_detected	not_detected	not_detected	not_detected	not_detected	not_detected		not_detected	not_detected	not_detected	not_detected	not_detected	not_detected	not_detected	not_detected	not_detected	detected	not_detected	-1.709		-0.519466				negative	negative
3998fc2c74f6f61	4	negative	0	0	0
ecaa8e290af8461	19	negative	0	1	0	-0.518807	-0.586244	0.952319	0.0106766	-0.144821	0.429243	-0.353319	-0.748566	1.30353	-0.814985	1.69286	-0.735138	0.488863	-0.0058775		not_detected	not_detected	not_detected	not_detected	not_detected	detected		not_detected	not_detected	not_detected	not_detected	not_detected	not_detected	not_detected	not_detected	not_detected	not_detected	not_detected	-0.848542	1.19806	-0.283012	-0.873716	0.93002	0.503132			-0.531692	-0.510579
26000ea3dba0de1	17	negative	0	0	0	0.442512	0.228284	-0.680717	0.459449	0.736697	-1.16569	-0.652057	-0.589947	-0.529226	-0.919529	-0.624811	-0.715108	-0.456613	0.0825793	-0.382924	not_detected	not_detected	not_detected	not_detected	not_detected	not_detected		not_detected	not_detected	not_detected	not_detected	not_detected	not_detected	not_detected	detected	not_detected	not_detected	not_detected	1.47879	-0.365042	-0.404219	0.573645	-1.04727	-0.215628	negative	negative	1.14975	-0.239617	-0.285685
05a19022f67b614	10	negative	0	0	0	-0.541696	-0.398276	-0.454604	-0.55029	-0.779514	-1.27657	0.443306	0.236542	-0.223767	0.753163	-0.793368	0.626871	-0.640455	-0.713529		not_detected	not_detected	not_detected	not_detected	not_detected	not_detected		not_detected	not_detected	not_detected	not_detected	not_detected	not_detected	not_detected	detected	not_detected	not_detected	not_detected	1.66728	-1.03494	-0.243271	-0.977099			negative	negative
892c576858dea6c	3	negative	0	0	0
f539a2ec383e569	3	negative	0	0	0
bf7437894ab1761	2	negative	0	0	0																																								negative	negative
da2308f093923ff	2	negative	0	0	0																																								negative	positive
3f6ffa81078d008	17	negative	0	0	0																																								negative	negative
b5a50e6fed2f1f8	2	negative	0	0	0																not_detected	not_detected	not_detected	not_detected	detected	not_detected		not_detected	not_detected	not_detected	not_detected	not_detected	not_detected	not_detected	not_detected	not_detected	not_detected	not_detected
078780a7f821654	18	negative	0	0	0	0.946061	0.854844	-0.718402	0.908221	0.36646	0.540121	-0.0545852	-1.03241	0.387152	0.753163	0.260116	0.907285	0.0161249	-0.359703																				-0.504358	0.155991	-0.461843	0.573645	-0.0586259	0.143752
74bbf11f60b9a02	0	negative	0	0	0																not_detected	not_detected	not_detected	not_detected	not_detected	not_detected		not_detected	not_detected	not_detected	not_detected	not_detected	not_detected	not_detected	not_detected	not_detected	detected	not_detected
85869b45101484f	17	negative	0	0	0
64e165aaf27eb4e	15	negative	0	0	0
ac9829b1fd66118	16	negative	0	0	0
89a018cf78cf0d4	17	negative	0	0	0
fb23f6f417a44d0	2	negative	0	0	0
3a9b5df86ac8b3b	4	negative	0	0	0
dcccca75afd27d0	2	negative	0	0	0
1ed89bd1e4241d5	9	negative	0	0	0
78d01232e2445f5	15	negative	0	0	0	-0.450142	-0.460932	-0.542537	1.13261	-0.779514	-0.671003	-0.154166	-1.13816	-1.14014	0.648619	-0.835508	0.807138	-0.220244	-0.0058775		not_detected	not_detected	not_detected	not_detected	not_detected	detected		not_detected	not_detected	not_detected	not_detected	not_detected	not_detected	detected	not_detected	not_detected	not_detected	not_detected		-0.96051	-0.489661	-0.632489			negative	negative
3e4588f1d11c373	14	negative	0	0	0	1.22072	1.35609	0.500094	-0.55029	1.68874	0.463359	0.74204	1.15208	-0.834685	-0.658171	-0.203417	-1.09567	0.436336	0.0825793		not_detected	not_detected	not_detected	not_detected	not_detected	detected		not_detected	not_detected	not_detected	not_detected	not_detected	not_detected	not_detected	not_detected	not_detected	not_detected	not_detected	-0.4388	-0.290609	0.650884	0.539184	1.17718	-1.29377			0.212554	-0.355744
727c6689e9b0cf2	9	negative	0	0	0	0.282293	0.29094	0.273981	-0.438097	0.489872	-1.31921	0.144572	-0.595513	0.387152	-0.396813	-0.329835	-0.514813	0.0161249	-0.0058775		not_detected	not_detected	not_detected	not_detected	not_detected	not_detected		not_detected	not_detected	not_detected	not_detected	not_detected	not_detected	not_detected	not_detected	not_detected	not_detected	not_detected	1.39685		-0.243271				negative	negative
733a6850e89b1df	12	negative	0	0	0	0.694287	0.729532	-0.341548	-1.11126	0.40172	0.693644	0.343725	-0.428545	-1.14014	0.491805	0.00727989	0.386517	-1.79604	0.171035																						0.750234				negative	negative
b2fb9312efbadc1	9	negative	0	0	0																not_detected	not_detected	detected	not_detected	not_detected	not_detected		not_detected	not_detected	not_detected	not_detected	not_detected	not_detected	not_detected	not_detected	not_detected	not_detected	not_detected							positive	negative
a4b2116e0689f54	0	negative	0	0	1	-0.862136	-0.6489	1.63066	0.347255	-1.25553	2.92825	0.74204	-0.431328	-0.529226	1.32815	1.56644	1.12761	1.01413	1.6748	-0.322355	not_detected	not_detected	not_detected	not_detected	not_detected	not_detected		not_detected	not_detected	not_detected	not_detected	not_detected	not_detected	not_detected	not_detected	not_detected	not_detected	not_detected	-3.33977		-0.265129
14e1396e52ac362	10	negative	1	0	0	0.579844	0.854844	-0.668155	-0.438097	0.842479	-0.381016	1.14035	-0.659517	0.0816925	-0.0831831	-0.835508	-0.67505	-0.0889278	0.259492	0.0410588																			0.634725	0.081558	-0.149882	1.53855	0.93002	-0.934388	negative	positive
e07b6212e3dcf09	16	negative	1	0	0	0.0305179	-0.0849959	-0.203368	-0.999063	0.295938	-0.892759	-0.452899	0.00835292	0.0816925	-0.710443	0.260116	-0.594931	0.830284	0.347948		not_detected	not_detected	not_detected	not_detected	not_detected	not_detected		not_detected	not_detected	not_detected	not_detected	not_detected	not_detected	not_detected	not_detected	not_detected	not_detected	not_detected	0.62653	0.081558	2.19877	1.12502	0.435697	-0.575008			0.377942	-0.0847824	0.0175434
75594d65927dbc8	3	negative	0	0	0																not_detected	not_detected	not_detected	not_detected	not_detected	detected		not_detected	not_detected	not_detected	not_detected	not_detected	not_detected	not_detected	not_detected	not_detected	not_detected	not_detected
4cc24d7d4dec4e4	4	negative	0	0	0																not_detected	not_detected	not_detected	not_detected	not_detected	not_detected		not_detected	not_detected	not_detected	not_detected	not_detected	not_detected	not_detected	not_detected	not_detected	not_detected	not_detected							negative	negative
b550f7806698097	17	negative	0	0	0	-0.0381476	-0.147652	-0.404357	-0.213711	-0.0390385	-0.363958	-0.452899	-1.02406	0.387152	-0.239998	-0.245556	-0.0341032	0.0423882	-0.0058775	-0.504062	not_detected	not_detected	detected	not_detected	not_detected	detected		not_detected	not_detected	not_detected	not_detected	not_detected	not_detected	not_detected	not_detected	not_detected	not_detected	not_detected	0.454439	-0.811643	-0.320765	-0.598028	-1.54159	0.503132
72a8d3ef7ff6448	0	negative	0	0	0																																								negative	positive
6e22f9edffeb9b1	0	negative	0	0	0																not_detected	not_detected	not_detected	not_detected	not_detected	not_detected		not_detected	not_detected	not_detected	not_detected	not_detected	not_detected	not_detected	not_detected	not_detected	not_detected	not_detected
7926784769fec53	8	negative	0	0	0																not_detected	not_detected	not_detected	not_detected	not_detected	not_detected		not_detected	not_detected	not_detected	not_detected	not_detected	not_detected	not_detected	not_detected	not_detected	not_detected	not_detected
4a8cdfbf4387bd9	8	negative	0	0	0																not_detected	not_detected	not_detected	not_detected	not_detected	not_detected		not_detected	not_detected	not_detected	not_detected	not_detected	not_detected	not_detected	detected	not_detected	not_detected	not_detected
43014e3af887219	11	negative	0	0	0
f55c4a680fc2988	14	negative	0	0	0
555169a68be1b91	7	negative	0	0	0
34e17c029bba5a5	18	negative	0	0	0
f523aaa4eebb5df	12	negative	0	0	0																not_detected	not_detected	not_detected	not_detected	not_detected	detected		not_detected	not_detected	not_detected	not_detected	not_detected	not_detected	not_detected	not_detected	not_detected	not_detected	not_detected							negative	negative
97b4c518cc8db2a	19	negative	0	0	0
0f8e965c0800151	19	negative	0	0	0	-1.29702	-1.2128	0.173487	0.235063	-1.80207	-0.543068	0.0449914	1.70307	0.0816925	1.48497	-0.287696	1.66841	1.27676	-0.44816	0.343903	not_detected	not_detected	not_detected	not_detected	not_detected	not_detected		not_detected	not_detected	not_detected	not_detected	not_detected	not_detected	not_detected	not_detected	not_detected	not_detected	not_detected	0.257762	-0.216176	1.84309	-0.735872	-0.0586259	0.143752			-0.118222	-0.394452	0.421849
5c56087861a9b73	0	negative	1	0	0																not_detected	not_detected	not_detected	not_detected	not_detected	not_detected		not_detected	not_detected	not_detected	not_detected	not_detected	not_detected	not_detected	not_detected	not_detected	not_detected	not_detected
ad3fcc7c35a9257	2	negative	0	0	0	-1.98368	-1.96468	-0.756087	0.347255	-1.37895	0.949515	-0.452899	0.0834884	-1.14014	-1.12862	-0.835508	-1.03558	-0.745508	0.436405	1.1313	not_detected	not_detected	not_detected	not_detected	not_detected	detected		not_detected	not_detected	not_detected	not_detected	not_detected	not_detected	not_detected	not_detected	not_detected	not_detected	not_detected		-0.886076	-0.239297	-1.42509	-1.04727	-0.575008	negative	negative	0.295248	-0.0460737	-0.3643
c41b27d71b3c7fb	18	negative	0	0	0																not_detected	not_detected	not_detected	not_detected	not_detected	not_detected		detected	not_detected	not_detected	not_detected	not_detected	not_detected	not_detected	not_detected	not_detected	not_detected	not_detected
3c5a9e58b6d4fe2	17	negative	0	0	0																not_detected	not_detected	not_detected	not_detected	detected	not_detected		not_detected	not_detected	not_detected	not_detected	not_detected	not_detected	not_detected	not_detected	not_detected	not_detected	not_detected
e623ec08f1bfcc3	4	negative	0	0	0
2d1b43a9e2ef061	9	negative	0	0	0
33fd6f1c08760a1	17	negative	0	0	0	1.03762	0.854844	-0.354109	-0.662483	0.278308	-0.628358	-0.452899	-0.0417373	-0.834685	0.909977	-0.0769989	1.24779	0.278757	0.259492		not_detected	not_detected	not_detected	not_detected	not_detected	not_detected		not_detected	not_detected	not_detected	not_detected	not_detected	not_detected	not_detected	not_detected	not_detected	not_detected	not_detected	0.634725	0.751459	-0.511518	0.366879	0.682859	-0.575008	negative	negative
1bee2bf650a4c67	1	negative	0	0	0																not_detected	not_detected	not_detected	not_detected	detected	not_detected		not_detected	not_detected	not_detected	not_detected	not_detected	not_detected	not_detected	not_detected	not_detected	not_detected	not_detected
826c297bdd9a2c3	16	negative	0	0	0																not_detected	not_detected	not_detected	not_detected	not_detected	not_detected		not_detected	not_detected	not_detected	not_detected	not_detected	not_detected	not_detected	not_detected	not_detected	not_detected	not_detected
d2d249ae0ed3ce6	16	negative	0	0	0	1.03762	1.04281	-0.115435	0.0106766	0.613284	-0.79041	0.244149	-0.4035	-0.529226	0.596348	-0.498393	0.546754	1.27676	-0.536617		not_detected	not_detected	not_detected	not_detected	not_detected	not_detected		not_detected	not_detected	not_detected	not_detected	not_detected	not_detected	detected	not_detected	not_detected	not_detected	not_detected	0.552776	-0.588343	-0.219427	-0.218957			negative	negative
911a31b14407d91	1	negative	0	0	0																not_detected	not_detected	not_detected	not_detected	not_detected	not_detected		not_detected	not_detected	not_detected	not_detected	not_detected	not_detected	not_detected	not_detected	not_detected	not_detected	not_detected
a80b6695f9c2121	16	negative	0	0	0
3a66fd6adcccf79	11	negative	0	0	0																																								negative	negative
5fe79837106293a	4	negative	0	0	0																not_detected	not_detected	not_detected	not_detected	not_detected	not_detected		not_detected	not_detected	not_detected	not_detected	not_detected	not_detected	not_detected	not_detected	not_detected	not_detected	not_detected
7d51e9131db4a25	8	negative	0	0	0
0ff537094f1a305	3	negative	0	0	0																not_detected	not_detected	detected	not_detected	not_detected	not_detected		not_detected	not_detected	not_detected	not_detected	not_detected	not_detected	not_detected	not_detected	not_detected	not_detected	not_detected
6eb7cb571bdedaf	5	negative	0	0	0	2.09049	2.04531	-0.768649	1.46919	1.93556	-0.236022	0.244149	-0.211488	0.0816925	-0.0309113	-0.245556	-0.174311	2.2485	0.436405																				-0.348656	0.155991	-0.366466	0.987177			negative	negative
080c319fd91504b	1	negative	0	0	0																not_detected	not_detected	not_detected	not_detected	not_detected	not_detected		not_detected	not_detected	detected	not_detected	not_detected	not_detected	not_detected	detected	not_detected	not_detected	not_detected
1205a978ff0ef00	12	negative	0	0	0	-0.404364	-0.523588	-0.592784	-0.55029	-0.409276	0.0369072	-0.552476	0.0306152	-0.834685	-0.239998	1.1029	0.0460154	0.909074	0.524862	-1.04918	not_detected	not_detected	not_detected	not_detected	not_detected	detected		not_detected	not_detected	not_detected	not_detected	not_detected	not_detected	not_detected	not_detected	not_detected	not_detected	not_detected	-0.430605	-0.96051	-0.203531	-0.287879	-1.54159	1.58127	negative	negative	-0.200916	0.0313438	-0.274455
5cec97d33d17b8b	17	negative	0	0	0	0.762952	0.60422	-1.37162	1.80577	-0.197712	-1.5495	-0.353319	1.56393	-0.834685	1.43269	-0.793368	1.82864	-0.456613	0.0825793		not_detected	not_detected	not_detected	not_detected	not_detected	not_detected		not_detected	not_detected	not_detected	not_detected	not_detected	not_detected	not_detected	not_detected	not_detected	not_detected	not_detected	1.88854	-0.886076	0.891312	1.02164	0.188535	0.862512			-0.145786	-0.00736494	-0.251993
28eda3dd2dcf509	17	negative	0	0	0																																								negative	negative
538425f6a5669f8	18	negative	0	0	0																not_detected	not_detected	not_detected	not_detected	not_detected	detected		not_detected	not_detected	not_detected	not_detected	not_detected	not_detected	not_detected	not_detected	not_detected	not_detected	not_detected
034d996ebaea1bd	16	negative	0	0	0																not_detected	not_detected	not_detected	not_detected	not_detected	detected		not_detected	not_detected	not_detected	not_detected	not_detected	not_detected	not_detected	not_detected	not_detected	not_detected	not_detected
3db2c6a0e4f1034	2	negative	0	0	0																not_detected	not_detected	not_detected	not_detected	not_detected	detected		not_detected	not_detected	not_detected	not_detected	not_detected	not_detected	not_detected	not_detected	not_detected	not_detected	not_detected
65db26d3b1fa81b	2	negative	0	0	0
ecef5dfca43aa2e	1	negative	0	0	1																not_detected	not_detected	not_detected	not_detected	not_detected	not_detected		not_detected	not_detected	not_detected	not_detected	not_detected	not_detected	not_detected	detected	not_detected	not_detected	not_detected
eb5ef46a892698f	0	negative	0	0	0	-0.15259	-0.460932	1.06537	-0.438097	0.472242	3.7641	-1.24952	-0.0806963	-1.14014	-1.65133	-0.835508	-1.25591	-1.27077	0.613318		not_detected	not_detected	detected	not_detected	not_detected	not_detected		not_detected	not_detected	not_detected	not_detected	not_detected	not_detected	not_detected	not_detected	not_detected	detected	not_detected			-0.342622				positive	negative
56ae80c39903c80	12	negative	0	0	0	-0.518807	-0.398276	0.286543	0.571643	-0.356385	-1.73713	0.343725	-0.550988	-0.223767	-0.0831831	-0.203417	-0.294488	-0.325297	-0.18279	-0.6252																			1.89673	-0.513909		-0.494645	-0.552949	-0.934388	negative	negative	-0.448998	-0.47187
e3a4c56c79b380f	18	negative	0	0	0																not_detected	not_detected	not_detected	not_detected	not_detected	not_detected		not_detected	not_detected	not_detected	not_detected	not_detected	not_detected	not_detected	not_detected	not_detected	not_detected	not_detected
6baef18c73dc557	8	negative	0	0	0																not_detected	not_detected	not_detected	not_detected	not_detected	not_detected		not_detected	not_detected	not_detected	not_detected	not_detected	not_detected	not_detected	not_detected	not_detected	not_detected	not_detected
4746343cef59d41	9	negative	0	0	0																not_detected	not_detected	not_detected	not_detected	not_detected	detected		not_detected	not_detected	not_detected	not_detected	not_detected	not_detected	not_detected	not_detected	not_detected	not_detected	not_detected
b85f1bf1cc40e98	11	negative	0	0	0
a3673e4397f2e02	17	negative	0	0	0
750d84f0335172e	7	negative	0	0	0
2238b6d50789fb9	11	negative	0	0	0
55b7f369ddf1bd4	14	negative	0	0	0
fcac01d57bf6f01	2	negative	0	0	0
5b2cb165b886e64	2	negative	0	0	0
cea0091f8141d0a	4	negative	0	0	0
1b68036283d2bca	6	negative	0	0	0	1.49539	1.4814	-0.743526	0.796029	0.983522	-1.19128	0.244149	-0.0111265	-0.834685	0.648619	-0.287696	0.606842	0.278757	-0.271247		not_detected	not_detected	not_detected	not_detected	not_detected	not_detected		not_detected	not_detected	not_detected	not_detected	not_detected	not_detected	not_detected	detected	not_detected	not_detected	not_detected	1.21656		-0.0564924
461b4d6e6b055f4	2	negative	0	0	0																not_detected	not_detected	not_detected	not_detected	not_detected	not_detected		not_detected	not_detected	not_detected	not_detected	not_detected	not_detected	detected	not_detected	not_detected	not_detected	not_detected
359aeee378e2b1b	11	negative	0	0	0																not_detected	not_detected	not_detected	not_detected	not_detected	not_detected		not_detected	not_detected	not_detected	not_detected	not_detected	not_detected	not_detected	detected	not_detected	not_detected	not_detected
0b8fd4208a04224	9	negative	0	0	0																not_detected	not_detected	not_detected	not_detected	not_detected	not_detected		not_detected	not_detected	not_detected	not_detected	not_detected	not_detected	not_detected	detected	not_detected	not_detected	not_detected
e9254c3152816ec	0	negative	0	0	0																not_detected	not_detected	not_detected	not_detected	not_detected	not_detected		not_detected	not_detected	not_detected	not_detected	not_detected	not_detected	not_detected	detected	not_detected	not_detected	not_detected
0d1f3bcdfd24920	6	negative	0	0	0																not_detected	not_detected	not_detected	not_detected	not_detected	detected		not_detected	not_detected	not_detected	not_detected	not_detected	not_detected	not_detected	not_detected	not_detected	not_detected	not_detected
f4cd301d673cd71	4	negative	0	0	0
0894feea1d164f7	6	negative	0	0	0
1bf8918deb9c23b	7	negative	0	0	0																not_detected	not_detected	not_detected	not_detected	not_detected	detected		not_detected	not_detected	not_detected	not_detected	not_detected	not_detected	not_detected	not_detected	not_detected	not_detected	not_detected							negative	negative
f3340d22f0b3df6	3	negative	0	0	0																not_detected	not_detected	not_detected	not_detected	not_detected	detected		not_detected	not_detected	not_detected	not_detected	not_detected	not_detected	not_detected	not_detected	not_detected	not_detected	not_detected
1050ba3c43742e3	10	negative	0	0	0																not_detected	not_detected	not_detected	not_detected	not_detected	not_detected		not_detected	not_detected	not_detected	not_detected	not_detected	not_detected	not_detected	not_detected	not_detected	not_detected	not_detected
630b1c03ae8e70a	16	negative	0	0	0	-0.701917	-0.460932	0.437284	-0.662483	-0.814774	0.668057	0.841616	-0.489767	0.387152	0.753163	-0.371974	0.386517	0.4626	0.967144		not_detected	not_detected	not_detected	not_detected	not_detected	not_detected		not_detected	not_detected	not_detected	not_detected	not_detected	not_detected	not_detected	not_detected	not_detected	not_detected	not_detected	-0.643671		-0.533375
9b29b83728e26d5	11	negative	0	0	0																not_detected	not_detected	not_detected	not_detected	not_detected	detected		not_detected	not_detected	not_detected	not_detected	not_detected	not_detected	not_detected	not_detected	not_detected	not_detected	not_detected
f735f129326eef8	14	negative	0	0	0																not_detected	not_detected	not_detected	not_detected	not_detected	not_detected		not_detected	not_detected	not_detected	not_detected	not_detected	not_detected	not_detected	not_detected	not_detected	not_detected	not_detected
9498fc3b79c1b18	1	negative	0	0	0																not_detected	not_detected	not_detected	not_detected	not_detected	not_detected		not_detected	not_detected	not_detected	not_detected	not_detected	not_detected	not_detected	not_detected	not_detected	not_detected	not_detected
4dafefc62569623	1	negative	0	0	0																not_detected	not_detected	not_detected	not_detected	not_detected	not_detected		not_detected	not_detected	not_detected	not_detected	not_detected	not_detected	not_detected	not_detected	not_detected	not_detected	not_detected
55631ce7d0aa2d1	9	negative	0	0	0
63c9cd68803485c	3	negative	0	0	0																not_detected	not_detected	not_detected	not_detected	not_detected	not_detected		not_detected	not_detected	not_detected	not_detected	not_detected	not_detected	not_detected	not_detected	not_detected	not_detected	not_detected							negative	negative
b35c3d0764ba5ea	2	negative	0	0	0																not_detected	not_detected	not_detected	not_detected	not_detected	detected		not_detected	not_detected	not_detected	not_detected	not_detected	not_detected	not_detected	not_detected	not_detected	not_detected	not_detected
1e389067224d4bd	13	negative	0	0	0																																								negative	negative
b591e96a24be1a7	11	negative	0	0	0	-0.0381476	0.102972	0.173487	-1.33564	0.36646	-1.38744	0.542882	-0.0166921	-0.834685	-0.501356	-0.793368	-0.855315	-0.640455	0.347948	0.616464																			1.7902	0.230425	0.0309361	0.642567	-1.29443	-0.215628	negative	negative
df05cbd8913e3b1	18	negative	0	0	0																not_detected	not_detected	not_detected	not_detected	detected	not_detected		not_detected	not_detected	not_detected	not_detected	not_detected	not_detected	not_detected	not_detected	not_detected	not_detected	not_detected
b024c0bcbd06c55	12	negative	0	0	0																not_detected	not_detected	not_detected	not_detected	not_detected	not_detected		not_detected	not_detected	not_detected	not_detected	not_detected	not_detected	not_detected	not_detected	not_detected	not_detected	not_detected
a577ccdafc1bb65	18	negative	0	0	0																																								negative	negative
db17e8c41f6f01a	18	negative	0	0	0																																								negative	negative
a713345aef928fa	10	negative	0	0	0																																								positive	negative
91c693484d5abff	10	negative	0	0	0																not_detected	not_detected	not_detected	not_detected	not_detected	not_detected		not_detected	not_detected	not_detected	not_detected	not_detected	not_detected	not_detected	detected	not_detected	not_detected	not_detected							negative	negative
c7493375e3a576c	3	negative	0	0	0	-1.36568	-1.33812	-1.53492	2.03015	-1.90786	-0.79041	-0.253742	-0.960059	-0.529226	1.48497	-0.835508	1.80862	0.672705	-0.978899		not_detected	not_detected	detected	not_detected	not_detected	not_detected		not_detected	not_detected	not_detected	not_detected	not_detected	not_detected	not_detected	not_detected	not_detected	not_detected	not_detected	0.806817	-1.33268	-0.396271	-0.632489	-0.552949	-0.215628	positive	negative
8d5055e0c0c192e	7	negative	0	0	0	-1.06813	-1.2128	-0.756087	0.347255	-0.779514	2.31416	-0.95079	-1.65854	-1.14014	-0.814985	-0.414114	-0.454724	1.09292	0.524862	-0.655484	not_detected	not_detected	detected	not_detected	not_detected	not_detected		not_detected	not_detected	not_detected	not_detected	not_detected	not_detected	not_detected	not_detected	not_detected	not_detected	not_detected		-1.18381	-0.487674	-1.04602	-0.0586259	-0.215628	negative	negative	-0.448998	-0.355744	-0.442915
9955f256c9d5957	2	negative	0	0	0																not_detected	not_detected	not_detected	not_detected	not_detected	not_detected		not_detected	not_detected	not_detected	not_detected	not_detected	not_detected	not_detected	not_detected	not_detected	not_detected	not_detected
26bc5c882b8bebc	18	negative	0	0	0	1.10628	1.16812	-0.781211	0.122869	0.313568	0.173372	0.443306	-0.717956	0.99807	1.38042	0.344395	1.28785	3.2465	-0.271247		not_detected	not_detected	not_detected	not_detected	not_detected	not_detected		not_detected	not_detected	not_detected	not_detected	not_detected	not_detected	not_detected	not_detected	not_detected	not_detected	not_detected	-1.19273	-1.18381	-0.487674	-0.873716	0.682859	0.503132	negative	negative	-0.448998	-0.355744	-0.442915
088069217e95a4a	6	negative	0	0	0																not_detected	not_detected	not_detected	not_detected	not_detected	not_detected		not_detected	not_detected	not_detected	not_detected	not_detected	not_detected	not_detected	not_detected	not_detected	not_detected	not_detected
059865b65632d01	9	negative	0	0	0																not_detected	not_detected	not_detected	not_detected	not_detected	not_detected		not_detected	not_detected	not_detected	not_detected	not_detected	not_detected	not_detected	not_detected	not_detected	not_detected	not_detected
c9739f576bd044a	6	negative	0	0	0																not_detected	not_detected	not_detected	not_detected	not_detected	not_detected		not_detected	not_detected	not_detected	not_detected	not_detected	not_detected	not_detected	not_detected	not_detected	not_detected	not_detected
8373a45627f7242	11	negative	0	0	0																																								negative	negative
b89dc0c04052d7c	0	negative	0	0	0																detected	not_detected	not_detected	not_detected	not_detected	not_detected		not_detected	not_detected	not_detected	not_detected	not_detected	not_detected	not_detected	not_detected	not_detected	not_detected	not_detected							negative	negative
f26de4fe4f5942e	2	negative	0	0	0	-0.381476	-0.0849959	0.701083	-0.55029	0.207786	-1.6092	1.14035	4.45526	-1.14014	-0.553627	-0.835508	-1.17579	-0.745508	-0.536617	0.0410588	not_detected	not_detected	not_detected	not_detected	not_detected	not_detected		not_detected	not_detected	not_detected	not_detected	not_detected	not_detected	not_detected	not_detected	not_detected	not_detected	not_detected		-0.588343	1.02643	-1.11494			negative	negative	-0.421433	-0.278326
2ba16c9567f360d	9	negative	0	0	0	1.17495	0.854844	-1.01989	-1.78442	0.824849	-0.193377	-0.85121	-0.317234	-0.223767	-0.0831831	1.60858	0.366488	0.0423882	-0.44816		not_detected	not_detected	not_detected	not_detected	not_detected	detected		not_detected	not_detected	not_detected	not_detected	not_detected	not_detected	not_detected	not_detected	not_detected	not_detected	not_detected	-0.053642	0.677025	-0.469791	0.40134			negative	negative
8bc0af121c69ce8	11	negative	0	0	0	0.305181	0.228284	-0.580222	-1.11126	0.0491127	-0.133674	-0.253742	-0.253229	0.692611	0.282719	1.73499	0.406546	-0.0889278	-0.0943343																				-0.119201		-0.489661	0.229035	1.6715	1.22189
671655cb4b17c2e	3	negative	0	0	0	-0.79347	-0.899524	-1.18319	2.59112	-0.814774	-1.71155	-0.652057	-0.962841	-1.14014	-0.135455	-0.751229	0.186222	-0.193981	-0.44816	-0.29207	not_detected	not_detected	not_detected	not_detected	not_detected	not_detected		not_detected	not_detected	not_detected	not_detected	not_detected	not_detected	not_detected	detected	not_detected	not_detected	not_detected	1.96229	-0.96051	0.0329231	-0.598028	-2.28308	-2.01253	negative	negative	-0.559257	-0.47187
93d3d13872160f9	14	negative	0	0	0																not_detected	not_detected	not_detected	not_detected	not_detected	not_detected		not_detected	not_detected	not_detected	not_detected	not_detected	not_detected	not_detected	not_detected	not_detected	not_detected	not_detected
17f4716c1c1beb4	6	negative	0	0	0	0.671398	0.416252	-0.0400642	-1.56003	0.913001	-0.79041	-0.751633	-0.172528	-0.834685	-0.919529	-0.371974	-0.63499	2.4586	-0.801985		not_detected	not_detected	not_detected	not_detected	not_detected	not_detected		not_detected	not_detected	not_detected	not_detected	not_detected	not_detected	not_detected	not_detected	not_detected	not_detected	not_detected	0.167619	-0.96051	0.245533	-0.391262			negative	negative
7c92918ab3e44d5	0	negative	0	0	0
ac386bec60d6b77	3	negative	0	0	0																not_detected	not_detected	not_detected	not_detected	not_detected	not_detected		not_detected	not_detected	not_detected	not_detected	not_detected	not_detected	not_detected	not_detected	not_detected	not_detected	not_detected							negative	negative
00ac9eaa6c5358f	2	negative	0	0	0																not_detected	not_detected	not_detected	not_detected	not_detected	not_detected		not_detected	not_detected	not_detected	not_detected	not_detected	not_detected	not_detected	not_detected	not_detected	not_detected	not_detected							negative	negative
88524f09cefa7bd	9	negative	0	0	0																																								negative	negative
fdea9543f796210	11	negative	0	0	0																not_detected	not_detected	not_detected	not_detected	not_detected	detected		not_detected	not_detected	not_detected	not_detected	not_detected	not_detected	not_detected	not_detected	not_detected	not_detected	not_detected							negative	negative
0e41ddc87cbd03e	16	negative	0	0	0																																								negative	negative
af186599de01266	16	negative	0	0	0																																								negative	negative
0d2a876b15cf57e	2	negative	0	0	0																not_detected	not_detected	not_detected	not_detected	not_detected	not_detected		not_detected	not_detected	not_detected	not_detected	not_detected	not_detected	not_detected	not_detected	not_detected	not_detected	not_detected							negative	negative
a038ae69a3f0de9	16	negative	0	0	0	0.579844	0.416252	-0.630469	-0.999063	0.102004	-0.943933	-0.452899	-0.495332	0.387152	0.491805	-0.498393	0.807138	2.40608	-0.271247		not_detected	not_detected	detected	not_detected	not_detected	not_detected		not_detected	not_detected	not_detected	not_detected	not_detected	not_detected	not_detected	not_detected	not_detected	not_detected	not_detected	0.323321	0.602592	-0.0843106	0.263496			negative	negative
c6ef89607c76c1e	11	negative	0	0	0
4cb3f0f82204253	6	negative	0	0	0
3cc2ad7d7a72306	5	negative	0	0	0
a5c21bcffb34f5a	7	negative	0	0	0
fada948f9ec7d91	8	negative	0	0	0
a3f961ef2646aa1	11	negative	0	0	0																not_detected	not_detected	not_detected	not_detected	not_detected	not_detected		not_detected	not_detected	not_detected	not_detected	not_detected	not_detected	not_detected	not_detected	not_detected	not_detected	not_detected							negative	negative
588bbf4f5b6950b	1	negative	0	0	0
3721fd9e52fc041	6	negative	0	0	0	1.38094	1.23078	-0.931953	-0.886869	1.38902	-1.35333	-0.253742	-0.192008	-0.223767	-0.396813	-0.624811	-0.334546	-0.745508	0.0825793		not_detected	not_detected	not_detected	not_detected	not_detected	not_detected		not_detected	not_detected	not_detected	not_detected	not_detected	not_detected	not_detected	not_detected	not_detected	not_detected	not_detected	1.74103	0.379292	-0.400245	0.0911916			negative	negative
88798e554b4600a	4	negative	0	0	0
0f77fabc0fe7a6c	13	negative	0	0	0	1.72427	1.60672	-1.52236	3.71305	1.40665	-0.227493	-0.0545852	-0.631689	0.387152	0.125903	-0.624811	0.186222	-0.299034	0.171035	-0.382924	not_detected	not_detected	not_detected	not_detected	not_detected	not_detected		not_detected	not_detected	not_detected	not_detected	not_detected	not_detected	not_detected	not_detected	not_detected	not_detected	not_detected	0.503607	-0.439476	-0.497609	0.0222695	-0.0586259	-0.215628	negative	negative	-0.0906571	-0.1622	0.174773
80e9a46c8f5889f	11	negative	0	0	0
d5498bad8664f71	13	negative	0	0	0
976c2c2cfddc4e8	7	negative	0	0	0																																								negative	negative
4467831d67537cd	4	negative	0	0	0	0.396736	0.228284	-0.517413	0.122869	-0.232973	1.08598	-0.552476	-0.69291	0.99807	0.805435	-0.287696	1.20773	-0.850561	-0.44816		not_detected	not_detected	not_detected	not_detected	not_detected	detected		not_detected	not_detected	not_detected	not_detected	not_detected	not_detected	not_detected	not_detected	not_detected	not_detected	not_detected	-0.668255	-0.439476	-0.364479	-1.1494			negative	negative
a6032d0257f57e6	16	negative	0	0	0																																								negative	negative
d97aa9c07b7f329	14	negative	0	0	0	1.63272	1.60672	-0.0526261	-0.774677	1.33613	0.0966106	0.244149	-0.545423	0.387152	0.282719	1.3136	0.166192	0.252494	-0.801985		not_detected	not_detected	not_detected	not_detected	not_detected	detected		not_detected	not_detected	not_detected	not_detected	not_detected	not_detected	not_detected	not_detected	not_detected	not_detected	not_detected	-0.356851	-0.216176	-0.336661	0.504723
3f89f1eb50494c8	1	negative	0	0	0																not_detected	not_detected	not_detected	not_detected	not_detected	detected		not_detected	not_detected	detected	not_detected	not_detected	not_detected	not_detected	detected	not_detected	not_detected	not_detected
cef5187d2a5c8db	1	negative	0	0	0
9565c7a0f46fe80	16	negative	0	0	0																not_detected	not_detected	not_detected	not_detected	not_detected	not_detected		not_detected	not_detected	not_detected	not_detected	not_detected	not_detected	not_detected	not_detected	not_detected	not_detected	not_detected
66b380d899e0211	10	negative	0	0	0																not_detected	not_detected	not_detected	not_detected	not_detected	not_detected		not_detected	not_detected	not_detected	not_detected	not_detected	not_detected	not_detected	not_detected	not_detected	not_detected	not_detected
aed9077005bb908	13	negative	0	0	0
f57a624c0b72e1b	12	negative	0	0	0
9647535684dc0c1	5	negative	0	0	0	1.08339	1.4814	-0.555098	-0.662483	1.10693	0.147785	1.63824	-0.564902	-0.529226	0.439533	-0.0769989	-0.314517	1.14544	-0.801985	-0.352639	not_detected	not_detected	not_detected	not_detected	not_detected	not_detected		not_detected	not_detected	not_detected	not_detected	not_detected	not_detected	not_detected	not_detected	not_detected	not_detected	not_detected	-0.38963	-0.96051	-0.0644404	0.263496	2.41299	-1.65315
f76bae51704ec42	5	negative	0	0	0
4500c99839db8fb	15	negative	0	0	0																not_detected	not_detected	not_detected	not_detected	not_detected	not_detected		not_detected	not_detected	not_detected	not_detected	not_detected	not_detected	not_detected	not_detected	not_detected	not_detected	not_detected
6ead361b113c051	17	negative	0	0	0
2dc498cc5f125d9	2	negative	0	0	0
90719f09d0d34bb	13	negative	0	0	0																not_detected	not_detected	not_detected	not_detected	not_detected	detected		not_detected	not_detected	not_detected	not_detected	not_detected	not_detected	not_detected	not_detected	not_detected	not_detected	not_detected
d9399fc1ba41688	11	negative	0	0	0
6a0ee0655f2e336	7	negative	0	0	0
908abb34985790b	15	negative	0	0	0
cb8ea770e71f98b	2	negative	0	0	0																not_detected	not_detected	not_detected	not_detected	not_detected	detected		not_detected	not_detected	not_detected	not_detected	not_detected	not_detected	not_detected	not_detected	not_detected	not_detected	not_detected
be0345ab0caf520	11	negative	0	0	0
fbe5eb8b3a4326c	4	negative	0	0	0
4d2fd72b4ca5b63	16	negative	0	0	0																not_detected	not_detected	not_detected	not_detected	not_detected	not_detected		not_detected	not_detected	not_detected	not_detected	not_detected	not_detected	not_detected	not_detected	not_detected	not_detected	not_detected
2f007d20c6ba5ba	4	negative	0	0	0
1ff3957f363c7cc	7	negative	0	0	0
977fcd3057046f3	1	negative	0	0	0																not_detected	not_detected	not_detected	not_detected	not_detected	detected		not_detected	not_detected	not_detected	not_detected	not_detected	not_detected	not_detected	not_detected	not_detected	not_detected	not_detected
bdbf929e59dc7b8	0	negative	0	0	0																not_detected	not_detected	not_detected	not_detected	not_detected	not_detected		not_detected	not_detected	not_detected	not_detected	not_detected	not_detected	not_detected	not_detected	not_detected	not_detected	not_detected
41b941d6a5672d5	7	negative	0	0	0																not_detected	not_detected	not_detected	not_detected	not_detected	not_detected		not_detected	not_detected	not_detected	not_detected	not_detected	not_detected	not_detected	not_detected	not_detected	not_detected	not_detected
16a75083aa82752	6	negative	0	0	0
de2f4672bc1ea0c	14	negative	0	0	0
290af03525da251	9	negative	0	0	0
5d389ada72c228b	0	negative	0	0	0																																								negative	negative
fb5fa6fadb18821	11	negative	0	0	0
e4ac2610325454a	14	negative	0	0	0
56f45b39bad0b18	9	negative	0	0	0	1.08339	1.16812	-0.492289	-0.774677	0.983522	-0.730707	0.542882	-0.453591	0.387152	0.178175	0.765789	-0.0941924	-0.745508	-0.0943343																				0.855986	0.900325	-0.461843	-0.253418	1.42434		negative	negative
1d558a734ee09be	16	negative	0	0	0
7dd075327e5199b	13	negative	0	0	0
92cffd80589acce	17	negative	0	0	0	0.465401	0.729532	-1.4093	-0.325903	0.278308	-0.833055	1.14035	-0.111307	-0.223767	0.700891	-0.119138	0.22628	1.32929	0.524862	-0.0497947																			0.495413	0.677025	-0.0247002	1.12502	-0.80011	0.143752	negative	negative
b223ad32b641f09	18	negative	0	0	0	1.24361	1.10547	-0.42948	1.2448	1.23035	0.514534	-0.154166	0.222628	-0.223767	-0.344541	0.00727989	-0.274459	-0.614192	-0.536617	-0.564631																			-0.217539	0.825892	-0.384349	0.297958	-0.0586259	-0.215628	negative	negative
ca6360be4bf9db1	9	negative	0	0	0
8deec98935594f1	1	negative	0	0	0																																								negative	positive
81af3cf78838c6e	11	negative	0	0	0
1708f7451356ccc	17	negative	0	0	0
fdfb9d5fa777dc0	1	negative	0	0	0																																								negative	positive
f778b3ab0412864	9	negative	0	0	0
8187829eb904a2c	8	negative	0	0	0
6967ca625f17937	7	negative	0	0	0
696e737573e342a	13	negative	0	0	0																not_detected	not_detected	not_detected	not_detected	not_detected	not_detected		not_detected	not_detected	not_detected	not_detected	not_detected	not_detected	detected	not_detected	not_detected	not_detected	not_detected
dc34390abb0175a	13	negative	0	0	0
d1184ac5d80d57a	8	negative	0	0	0																																								negative	negative
979ca65d6617253	11	negative	0	0	0																																								negative	negative
23e69b7fe703a9d	14	negative	0	0	0																																								negative	negative
988d4ee3e6a5ec2	11	negative	0	0	0																not_detected	not_detected	not_detected	not_detected	not_detected	not_detected		not_detected	not_detected	not_detected	not_detected	not_detected	not_detected	not_detected	not_detected	not_detected	not_detected	not_detected
37103be2da69375	7	negative	0	0	0
21153ad34cd62ab	16	negative	0	0	0																not_detected	not_detected	not_detected	not_detected	not_detected	not_detected		not_detected	not_detected	not_detected	not_detected	not_detected	not_detected	not_detected	not_detected	not_detected	not_detected	not_detected
d7834ed75f2da44	16	positive	1	0	0																not_detected	not_detected	not_detected	not_detected	not_detected	not_detected		not_detected	not_detected	not_detected	not_detected	not_detected	not_detected	not_detected	not_detected	not_detected	not_detected	not_detected
afdd2d220c70a5c	4	negative	0	0	0																not_detected	not_detected	not_detected	not_detected	not_detected	not_detected		not_detected	not_detected	not_detected	not_detected	not_detected	not_detected	not_detected	not_detected	not_detected	not_detected	not_detected
7d38de612014b47	11	negative	0	0	0																																								negative	negative
9b382eda81a576a	11	negative	0	0	0
3,33182E+14	13	negative	0	0	0
5e23841b7ae8086	11	negative	0	0	0																not_detected	not_detected	not_detected	not_detected	not_detected	not_detected		not_detected	not_detected	not_detected	not_detected	not_detected	not_detected	not_detected	not_detected	not_detected	not_detected	not_detected
436b8599f799842	1	negative	0	0	0
54e6578edb8ec65	16	negative	0	0	0	0.831618	0.541564	-0.70584	-0.999063	1.10693	-0.645416	-0.85121	-0.275492	-0.223767	-1.02407	-0.70909	-0.715108	0.4626	0.524862		not_detected	not_detected	not_detected	not_detected	not_detected	not_detected		not_detected	not_detected	not_detected	not_detected	not_detected	not_detected	not_detected	detected	not_detected	not_detected	not_detected	0.700284	0.304858	0.609157	1.29733
b2f5e941c8f4737	12	negative	0	0	0																not_detected	not_detected	not_detected	not_detected	not_detected	detected		not_detected	not_detected	not_detected	not_detected	not_detected	not_detected	not_detected	not_detected	not_detected	not_detected	not_detected
6f1ce4d83288ee5	16	negative	0	0	0
d3adcbd9067a5f4	3	negative	0	0	0	-1.82346	-1.90202	0.248857	1.13261	-1.60814	0.506005	-0.95079	-0.0139094	-0.223767	-0.501356	-0.371974	-0.0941924	-0.27277	-0.0943343	-0.746338	not_detected	not_detected	not_detected	not_detected	not_detected	detected		not_detected	not_detected	not_detected	not_detected	not_detected	not_detected	not_detected	not_detected	not_detected	not_detected	not_detected	-0.274903	-0.439476	-0.207505	-0.66695	-0.552949	1.22189			-0.531692	-0.510579	-0.229532
c5ff514570bfc36	7	negative	0	0	0	0.122073	0.228284	-0.442042	0.235063	0.0843743	0.224546	0.443306	-0.595513	2.52537	0.178175	-0.203417	0.00595534	-1.0344	-0.978899		not_detected	not_detected	not_detected	not_detected	not_detected	not_detected		not_detected	not_detected	not_detected	not_detected	not_detected	not_detected	not_detected	not_detected	not_detected	not_detected	not_detected	0.159424		-0.533375
c8c628a7f1d8274	1	negative	0	0	0																not_detected	not_detected	not_detected	not_detected	not_detected	detected		not_detected	not_detected	not_detected	not_detected	detected	not_detected	not_detected	not_detected	not_detected	not_detected	not_detected
3a0fbb5bc68b82c	1	negative	0	0	0																not_detected	not_detected	not_detected	not_detected	not_detected	not_detected		not_detected	not_detected	not_detected	not_detected	not_detected	not_detected	not_detected	detected	not_detected	not_detected	not_detected							negative	negative
57e666bcd3598ae	7	negative	0	0	0																not_detected	not_detected	not_detected	not_detected	not_detected	not_detected		not_detected	not_detected	not_detected	not_detected	not_detected	not_detected	not_detected	not_detected	not_detected	not_detected	not_detected
f9ad87d84f14dcb	16	negative	0	0	0
cff8713eb8ec251	14	negative	0	0	0
10b9c72c7f543ec	3	negative	0	0	0
2234f2191a196aa	2	negative	0	0	0
b97820edf06d4d9	15	negative	0	0	0	-0.564585	-0.460932	-1.32137	0.908221	-0.215342	-0.295726	0.343725	-0.871009	0.692611	-0.449085	0.386534	-0.67505	2.9576	-0.18279		not_detected	not_detected	not_detected	not_detected	not_detected	not_detected		not_detected	not_detected	not_detected	not_detected	not_detected	not_detected	not_detected	detected	not_detected	not_detected	not_detected	-0.651866		1.9186
ec4a3b6a01faa5f	2	negative	0	0	0
163ea20b07bc0be	2	negative	0	0	0
a678f7e51b8c7bf	3	negative	0	0	0
04235e8a80d92ed	12	negative	0	0	0	-0.106813	-0.6489	0.19861	1.02042	0.472242	-0.304255	-2.14573	-0.139135	0.0816925	-1.96496	-0.66695	-1.17579	0.0161249	0.701775		not_detected	not_detected	not_detected	not_detected	detected	not_detected		not_detected	not_detected	not_detected	not_detected	not_detected	not_detected	not_detected	not_detected	not_detected	not_detected	not_detected	0.495413		-0.517479
640cafeb5813b2f	17	negative	0	0	0
23f489c45df652c	18	negative	0	0	0
b1477bfe4c4c9ca	6	negative	0	0	0
237908feb048960	5	negative	0	0	0
e71bc94bda4d3dc	1	negative	0	0	0																not_detected	not_detected	not_detected	not_detected	not_detected	detected		not_detected	not_detected	not_detected	not_detected	not_detected	not_detected	not_detected	not_detected	not_detected	not_detected	not_detected							negative	negative
f77834b25aaf19f	9	negative	0	0	0
91b2a0c80df5afa	13	negative	0	0	0																not_detected	not_detected	not_detected	not_detected	not_detected	not_detected		not_detected	not_detected	not_detected	not_detected	not_detected	not_detected	not_detected	not_detected	not_detected	not_detected	not_detected
f005b35561a3771	0	negative	0	0	0
c45f1224d276b2f	18	negative	0	0	0
8795fc9e552e69d	1	negative	0	0	0
94b43d2b53928dd	1	negative	0	0	0
60e121cc0a97d81	4	negative	0	0	0	0.694287	0.416252	0.0604302	0.796029	0.225417	1.40155	-0.85121	-0.656734	0.99807	0.282719	0.892207	0.74705	0.147441	-0.0943343																				-1.52871
a8f99e21f4e2f94	0	negative	0	0	0
417846d38ffe73a	13	negative	0	0	0
c89c681164d06ab	3	negative	0	0	0
bcc3de2ec42c4bd	3	negative	0	0	0
c89814743bad2b3	9	negative	0	0	0																not_detected	not_detected	not_detected	not_detected	not_detected	not_detected		detected	not_detected	not_detected	not_detected	not_detected	not_detected	not_detected	not_detected	not_detected	not_detected	not_detected
5b7be7fd6325003	14	negative	0	0	0
ff769b24acba778	17	negative	0	0	0																not_detected	not_detected	not_detected	not_detected	not_detected	detected		not_detected	not_detected	not_detected	not_detected	not_detected	not_detected	not_detected	not_detected	not_detected	not_detected	not_detected
1e76e8f857f66e6	13	negative	0	0	0																not_detected	not_detected	not_detected	not_detected	not_detected	detected		not_detected	not_detected	not_detected	not_detected	not_detected	not_detected	not_detected	not_detected	not_detected	not_detected	not_detected
bfbc87435ca860a	4	negative	0	0	0																not_detected	not_detected	detected	not_detected	not_detected	not_detected		not_detected	not_detected	not_detected	not_detected	not_detected	not_detected	not_detected	not_detected	not_detected	not_detected	not_detected
72c937c8c347572	10	negative	0	0	0																not_detected	not_detected	not_detected	not_detected	not_detected	not_detected		not_detected	not_detected	not_detected	not_detected	not_detected	not_detected	not_detected	not_detected	not_detected	not_detected	not_detected
512190ee63c1252	7	negative	0	0	0	1.24361	0.980156	0.19861	0.683835	0.842479	1.23097	-0.652057	-1.0658	1.91445	0.125903	2.4935	0.446606	-0.798034	0.171035	-0.867475																			-1.3894	0.602592	-0.535362	0.263496	2.16583	0.862512			-0.448998	-0.394452	-0.420454
7f33ca2edbef4f9	0	negative	0	0	0																not_detected	not_detected	not_detected	not_detected	not_detected	not_detected		not_detected	not_detected	not_detected	not_detected	not_detected	not_detected	not_detected	not_detected	not_detected	not_detected	not_detected
9e61076a9d83041	14	negative	0	0	0																not_detected	not_detected	not_detected	not_detected	not_detected	detected		not_detected	not_detected	not_detected	not_detected	not_detected	not_detected	not_detected	not_detected	not_detected	not_detected	not_detected
0cb811d1d2c0c32	10	negative	0	0	0	0.80873	0.729532	0.512655	-0.101517	0.913001	0.207488	-0.0545852	-0.500898	0.387152	-0.396813	-0.287696	-0.414665	-0.509139	-0.359703																				0.061086	0.900325		0.297958	2.16583	0.143752	negative	negative
9a8d9636b7650b0	7	negative	0	0	0	1.2665	1.16812	-0.190806	0.908221	0.824849	0.497476	-0.0545852	-0.325582	1.60899	0.439533	0.0915587	0.526723	-0.43035	-0.978899	-0.746338																			-0.373241	0.751459		0.366879	1.17718	-0.575008			0.102296	-0.239617	-0.251993
535dbdaedbd464c	15	negative	0	0	0
a9b7910cce89a07	5	negative	0	0	0
c72aa3ef76576b7	12	negative	0	0	0
35725133baf0ad9	7	negative	0	0	0
dbcf835d3ef53c8	5	negative	0	0	0
0ed2828bc38a3c4	3	negative	0	0	0
911ac7eca576194	11	negative	0	0	0
35176fed9a47493	15	negative	0	0	0
6e188d85328313d	16	negative	0	0	0
93d59e19ef57bc9	0	negative	0	0	0																not_detected	not_detected	not_detected	not_detected	not_detected	detected		not_detected	not_detected	not_detected	not_detected	not_detected	not_detected	not_detected	not_detected	not_detected	not_detected	not_detected
547b5a4941d9d29	18	negative	0	0	0
d73b05dc3f7793e	18	negative	0	0	0
b9b0adbf98a63c6	2	negative	0	0	0																not_detected	not_detected	not_detected	not_detected	not_detected	not_detected		not_detected	not_detected	not_detected	not_detected	not_detected	detected	not_detected	not_detected	not_detected	not_detected	not_detected
fff6cd69cbbfe83	1	negative	0	0	0																not_detected	not_detected	not_detected	not_detected	not_detected	not_detected		not_detected	not_detected	not_detected	not_detected	not_detected	detected	not_detected	not_detected	not_detected	not_detected	not_detected
7c5eab466123e5a	15	negative	0	0	0
37d50db73c0eaeb	17	negative	0	0	0																not_detected	not_detected	not_detected	not_detected	not_detected	not_detected		not_detected	not_detected	not_detected	not_detected	not_detected	not_detected	not_detected	not_detected	not_detected	not_detected	not_detected
947b8cf6dcba229	1	negative	0	0	0
41cbee7d9565344	15	negative	0	0	0																not_detected	not_detected	not_detected	not_detected	not_detected	not_detected		not_detected	not_detected	not_detected	not_detected	not_detected	not_detected	not_detected	not_detected	not_detected	not_detected	not_detected
dae6c26719bfbf7	1	negative	0	0	0
b02d278a976ae6c	16	negative	0	0	0																not_detected	not_detected	not_detected	not_detected	not_detected	detected		not_detected	not_detected	not_detected	not_detected	not_detected	not_detected	not_detected	not_detected	not_detected	not_detected	not_detected
4365afc0157d2a2	2	negative	0	0	0																not_detected	not_detected	not_detected	not_detected	not_detected	not_detected		not_detected	not_detected	not_detected	not_detected	not_detected	not_detected	not_detected	not_detected	not_detected	not_detected	not_detected
90dd8c58dfc7632	9	negative	0	0	0																not_detected	not_detected	not_detected	not_detected	not_detected	not_detected		not_detected	not_detected	not_detected	not_detected	not_detected	not_detected	not_detected	not_detected	not_detected	not_detected	not_detected
8cd2592cb0c9837	3	negative	0	0	0																not_detected	not_detected	not_detected	not_detected	not_detected	not_detected		not_detected	not_detected	not_detected	not_detected	not_detected	not_detected	not_detected	not_detected	not_detected	not_detected	not_detected
f1f877e97bfdf21	16	negative	0	0	0																not_detected	not_detected	not_detected	not_detected	not_detected	not_detected		not_detected	not_detected	not_detected	not_detected	not_detected	not_detected	not_detected	not_detected	not_detected	not_detected	not_detected
26586f0005191ee	13	negative	0	0	0
5c73fc6ba3add38	14	negative	0	0	0
8cdb46b613bf50f	8	negative	0	0	0																not_detected	not_detected	not_detected	not_detected	not_detected	detected		not_detected	not_detected	not_detected	not_detected	not_detected	not_detected	not_detected	not_detected	not_detected	not_detected	not_detected
344fed4c5beda25	2	negative	0	0	0
53ad9106b7a0881	14	negative	0	0	0																not_detected	not_detected	not_detected	not_detected	not_detected	not_detected		not_detected	not_detected	not_detected	not_detected	not_detected	not_detected	not_detected	not_detected	not_detected	not_detected	not_detected
81842ee0bcd38be	3	negative	0	0	0
d25be79420274f1	7	negative	0	0	0																not_detected	not_detected	not_detected	not_detected	not_detected	not_detected		not_detected	not_detected	not_detected	not_detected	not_detected	not_detected	not_detected	not_detected	not_detected	not_detected	not_detected
0b55714daf54ab8	11	negative	0	0	0																not_detected	not_detected	not_detected	not_detected	not_detected	not_detected		not_detected	not_detected	not_detected	not_detected	not_detected	not_detected	not_detected	detected	not_detected	not_detected	not_detected
3196c9890d69a22	0	negative	0	0	0
239564e00e8076b	6	negative	0	0	0
f8f99dbe39448fc	9	negative	0	0	0
ceaa5fc6af20df9	15	negative	0	0	0	0.0762952	0.228284	-0.668155	-0.55029	-0.00377785	-0.312784	0.642463	-0.915534	0.692611	0.387261	-0.498393	0.0860739	2.85255	-0.359703		not_detected	not_detected	not_detected	not_detected	not_detected	not_detected		not_detected	not_detected	not_detected	not_detected	not_detected	not_detected	not_detected	detected	not_detected	not_detected	not_detected	-0.430605	-0.290609		0.366879	0.188535	-0.575008	negative	negative	-0.118222	-0.123491	-0.285685
c52fcadd82ea4f0	0	negative	0	0	0
d9d473cdc48ba24	1	negative	0	0	0
ae350190bb7ac57	0	negative	0	0	0																																								positive	negative
db99027ab6f9e3a	15	negative	0	0	0																not_detected	not_detected	not_detected	not_detected	not_detected	detected		not_detected	not_detected	not_detected	not_detected	not_detected	not_detected	not_detected	not_detected	not_detected	not_detected	not_detected
ac5c15062a67fc5	2	negative	0	0	0																not_detected	not_detected	not_detected	not_detected	not_detected	not_detected		not_detected	not_detected	not_detected	not_detected	not_detected	not_detected	not_detected	not_detected	not_detected	not_detected	not_detected							negative	negative
273a659e2724251	16	negative	0	0	0																not_detected	not_detected	not_detected	not_detected	not_detected	detected		not_detected	not_detected	not_detected	not_detected	not_detected	not_detected	not_detected	not_detected	not_detected	not_detected	not_detected
7f99131a75117c2	5	negative	0	0	0
6c9e4f178264c8d	12	negative	0	0	0																not_detected	not_detected	detected	not_detected	not_detected	not_detected		not_detected	not_detected	not_detected	not_detected	not_detected	not_detected	not_detected	not_detected	not_detected	not_detected	not_detected
f5509bb3d404aa8	10	negative	0	0	0
1c79872d2cc195e	6	negative	0	0	0
c8920f4cb2f82b0	11	negative	0	0	0	0.0076297	-0.210308	0.123239	-1.22345	-0.09193	-0.926875	-0.85121	0.826494	-1.14014	-0.239998	0.00727989	0.146163	-0.482876	0.524862		not_detected	not_detected	not_detected	not_detected	not_detected	not_detected		not_detected	not_detected	not_detected	not_detected	not_detected	not_detected	not_detected	detected	not_detected	not_detected	not_detected		-0.588343	2.16101	0.987177	-0.80011	-0.215628			0.0196015	-0.394452
b5fd161f49a283b	5	negative	0	0	0																																								negative	negative
fa798256c58ef6d	19	negative	0	0	0																																								negative	positive
236a35e8a3e3c95	9	negative	0	0	0																not_detected	not_detected	not_detected	not_detected	not_detected	detected		not_detected	not_detected	not_detected	not_detected	not_detected	not_detected	not_detected	not_detected	not_detected	not_detected	not_detected
e8f82adec53ab11	8	negative	0	0	0	0.877395	1.16812	0.0353066	0.683835	1.15983	-0.781881	1.23993	-0.0751308	-0.223767	-0.135455	-0.498393	-0.735138	-1.71725	-0.978899	3.06951	not_detected	not_detected	not_detected	not_detected	not_detected	not_detected		not_detected	not_detected	not_detected	not_detected	not_detected	not_detected	not_detected	not_detected	not_detected	not_detected	not_detected	1.4706		-0.511518	-0.0811133	-1.04727	-0.575008	negative	negative
748bdcd3d18935e	0	negative	0	0	0
69ed0e86d825fa1	6	negative	0	0	0
12c12170d8f5998	13	negative	0	0	0
28669f7ddf96ad0	2	negative	0	0	0																not_detected	not_detected	not_detected	not_detected	not_detected	not_detected		not_detected	not_detected	not_detected	not_detected	not_detected	not_detected	not_detected	not_detected	not_detected	not_detected	not_detected
2f5eacae88cac6f	2	negative	0	0	0																not_detected	not_detected	not_detected	not_detected	not_detected	detected		not_detected	not_detected	not_detected	not_detected	not_detected	not_detected	not_detected	not_detected	not_detected	not_detected	not_detected
02a6e340419afaa	7	negative	0	0	0	0.579844	0.29094	-0.0777497	-1.22345	-0.0214086	0.147785	-0.95079	-0.230967	-0.223767	0.491805	-0.66695	1.06752	-0.193981	-0.890442		not_detected	not_detected	not_detected	not_detected	not_detected	detected		not_detected	not_detected	not_detected	not_detected	not_detected	not_detected	not_detected	not_detected	not_detected	not_detected	not_detected	0.134839		-0.473765
b1e0c6b194afd84	14	negative	0	0	0																not_detected	not_detected	not_detected	not_detected	not_detected	not_detected		not_detected	not_detected	not_detected	not_detected	not_detected	not_detected	not_detected	not_detected	not_detected	not_detected	not_detected
57e52cd17ffedc8	1	negative	0	0	0																not_detected	not_detected	not_detected	not_detected	not_detected	not_detected		not_detected	not_detected	not_detected	not_detected	not_detected	not_detected	not_detected	not_detected	not_detected	not_detected	not_detected
eddf6ee4c1a300d	8	negative	0	0	0																not_detected	not_detected	not_detected	not_detected	not_detected	not_detected		not_detected	not_detected	not_detected	not_detected	not_detected	not_detected	not_detected	not_detected	not_detected	not_detected	not_detected
9fa1a3fd418a814	7	negative	0	0	0																not_detected	not_detected	detected	not_detected	not_detected	not_detected		not_detected	not_detected	not_detected	not_detected	not_detected	not_detected	not_detected	not_detected	not_detected	not_detected	not_detected
6f12ba4d9691b07	2	negative	0	0	0
a99c26022a373dc	1	negative	0	0	0
29ca08b8895e948	12	negative	0	0	0																not_detected	not_detected	not_detected	not_detected	not_detected	not_detected		not_detected	not_detected	not_detected	not_detected	not_detected	not_detected	not_detected	not_detected	not_detected	not_detected	not_detected
0b1eca05ec635a2	13	negative	0	0	0																not_detected	not_detected	not_detected	not_detected	not_detected	not_detected		not_detected	not_detected	not_detected	not_detected	not_detected	not_detected	not_detected	not_detected	not_detected	not_detected	not_detected
88100bb9e30981b	17	negative	0	0	0																not_detected	not_detected	not_detected	not_detected	not_detected	not_detected		not_detected	not_detected	not_detected	not_detected	not_detected	not_detected	not_detected	not_detected	not_detected	not_detected	not_detected
0ee92dbe018b4c5	0	negative	0	0	0																not_detected	not_detected	not_detected	not_detected	not_detected	detected		not_detected	not_detected	not_detected	not_detected	not_detected	not_detected	not_detected	not_detected	not_detected	not_detected	not_detected
7f24e6097d12aa6	2	negative	0	0	0
c3e0b5eeb1c31d9	16	negative	0	0	0	0.0305179	0.102972	-0.70584	-0.213711	-0.0566693	-1.38744	0.343725	1.04633	-0.834685	0.230447	-0.835508	0.126132	0.278757	-0.0058775		not_detected	not_detected	not_detected	not_detected	not_detected	not_detected		not_detected	not_detected	not_detected	not_detected	not_detected	not_detected	not_detected	not_detected	not_detected	not_detected	not_detected	1.51157	1.12363	0.770104	0.642567	-0.0586259	-2.01253
2a83579aae3fd57	13	negative	0	0	0
4dcd59cbe7a1807	13	negative	0	0	0
53c7fe399f64ca0	13	negative	0	0	0																																								negative	negative
f7b9d9f0a6a7736	0	negative	0	0	0																																								negative	negative
5e4888668b691b4	6	negative	0	0	0
def383f6a1cd4eb	16	negative	0	0	0																not_detected	not_detected	not_detected	not_detected	not_detected	not_detected		not_detected	not_detected	not_detected	not_detected	not_detected	not_detected	not_detected	not_detected	not_detected	not_detected	not_detected
864058076b17475	17	negative	0	0	0
ed10156f00160ef	18	negative	0	0	0																																								negative	negative
8733b5587ba412f	19	negative	0	0	1	1.10628	0.854844	-0.894267	1.02042	0.38409	-1.26804	-0.652057	3.15291	-1.14014	0.700891	-0.414114	1.14764	-1.00814	1.94016	-0.170933	not_detected	not_detected	not_detected	not_detected	not_detected	detected		not_detected	not_detected	not_detected	not_detected	not_detected	not_detected	not_detected	not_detected	not_detected	not_detected	not_detected		2.91003	5.94627	5.05357	1.17718	0.503132	negative	negative
ea0d586a1288239	0	negative	0	0	0																not_detected	not_detected	not_detected	not_detected	not_detected	not_detected		not_detected	not_detected	not_detected	not_detected	not_detected	not_detected	not_detected	detected	not_detected	not_detected	not_detected
5,85546E+42	9	negative	0	0	0
31e75a65f668660	9	negative	0	0	0																not_detected	not_detected	detected	not_detected	not_detected	not_detected		not_detected	not_detected	not_detected	not_detected	not_detected	not_detected	not_detected	not_detected	not_detected	not_detected	not_detected
e23dd27579238df	5	negative	0	0	0																not_detected	not_detected	not_detected	not_detected	detected	detected		not_detected	not_detected	not_detected	not_detected	not_detected	not_detected	not_detected	not_detected	not_detected	not_detected	not_detected
b63eec0538a8562	3	negative	0	0	0	-0.129702	0.040316	0.361914	-0.101517	0.243047	-0.943933	0.642463	0.531518	-0.529226	-0.396813	-0.371974	-0.775198	-0.587929	-0.18279		not_detected	not_detected	not_detected	not_detected	not_detected	detected		not_detected	not_detected	not_detected	not_detected	not_detected	not_detected	not_detected	not_detected	not_detected	not_detected	not_detected	1.25753	-0.365042	-0.439986	-1.08048			negative	negative	-0.504127	-0.549287
5eebb49477c088c	17	negative	0	0	0	0.259404	0.416252	-0.730964	0.347255	0.278308	0.352482	0.642463	-0.439676	0.387152	0.178175	1.3136	-0.15428	0.331284	0.613318	1.67642																			-0.627281		-0.521453	1.02164	-0.80011		negative	negative
0b8806f56ca0320	19	negative	0	0	0																not_detected	not_detected	not_detected	not_detected	not_detected	not_detected		not_detected	not_detected	not_detected	not_detected	not_detected	not_detected	not_detected	not_detected	not_detected	not_detected	not_detected
c5a1f31329c2b29	14	negative	0	0	0
b47f8cdefc1a963	13	negative	0	0	0
e84bf721b98f21f	10	negative	0	0	0
1dc882f7f9b7a3c	14	negative	0	0	0																not_detected	detected	not_detected	not_detected	not_detected	not_detected		not_detected	not_detected	not_detected	not_detected	not_detected	not_detected	not_detected	not_detected	not_detected	not_detected	not_detected
2e20f91ee8b71d6	0	negative	0	0	0
d457e998592d6bc	7	negative	0	0	0
3d0edb3d07f3b41	1	negative	0	0	0
ed1e17fc48a084d	1	negative	0	0	0
551b9c84d5d3ac1	11	negative	0	0	0
0c56e7d23e05a48	1	negative	0	0	0
3a4c7aa4bed2c6a	0	negative	0	0	1																not_detected	not_detected	not_detected	not_detected	not_detected	not_detected		not_detected	not_detected	not_detected	detected	not_detected	not_detected	not_detected	not_detected	not_detected	not_detected	not_detected							negative	negative
d8c11fca97a26cd	9	negative	0	0	0
92acad234a6e5d6	18	negative	0	0	0
fab45d9bed47ebd	11	negative	0	0	0
fdc823885832cda	0	negative	0	0	0																detected	not_detected	not_detected	not_detected	not_detected	not_detected		not_detected	not_detected	not_detected	not_detected	not_detected	not_detected	not_detected	not_detected	not_detected	not_detected	not_detected							negative	negative
9941c88adbe911c	16	negative	0	0	0
ed57c3a32dd0680	13	negative	0	0	0
6ac1b87376f4fc9	4	negative	0	0	0
3b5582d48950cb2	13	negative	0	0	0																not_detected	not_detected	not_detected	not_detected	not_detected	not_detected		not_detected	not_detected	not_detected	not_detected	not_detected	not_detected	not_detected	not_detected	not_detected	not_detected	not_detected
0ac0fc06ca65931	16	negative	0	0	0
60bb6a660eb9eea	3	negative	0	0	0
30b9d032b7ea685	3	negative	0	0	0
406adec1a5b07f9	14	negative	0	0	0
1ee5571b5f2b72a	7	negative	0	0	0	-1.06813	-1.27546	0.638273	-1.44784	-0.726622	-0.210435	-1.14995	-0.261578	-0.223767	-1.02407	6.91814	-0.574902	-0.509139	0.259492		not_detected	not_detected	not_detected	not_detected	not_detected	detected		not_detected	not_detected	not_detected	not_detected	not_detected	not_detected	not_detected	not_detected	not_detected	not_detected	not_detected	-0.897711	0.304858	-0.434025	-0.977099			negative	negative
73f27a65a3779b1	10	negative	0	0	0
fe18c49a84b29be	12	negative	0	0	0																not_detected	not_detected	not_detected	not_detected	not_detected	not_detected		not_detected	not_detected	not_detected	not_detected	not_detected	not_detected	not_detected	not_detected	not_detected	not_detected	not_detected
2e5e0844030641a	8	negative	0	0	0
0a8fcbb6fc7f32d	13	negative	0	0	0
31208ad8d606478	16	negative	0	0	0																not_detected	not_detected	not_detected	not_detected	not_detected	not_detected		not_detected	not_detected	not_detected	not_detected	not_detected	not_detected	not_detected	not_detected	not_detected	not_detected	not_detected
4799244d7f74ba1	5	negative	0	0	0
59661b9a951c72f	7	negative	0	0	0
375b601be8a0999	11	negative	0	0	0																not_detected	not_detected	not_detected	not_detected	not_detected	not_detected		not_detected	not_detected	not_detected	not_detected	not_detected	not_detected	not_detected	not_detected	not_detected	not_detected	not_detected
372f03e847fca99	18	negative	0	0	0
9f5c8e208cba01b	3	negative	0	0	0																not_detected	not_detected	not_detected	not_detected	not_detected	detected		not_detected	not_detected	not_detected	not_detected	not_detected	not_detected	not_detected	not_detected	not_detected	not_detected	not_detected
114456f8064b2c4	12	negative	0	0	0	-0.244145	-0.272964	0.286543	-1.56003	0.0314828	-0.730707	-0.154166	-0.0751308	0.0816925	-0.605899	-0.793368	-0.574902	1.27676	-0.536617	-0.0497947	not_detected	not_detected	not_detected	not_detected	not_detected	not_detected		not_detected	not_detected	not_detected	not_detected	not_detected	not_detected	not_detected	detected	not_detected	not_detected	not_detected	0.536387		-0.163791	0.194574	-1.04727	-0.575008	negative	positive	0.240119	-0.1622	-0.0273794
e40cf0794848929	17	negative	0	0	0
df92f8b6da2ddfb	3	negative	0	0	0																not_detected	not_detected	not_detected	not_detected	not_detected	not_detected		not_detected	not_detected	not_detected	not_detected	not_detected	not_detected	detected	not_detected	not_detected	not_detected	not_detected							negative	negative
5d9eb5ba762a1d5	0	negative	0	0	0																not_detected	not_detected	not_detected	not_detected	detected	detected		not_detected	not_detected	not_detected	detected	not_detected	not_detected	not_detected	not_detected	not_detected	not_detected	not_detected
28fb7e2bb4678b8	1	negative	0	0	0																																								negative	negative
bb1c5836f2f00a6	0	negative	0	0	0																not_detected	not_detected	not_detected	not_detected	not_detected	not_detected		not_detected	not_detected	not_detected	detected	not_detected	not_detected	not_detected	not_detected	not_detected	not_detected	not_detected
fe240bc97972043	16	negative	0	0	0
0408cb53fbd4df8	14	negative	0	0	0																not_detected	not_detected	not_detected	not_detected	not_detected	not_detected		not_detected	not_detected	not_detected	not_detected	not_detected	not_detected	not_detected	not_detected	not_detected	not_detected	not_detected
f291e5a9e75238e	18	negative	0	0	0																not_detected	not_detected	not_detected	not_detected	not_detected	not_detected		not_detected	not_detected	not_detected	not_detected	not_detected	not_detected	not_detected	detected	not_detected	not_detected	not_detected
a81d1c806865589	18	negative	0	0	0																not_detected	not_detected	not_detected	not_detected	not_detected	not_detected		not_detected	not_detected	not_detected	not_detected	not_detected	not_detected	not_detected	not_detected	not_detected	not_detected	not_detected
fd40e73d187119e	3	negative	0	0	0																not_detected	not_detected	not_detected	not_detected	not_detected	not_detected		not_detected	not_detected	not_detected	not_detected	not_detected	not_detected	not_detected	not_detected	not_detected	not_detected	not_detected
0879012c5f10c0e	10	negative	0	0	0	0.442512	0.29094	-0.555098	-1.11126	-0.409276	-0.261609	-0.452899	-0.695693	-0.529226	1.27588	-0.371974	1.70847	2.35355	0.259492		not_detected	not_detected	detected	not_detected	not_detected	not_detected		not_detected	not_detected	not_detected	not_detected	not_detected	not_detected	not_detected	not_detected	not_detected	not_detected	not_detected	-0.315877	0.453725	-0.402232	0.74595	0.435697	0.862512
93ab996e3be1277	17	negative	0	0	0
a3b4831ad7c3b54	10	negative	0	0	0
c404ea4303d936b	13	negative	0	0	0
385b395bec24f2e	11	negative	0	0	0
e63765667af5f86	14	negative	0	0	0
5a800da95ab2f2f	3	negative	0	0	0
05f1fd2e263d56a	2	negative	0	0	0
f83c08d78735319	14	negative	0	0	0
111d3ea3a6b441d	1	negative	0	0	0																not_detected	not_detected	not_detected	not_detected	not_detected	not_detected		not_detected	not_detected	not_detected	not_detected	not_detected	not_detected	not_detected	detected	not_detected	not_detected	not_detected
208603c38b44fdc	14	negative	0	0	0																not_detected	not_detected	not_detected	not_detected	not_detected	not_detected		not_detected	not_detected	not_detected	not_detected	not_detected	not_detected	not_detected	detected	not_detected	not_detected	not_detected
29ef747d744654f	12	negative	0	0	0
4336fa48a13aea5	8	negative	0	0	0	-0.63325	-0.836868	1.3543	0.122869	-0.127191	0.122198	-1.05037	0.564911	-0.529226	-1.28543	0.133698	-0.975493	-0.43035	2.82473																				0.0856705	0.304858	-0.283012	-0.391262	0.188535	-0.575008
33f08cc3e1d4c76	16	negative	0	0	0	-0.244145	-0.33562	-0.253615	0.235063	-0.426907	-1.28509	-0.452899	0.857105	-0.223767	0.178175	-0.161278	0.406546	-0.35156	0.171035		not_detected	not_detected	not_detected	not_detected	not_detected	detected		not_detected	not_detected	not_detected	not_detected	not_detected	not_detected	not_detected	not_detected	not_detected	not_detected	not_detected	1.4624		-0.380375
4a5933197909c83	2	negative	0	0	0
21c3d708c14f504	2	negative	0	0	0
ccbe885a7d7179e	8	negative	0	0	0
67929268573011e	4	negative	0	0	0	0.465401	0.60422	-0.668155	-0.325903	-0.0390385	-0.517481	0.642463	-0.73187	-0.529226	1.11906	0.892207	0.887256	2.85255	0.347948	-0.716053	not_detected	not_detected	not_detected	not_detected	not_detected	detected		not_detected	not_detected	not_detected	not_detected	not_detected	not_detected	not_detected	not_detected	not_detected	not_detected	not_detected	-0.471579	0.155991	0.18791	-0.804794	-0.80011	-0.934388
01f7e1bd26ff70d	1	negative	0	0	0
249d7d1543d88fe	0	negative	0	0	0
54281bc71ad22a5	0	negative	0	0	0
285a21a764ec3a8	13	negative	0	0	0																not_detected	not_detected	not_detected	not_detected	not_detected	not_detected		not_detected	not_detected	not_detected	not_detected	not_detected	not_detected	not_detected	not_detected	not_detected	not_detected	not_detected
c6247c55c12e426	15	negative	0	0	0
dccd77fc9677d1b	16	negative	0	0	0
eab40b8e3c38d85	1	negative	0	0	0
5a8f701b84d99b7	2	negative	0	0	0
5f5ac0ea6817cc2	16	negative	0	0	0																																								negative	negative
5c3af5fe178f117	5	negative	0	0	0																not_detected	not_detected	not_detected	not_detected	not_detected	not_detected		not_detected	not_detected	not_detected	not_detected	not_detected	not_detected	detected	not_detected	not_detected	not_detected	not_detected
b8842c6bbb7b72f	14	negative	0	0	0
a42cc995f86026f	6	negative	0	0	0																not_detected	not_detected	not_detected	not_detected	not_detected	not_detected		not_detected	not_detected	not_detected	not_detected	not_detected	not_detected	not_detected	not_detected	not_detected	not_detected	not_detected
77c067470b48a3d	6	negative	0	0	0																not_detected	not_detected	not_detected	not_detected	not_detected	not_detected		not_detected	not_detected	not_detected	not_detected	not_detected	not_detected	not_detected	not_detected	not_detected	not_detected	not_detected
24be7bc187eee02	17	negative	0	0	0																not_detected	not_detected	detected	not_detected	not_detected	not_detected		not_detected	not_detected	not_detected	not_detected	not_detected	not_detected	not_detected	not_detected	not_detected	not_detected	not_detected
83396453232e42e	5	negative	0	0	0
13f85ed24fe2f0f	1	negative	0	0	0																not_detected	not_detected	not_detected	not_detected	not_detected	not_detected		not_detected	not_detected	not_detected	not_detected	not_detected	not_detected	not_detected	detected	not_detected	not_detected	not_detected
9224cf3f23ccd86	9	negative	0	0	0																not_detected	not_detected	not_detected	not_detected	not_detected	not_detected		not_detected	not_detected	not_detected	not_detected	not_detected	not_detected	not_detected	not_detected	not_detected	not_detected	not_detected
5806e354e45ab46	6	negative	0	0	0	-0.0381476	0.165628	0.914633	0.122869	-0.515058	1.31626	0.841616	0.0445292	0.99807	1.27588	0.133698	1.00743	-0.456613	-0.801985		not_detected	not_detected	not_detected	not_detected	not_detected	not_detected		not_detected	not_detected	not_detected	not_detected	not_detected	not_detected	not_detected	not_detected	not_detected	not_detected	not_detected	-1.12717	0.453725		-0.529106	0.435697	0.143752	negative	negative
6f923a840d935ac	12	negative	0	0	0
385f33616dbb4cb	2	negative	0	0	0																not_detected	not_detected	not_detected	not_detected	not_detected	not_detected		not_detected	not_detected	not_detected	not_detected	not_detected	not_detected	not_detected	not_detected	not_detected	not_detected	not_detected							negative	negative
8225fc11e98fd82	3	negative	0	0	0
778f5a165a79161	10	negative	0	0	0
51154f6d034f97f	18	negative	0	0	0																not_detected	not_detected	detected	not_detected	not_detected	not_detected		not_detected	not_detected	not_detected	not_detected	not_detected	not_detected	not_detected	not_detected	not_detected	not_detected	not_detected
2ac88cc402323c0	1	negative	0	0	0																not_detected	not_detected	not_detected	not_detected	not_detected	not_detected		not_detected	not_detected	not_detected	not_detected	not_detected	not_detected	not_detected	not_detected	not_detected	not_detected	not_detected							negative	negative
78b93760026b1fe	15	negative	0	0	0
1a4bf17e37ebd6e	6	negative	0	0	0
fcbfaa06ae76ffb	0	negative	0	0	0	-1.31991	-1.02484	-0.0526261	-0.438097	-0.303494	-1.23392	0.941197	2.01475	-0.529226	-1.3377	-0.793368	-1.93691	1.82829	0.171035		not_detected	not_detected	not_detected	not_detected	not_detected	detected		not_detected	not_detected	not_detected	not_detected	not_detected	not_detected	not_detected	not_detected	not_detected	not_detected	not_detected	0.864181		0.146183				negative	negative
0c78cd1194d1263	5	negative	0	0	0																detected	not_detected	not_detected	not_detected	not_detected	not_detected		not_detected	not_detected	not_detected	not_detected	not_detected	not_detected	not_detected	not_detected	not_detected	not_detected	not_detected
1c34ccfb9c9fdf1	17	negative	0	0	0
11aa3a40ca1b83c	15	negative	0	0	0																not_detected	not_detected	not_detected	not_detected	not_detected	not_detected		not_detected	detected	not_detected	not_detected	not_detected	not_detected	not_detected	not_detected	not_detected	not_detected	not_detected
b16b49f7bd3e692	10	positive	0	0	0																not_detected	not_detected	not_detected	not_detected	not_detected	not_detected		not_detected	not_detected	not_detected	not_detected	not_detected	not_detected	not_detected	not_detected	not_detected	not_detected	not_detected
89f3648e6540d64	15	negative	0	0	0
fd750ae8fcf67f7	17	negative	0	0	0
0c7a705a4f67668	16	negative	0	0	0
9667c91c345238f	4	negative	0	0	0
b1f398605ae3556	2	negative	0	0	0																																								negative	negative
fc73fb96f27962a	9	negative	0	0	0	-1.61746	-1.40077	-0.102873	0.459449	-1.36132	-0.70512	0.542882	0.548215	-0.529226	0.0213606	-0.793368	-0.254428	0.252494	-0.536617	-0.352639	not_detected	not_detected	not_detected	not_detected	not_detected	detected		not_detected	not_detected	not_detected	not_detected	not_detected	not_detected	not_detected	not_detected	not_detected	not_detected	not_detected	0.847791	-0.365042	-0.279038	-0.701411	0.682859	-1.29377
79696d7a81ff5dd	4	negative	0	0	0	-0.289922	-0.0849959	-0.0903115	-0.325903	-0.215342	-0.449248	0.74204	0.0139186	0.387152	0.230447	0.260116	-0.15428	0.935337	-0.18279		not_detected	not_detected	detected	not_detected	not_detected	detected		not_detected	not_detected	not_detected	not_detected	not_detected	not_detected	not_detected	not_detected	not_detected	not_detected	not_detected	0.159424	-0.365042		-0.563567	0.682859	-0.934388	negative	negative	-0.0355278	-0.239617	-0.35307
dc0729d450c6248	7	negative	0	0	0
5cf607c10aef72b	11	negative	0	0	0
a35fefd65ecf81a	7	negative	0	0	0
13add670047b4fa	14	negative	0	0	0																not_detected	not_detected	not_detected	not_detected	not_detected	not_detected		not_detected	not_detected	not_detected	not_detected	not_detected	not_detected	not_detected	detected	not_detected	not_detected	not_detected
8188e845df01eec	2	negative	0	0	0
53f19ace08ffce2	17	negative	0	0	0																not_detected	not_detected	not_detected	not_detected	not_detected	not_detected		not_detected	not_detected	not_detected	not_detected	not_detected	not_detected	not_detected	not_detected	not_detected	not_detected	not_detected
f0e23211fc31589	19	negative	0	0	0
2938e6daac5f95f	17	negative	0	0	0																not_detected	not_detected	not_detected	not_detected	not_detected	not_detected		not_detected	not_detected	not_detected	not_detected	not_detected	not_detected	not_detected	not_detected	not_detected	not_detected	not_detected
a957b6bb91f9df1	3	negative	0	0	0																not_detected	not_detected	not_detected	not_detected	not_detected	not_detected		not_detected	not_detected	not_detected	not_detected	not_detected	not_detected	not_detected	not_detected	not_detected	not_detected	not_detected
1586e1c2e2db05e	3	negative	0	0	0
d8a06bfe0308437	16	negative	0	0	0
b2a00e56192bb01	3	negative	0	0	0
6a468cfbc38db1f	12	negative	0	0	0																not_detected	not_detected	not_detected	not_detected	not_detected	not_detected		not_detected	not_detected	not_detected	not_detected	not_detected	not_detected	not_detected	not_detected	not_detected	not_detected	not_detected
902fa795b113a0d	13	negative	0	0	0																not_detected	not_detected	not_detected	not_detected	not_detected	not_detected		not_detected	not_detected	not_detected	not_detected	not_detected	not_detected	not_detected	not_detected	not_detected	not_detected	not_detected
288fd126080fcf2	1	negative	0	0	0																not_detected	not_detected	not_detected	not_detected	not_detected	not_detected		not_detected	not_detected	not_detected	not_detected	not_detected	not_detected	not_detected	not_detected	not_detected	detected	not_detected
e382fecd8c187b9	1	negative	0	0	0																not_detected	not_detected	not_detected	not_detected	not_detected	not_detected		not_detected	not_detected	not_detected	not_detected	not_detected	not_detected	not_detected	not_detected	not_detected	not_detected	not_detected
a4aa054da238156	3	negative	0	0	0																not_detected	not_detected	not_detected	not_detected	not_detected	not_detected		not_detected	not_detected	not_detected	not_detected	not_detected	not_detected	not_detected	not_detected	not_detected	not_detected	not_detected
c8de6a75ad8d0b3	0	negative	0	0	0
f37d64267f1b676	1	negative	0	0	0
51fe0c0546ec719	13	negative	0	0	0
9ce028193ccee99	5	negative	0	0	0
5661a11696b68f7	13	negative	0	0	0
1f9ef4c4c5cc30f	18	negative	0	1	0	1.35805	1.35609	-0.228491	-0.438097	1.1422	-0.517481	0.244149	0.275501	-0.223767	0.178175	-0.793368	0.0660446	0.987864	-0.0058775	-0.322355																			0.429854		1.17943	0.366879	-1.54159	1.22189
007e07fbff3752b	7	negative	0	0	0
904e31977da1b70	7	negative	0	0	0
7cf74d48c20cb21	13	negative	0	0	0
666c64b10551d23	5	negative	0	0	0																not_detected	not_detected	not_detected	not_detected	not_detected	detected		not_detected	not_detected	not_detected	not_detected	not_detected	not_detected	detected	not_detected	not_detected	not_detected	not_detected
513e32fee288527	17	negative	0	0	0																not_detected	not_detected	not_detected	not_detected	not_detected	not_detected		not_detected	not_detected	not_detected	not_detected	not_detected	not_detected	not_detected	not_detected	not_detected	detected	not_detected
49b730d08f38293	1	negative	0	0	0																not_detected	not_detected	not_detected	not_detected	not_detected	not_detected		not_detected	not_detected	not_detected	not_detected	not_detected	not_detected	not_detected	not_detected	not_detected	not_detected	not_detected
3848f0e537d4d4e	1	negative	0	0	0
167ca2baa8c2d77	4	negative	0	0	0
94946028e75d0b9	11	negative	0	0	0	-0.106813	0.353596	-0.994762	1.35699	0.0138521	-0.773352	1.8374	-0.428545	2.52537	0.544077	0.850067	-0.274459	1.14544	-1.24427		not_detected	not_detected	not_detected	not_detected	not_detected	not_detected		not_detected	not_detected	not_detected	not_detected	not_detected	not_detected	not_detected	detected	not_detected	not_detected	not_detected	0.233178	0.230425		0.0911916	-1.04727	0.862512	negative	negative
c78b71b90c3082d	2	negative	0	0	0
43bba318a18e50b	11	negative	0	0	0
1b5346b43cf5055	14	negative	0	0	0																not_detected	not_detected	not_detected	not_detected	not_detected	detected		not_detected	not_detected	not_detected	not_detected	not_detected	not_detected	not_detected	not_detected	not_detected	not_detected	not_detected
bd2742d16aad0b1	2	negative	0	0	0
a83e83fca06c338	9	negative	0	0	0
d28792d92063937	17	negative	0	0	0
d9452ee84db9ba8	17	negative	0	0	0
520959bcd10c81a	9	negative	0	0	0	-0.495919	-0.33562	1.40454	-0.55029	-0.127191	1.16274	0.542882	-0.659517	0.0816925	-0.396813	0.302256	-0.715108	0.672705	-0.536617	-0.473777	not_detected	not_detected	not_detected	not_detected	not_detected	not_detected		not_detected	not_detected	not_detected	not_detected	not_detected	not_detected	not_detected	not_detected	not_detected	not_detected	not_detected	-1.30745	-0.662776	-0.521453	-0.804794	-0.305787	0.143752			-0.614386	-0.704122	-0.465377
2d7a614ba9e594e	13	negative	0	0	0
a135b040ff1f52a	9	negative	0	0	0	-1.48013	-1.52608	0.0227448	-0.101517	-1.39658	-0.824526	-0.652057	0.114099	0.0816925	-0.187727	-0.540532	0.126132	1.19797	-0.536617																				0.601946		-0.328713				negative	negative
4a1313df764eba3	7	negative	0	0	0																not_detected	not_detected	not_detected	not_detected	not_detected	not_detected		not_detected	not_detected	not_detected	not_detected	not_detected	not_detected	not_detected	detected	not_detected	not_detected	not_detected
0f3f18df4c21a66	18	negative	0	0	0																not_detected	not_detected	not_detected	not_detected	not_detected	detected		not_detected	not_detected	not_detected	not_detected	not_detected	not_detected	not_detected	not_detected	not_detected	not_detected	not_detected
3d3a60329e09e0c	9	negative	0	0	0																																								negative	negative
ba9f9df1fc2005d	12	negative	0	0	0
205f4a5cf3f3ae4	6	negative	0	0	0	0.144961	0.353596	0.537779	-0.55029	0.0138521	-1.77978	0.841616	0.122447	-1.14014	0.544077	-0.835508	0.186222	-1.00814	-0.713529																						-0.521453	-0.839255			negative	negative
4382f5ea05e60c4	2	positive	0	0	0	0.991838	0.792188	-0.341548	1.46919	1.65348	-0.0483833	-0.452899	-0.420197	1.30353	-1.44225	-0.498393	-1.39611	1.93334	0.967144		not_detected	not_detected	not_detected	not_detected	not_detected	not_detected		not_detected	not_detected	not_detected	not_detected	not_detected	not_detected	not_detected	not_detected	not_detected	not_detected	not_detected	-0.414215	-0.513909		-0.32234	-0.0586259	0.143752			-0.504127	-0.317035	-0.330608
c41a3a1d0238ea2	14	negative	0	0	0																not_detected	not_detected	not_detected	not_detected	not_detected	not_detected		not_detected	not_detected	not_detected	detected	not_detected	not_detected	not_detected	detected	not_detected	not_detected	not_detected
319de045a71a568	10	negative	0	0	0	-0.0610358	-0.272964	0.738768	-0.999063	-0.850035	1.36744	-0.85121	-0.653951	3.13628	1.17134	3.50485	1.78859	-0.404086	-0.978899	-0.504062																			-1.8729	-0.588343	-0.493635	-0.66695	1.91867	-0.575008				-0.47187
5925f5cbc2fa6c6	16	negative	0	0	0
0716648a7fa58a6	3	negative	0	0	0																not_detected	not_detected	not_detected	not_detected	not_detected	not_detected		not_detected	not_detected	not_detected	not_detected	not_detected	not_detected	not_detected	not_detected	not_detected	not_detected	not_detected
0db34a7c845e57a	13	negative	0	0	0																not_detected	detected	not_detected	not_detected	not_detected	not_detected		not_detected	not_detected	not_detected	not_detected	not_detected	not_detected	not_detected	not_detected	not_detected	not_detected	not_detected
0ecac021e9c4511	17	negative	0	0	0																not_detected	not_detected	not_detected	not_detected	not_detected	not_detected		not_detected	not_detected	not_detected	not_detected	not_detected	not_detected	not_detected	not_detected	not_detected	not_detected	not_detected
25ab118504a09df	2	negative	0	0	0																not_detected	not_detected	detected	not_detected	not_detected	detected		not_detected	not_detected	not_detected	not_detected	not_detected	not_detected	not_detected	not_detected	not_detected	not_detected	not_detected							positive	negative
713f1426f544d25	17	negative	0	0	0	1.51828	1.41875	0.123239	-0.662483	1.79452	0.292779	-0.0545852	-0.709607	0.692611	-0.710443	0.175837	-0.815256	-0.35156	-0.359703																				-0.143785		-0.511518
8fbab475b563945	1	negative	0	0	0
a148c205f14e0d9	13	negative	0	0	0
4066ea10c81f47f	18	negative	0	0	0
5296e03e7097898	15	negative	0	0	0	0.534067	0.854844	-0.178244	0.347255	0.472242	1.60625	1.33951	0.486993	-0.223767	0.544077	0.555092	-0.0541324	-0.404086	0.259492		not_detected	not_detected	not_detected	not_detected	not_detected	detected		not_detected	not_detected	not_detected	not_detected	not_detected	not_detected	not_detected	not_detected	not_detected	not_detected	not_detected	-1.43857		-0.499596
3467ff57e22ce17	15	negative	0	0	0																not_detected	not_detected	detected	not_detected	not_detected	not_detected		not_detected	not_detected	not_detected	not_detected	not_detected	not_detected	not_detected	not_detected	not_detected	not_detected	not_detected
c97bcb9486245aa	14	negative	0	0	0																																								negative	negative
7bef4fce28aa771	3	negative	0	0	0																not_detected	detected	not_detected	not_detected	not_detected	not_detected		not_detected	not_detected	not_detected	not_detected	not_detected	not_detected	not_detected	not_detected	not_detected	not_detected	not_detected
af94b333899af73	3	negative	0	0	0
0f24d9238751646	1	negative	0	0	0
fddc6c17ceed9e5	8	negative	0	0	0																not_detected	not_detected	not_detected	not_detected	not_detected	not_detected		not_detected	not_detected	not_detected	not_detected	not_detected	not_detected	not_detected	not_detected	not_detected	not_detected	not_detected
2e27d4f6d7c2379	11	negative	0	0	0																not_detected	not_detected	not_detected	not_detected	not_detected	not_detected		not_detected	not_detected	not_detected	not_detected	not_detected	not_detected	not_detected	not_detected	not_detected	not_detected	not_detected
15196c389ebaee0	19	negative	0	0	0
55cca9a15f0d026	19	negative	0	0	0
62df25b1cbced0a	2	negative	0	0	0
eef77fe3902ff79	7	negative	0	0	0
077b7b2e45cc873	12	negative	0	0	0																not_detected	not_detected	not_detected	not_detected	not_detected	not_detected		not_detected	not_detected	not_detected	not_detected	not_detected	not_detected	not_detected	not_detected	not_detected	not_detected	not_detected
c12c4d640076c35	12	negative	0	0	0
380a1dfaff60443	11	negative	0	0	0																not_detected	not_detected	not_detected	not_detected	not_detected	not_detected		not_detected	not_detected	not_detected	not_detected	not_detected	not_detected	not_detected	not_detected	not_detected	not_detected	not_detected
b62efc1c0e04914	7	negative	0	0	0
1726d727728140e	14	negative	0	0	0
1ff6473138a5124	0	negative	0	0	0
9428396b6745f35	10	negative	0	0	0																not_detected	not_detected	not_detected	not_detected	not_detected	not_detected		not_detected	not_detected	not_detected	not_detected	not_detected	not_detected	not_detected	not_detected	not_detected	not_detected	not_detected
30ab7f7453e1987	11	negative	0	0	0
01f456822d76db2	7	negative	0	0	0
63e4f0cc133133e	9	negative	0	0	0																not_detected	not_detected	not_detected	not_detected	not_detected	detected		not_detected	not_detected	not_detected	not_detected	not_detected	not_detected	not_detected	not_detected	not_detected	not_detected	not_detected
0aee9e37aa5a390	13	negative	0	0	0
4b04107bcd8cbd2	1	negative	0	0	0
b610ae293a34d6a	1	negative	0	0	0
d3ba1bc8cb1e1a9	6	negative	0	0	0
87dcac33807ed36	9	negative	0	0	0																not_detected	not_detected	not_detected	not_detected	not_detected	detected		not_detected	not_detected	not_detected	not_detected	not_detected	not_detected	not_detected	not_detected	not_detected	not_detected	not_detected
8c8ad0191f57b59	9	negative	0	0	0																not_detected	not_detected	not_detected	not_detected	not_detected	not_detected		detected	not_detected	not_detected	not_detected	not_detected	not_detected	not_detected	not_detected	not_detected	not_detected	not_detected
46cb1f1805fd08d	11	negative	0	0	0
fd44e150a1f4a58	14	negative	0	0	0
b17a1c961d2657e	2	negative	0	0	0
e229fc06b848a2f	1	negative	0	0	0
18dae391cd834b1	18	negative	0	0	0
513bdad75c84495	4	negative	0	0	0	-0.106813	-0.586244	-0.278739	-0.101517	0.38409	0.412185	-1.94657	-0.23375	0.0816925	-1.7036	0.470813	-1.01555	-0.0889278	0.259492	0.101628	detected	not_detected	not_detected	not_detected	not_detected	not_detected		not_detected	not_detected	not_detected	not_detected	not_detected	not_detected	not_detected	not_detected	not_detected	not_detected	not_detected	-0.381436	0.081558	-0.441973	1.26286	-0.80011	0.862512			-0.448998	-0.433161	-0.397992
8eb7bff499bb989	12	negative	0	0	0
5066ed89286bcf5	1	negative	0	0	0
edd4f8a0cd03492	2	negative	0	0	0
c5f91e7dec058c5	9	negative	0	0	0																not_detected	not_detected	not_detected	not_detected	not_detected	not_detected		not_detected	not_detected	not_detected	not_detected	not_detected	not_detected	not_detected	not_detected	not_detected	not_detected	not_detected
6184bcffcc20f56	17	negative	0	0	0																not_detected	not_detected	not_detected	not_detected	not_detected	detected		not_detected	not_detected	not_detected	not_detected	not_detected	not_detected	not_detected	not_detected	not_detected	not_detected	not_detected
3958266d427947a	17	negative	0	0	0	1.40383	1.54406	0.550341	-1.33564	1.38902	0.659527	0.74204	0.208714	1.30353	0.0736314	0.302256	-0.294488	-0.456613	0.171035																				-0.528943	-0.365042	-0.477739	0.0567305	0.93002	0.503132			0.984365	0.186179	-0.139686
bb78f85335e1b12	13	negative	0	0	0																																								negative	negative
5c3f58e25f728c0	11	negative	0	0	0																not_detected	not_detected	detected	not_detected	not_detected	not_detected		not_detected	not_detected	not_detected	not_detected	not_detected	not_detected	not_detected	not_detected	not_detected	not_detected	not_detected
05c205f15778e15	2	negative	0	0	0
5f08a0b944723f4	2	negative	0	0	0																not_detected	not_detected	not_detected	not_detected	not_detected	detected		not_detected	not_detected	not_detected	not_detected	not_detected	not_detected	not_detected	not_detected	not_detected	not_detected	not_detected							negative	negative
2693a9cc1a3ecdd	6	negative	0	0	0																not_detected	not_detected	not_detected	not_detected	not_detected	not_detected		not_detected	not_detected	not_detected	not_detected	not_detected	not_detected	not_detected	not_detected	not_detected	not_detected	not_detected
6255b7cc1920169	18	negative	0	0	0																not_detected	not_detected	not_detected	not_detected	not_detected	detected		not_detected	not_detected	not_detected	not_detected	not_detected	not_detected	not_detected	not_detected	not_detected	not_detected	not_detected
51b6f448bb7dc9f	15	negative	0	0	0
6c6ee3dc2099d3c	6	negative	0	0	0
6027722793bc89f	11	negative	0	0	0
a9913858baaafe7	17	negative	0	0	0																not_detected	not_detected	not_detected	not_detected	not_detected	not_detected		not_detected	not_detected	not_detected	not_detected	not_detected	not_detected	not_detected	not_detected	not_detected	not_detected	not_detected
296eb90a0e4f286	0	negative	0	0	0																not_detected	not_detected	not_detected	not_detected	not_detected	not_detected		not_detected	not_detected	not_detected	not_detected	not_detected	not_detected	not_detected	not_detected	not_detected	not_detected	not_detected
88cfa34b38dfb23	3	negative	0	0	0																not_detected	not_detected	not_detected	not_detected	not_detected	not_detected		not_detected	not_detected	not_detected	not_detected	not_detected	not_detected	not_detected	not_detected	not_detected	not_detected	not_detected							negative	negative
ad164db8a084e45	14	negative	0	0	0
fc91612afe06c51	10	negative	0	0	0
0ea8803781fb22e	6	negative	0	0	0																not_detected	not_detected	not_detected	not_detected	not_detected	not_detected		not_detected	not_detected	not_detected	not_detected	not_detected	not_detected	not_detected	not_detected	not_detected	not_detected	not_detected
e8cd73daf06f3df	10	negative	0	0	0																not_detected	not_detected	not_detected	not_detected	not_detected	not_detected		not_detected	not_detected	not_detected	not_detected	not_detected	not_detected	not_detected	detected	not_detected	not_detected	not_detected
8037d4efdfe9bc2	10	negative	0	0	0																not_detected	not_detected	not_detected	not_detected	not_detected	not_detected		not_detected	not_detected	not_detected	not_detected	not_detected	not_detected	not_detected	detected	not_detected	not_detected	not_detected
02bfb64a6093b4f	3	negative	0	0	0																																								negative	negative
9a5be3459f8cefb	2	negative	0	0	0																																								negative	negative
5824d1a9e16518b	13	negative	0	0	0																not_detected	not_detected	not_detected	not_detected	not_detected	not_detected		not_detected	not_detected	not_detected	not_detected	not_detected	not_detected	not_detected	detected	not_detected	not_detected	not_detected
d0ddb85f863bc37	11	negative	0	0	0	0.579844	0.854844	-0.479728	-0.101517	0.771958	-0.500423	1.14035	-0.598296	-1.14014	0.0213606	0.428674	-0.534842	0.567652	0.524862		not_detected	not_detected	not_detected	not_detected	not_detected	not_detected		not_detected	not_detected	not_detected	not_detected	not_detected	not_detected	not_detected	not_detected	not_detected	not_detected	not_detected		-0.439476	-0.461843	-0.253418	2.16583	-0.215628			-0.145786	0.14747
2b575d89ee59d4c	9	negative	0	0	0																																								negative	negative
0835169097d077d	13	negative	0	0	0																not_detected	not_detected	not_detected	not_detected	not_detected	not_detected		not_detected	not_detected	not_detected	not_detected	not_detected	not_detected	not_detected	not_detected	not_detected	not_detected	not_detected
256b99b29beb5d9	9	negative	0	0	0
f41239fd3a79156	1	negative	0	0	0																not_detected	not_detected	not_detected	not_detected	not_detected	detected		not_detected	not_detected	not_detected	not_detected	not_detected	not_detected	not_detected	not_detected	not_detected	not_detected	not_detected
6a8cac1b1e2b246	8	negative	0	0	0																not_detected	detected	not_detected	not_detected	not_detected	not_detected		not_detected	not_detected	not_detected	not_detected	not_detected	not_detected	not_detected	not_detected	not_detected	not_detected	not_detected
7e65833c1e519bf	19	negative	0	0	0
6f668ff6a8bf185	9	negative	0	0	0
e5a73bb9bcea9de	0	negative	0	0	0																not_detected	not_detected	not_detected	not_detected	not_detected	not_detected		not_detected	not_detected	not_detected	detected	not_detected	not_detected	not_detected	not_detected	not_detected	not_detected	not_detected							negative	negative
fb1653982631325	13	negative	0	0	0																not_detected	not_detected	not_detected	not_detected	not_detected	not_detected		not_detected	not_detected	not_detected	not_detected	not_detected	not_detected	detected	not_detected	not_detected	not_detected	not_detected
f35358b40e06bb3	11	negative	0	0	0
c70ef288c8dafb8	4	negative	0	0	0
7757f8fe719a810	4	negative	0	0	0
c8aef3bc4a48d46	0	negative	0	0	0																not_detected	not_detected	not_detected	not_detected	not_detected	not_detected		not_detected	not_detected	not_detected	not_detected	not_detected	not_detected	not_detected	detected	not_detected	not_detected	not_detected							negative	positive
02caeba12dc4ea5	2	negative	0	0	0																																								positive	negative
c34528291b61996	0	negative	1	0	0
a084dbb251369e8	9	negative	0	0	0
24a18a1594b6c5b	0	negative	0	0	0																not_detected	not_detected	not_detected	not_detected	detected	detected		not_detected	not_detected	not_detected	detected	not_detected	not_detected	not_detected	not_detected	not_detected	not_detected	not_detected
6ece41ff3c43cd8	12	negative	0	0	0																not_detected	not_detected	not_detected	not_detected	not_detected	not_detected		not_detected	not_detected	not_detected	not_detected	not_detected	not_detected	not_detected	not_detected	not_detected	not_detected	not_detected
439b83d36c9313a	4	negative	0	0	0																not_detected	not_detected	not_detected	not_detected	not_detected	not_detected		not_detected	not_detected	not_detected	not_detected	not_detected	not_detected	not_detected	not_detected	not_detected	not_detected	not_detected
af1a5015f42f084	17	negative	0	0	0
0962eda22787a50	8	negative	0	0	0
e76d6a5ff75e526	7	negative	0	0	0																not_detected	not_detected	not_detected	not_detected	not_detected	not_detected		not_detected	not_detected	not_detected	not_detected	not_detected	not_detected	not_detected	not_detected	not_detected	not_detected	not_detected
b41882de14f32e3	13	negative	0	0	0	2.13627	2.4839	0.675959	1.35699	1.56532	0.540121	1.53866	1.0686	4.66358	1.22361	0.175837	0.546754	0.30502	0.259492		not_detected	not_detected	not_detected	not_detected	not_detected	not_detected		not_detected	not_detected	not_detected	not_detected	not_detected	not_detected	not_detected	not_detected	not_detected	not_detected	not_detected	-0.799373
c8ee81f2d9f0e35	2	negative	0	0	0																																								negative	negative
c62ba2b10f39cd3	16	negative	0	0	0	0.488289	0.666876	0.072992	-0.999063	0.436981	-0.457777	0.74204	1.0686	0.692611	0.282719	-0.287696	-0.0541324	0.0161249	0.347948	-0.0800791	not_detected	not_detected	not_detected	not_detected	not_detected	not_detected		detected	not_detected	not_detected	not_detected	not_detected	not_detected	not_detected	not_detected	not_detected	not_detected	not_detected	0.552776	-0.439476	-0.477739	0.40134	0.188535	0.143752			0.267684	-0.317035
b5c223d6ca1cef9	2	negative	0	0	0																																								negative	negative
7,59895E+14	15	negative	0	0	0
e946fd1968d0c6b	11	negative	0	0	0
215dedaca7cf2a9	13	negative	0	0	0
27d70c1e45b3d77	14	negative	0	0	0
0f2c3bd3954f19e	7	negative	0	1	0	-0.289922	-0.33562	0.223734	-0.213711	-0.673732	-0.585713	-0.253742	-0.69291	0.0816925	0.648619	0.470813	0.887256	0.672705	0.259492		not_detected	not_detected	not_detected	not_detected	not_detected	detected		not_detected	not_detected	not_detected	not_detected	not_detected	not_detected	not_detected	not_detected	not_detected	not_detected	not_detected	0.339711	-0.811643	-0.461843	-0.632489	-0.80011	0.862512	negative	negative	0.102296	-0.1622
1277c061be97a35	19	negative	0	0	0
1f526af188d8056	0	negative	0	0	0																not_detected	not_detected	not_detected	not_detected	not_detected	detected		not_detected	not_detected	not_detected	not_detected	not_detected	not_detected	not_detected	not_detected	not_detected	not_detected	not_detected
4f7ad03d81abafc	19	negative	0	0	0	-0.862136	-0.774212	-2.27607	0.347255	-1.0616	0.0966106	0.144572	-1.82829	1.91445	0.648619	-0.835508	0.646902	1.09292	1.23251																					-0.588343	-0.247246	-0.66695			negative	negative	0.405507	3.05063
db634c9e140a3f0	16	negative	0	0	0
d3729cd2658ca64	15	positive	0	0	0
49461a45bf0c0f9	2	negative	0	0	0																not_detected	not_detected	not_detected	not_detected	not_detected	not_detected		not_detected	not_detected	not_detected	not_detected	not_detected	not_detected	not_detected	not_detected	not_detected	not_detected	not_detected
ba76c1521c397c0	17	negative	0	0	0
5d2001ece3a1e25	9	negative	0	0	0																not_detected	not_detected	not_detected	not_detected	not_detected	not_detected		not_detected	not_detected	not_detected	not_detected	not_detected	not_detected	not_detected	not_detected	not_detected	not_detected	not_detected
6e65dc2a87e134f	18	negative	0	0	0
60ad659a94fbd83	15	negative	0	0	0	0.534067	0.416252	0.248857	-0.55029	0.38409	-0.918346	-0.253742	-0.645603	0.387152	-0.0309113	-0.456253	0.126132	1.01413	-0.271247	-0.352639																			0.724869		-0.0843106	-0.253418	-0.0586259	1.22189	negative	positive
7230c0e06498ce3	19	negative	0	0	0
9fa33e259bacf52	4	negative	0	0	0
6ec7a46d8cc86fe	17	negative	0	0	0
631e671e4c66721	0	negative	0	0	0
61176b923363239	9	negative	0	0	0	-1.75479	-1.71405	0.33679	0.0106766	-2.17231	-0.747765	-0.353319	1.42479	-0.834685	1.32815	-0.498393	1.64838	-0.798034	-0.536617	-0.867475	not_detected	not_detected	not_detected	not_detected	not_detected	detected		not_detected	not_detected	not_detected	not_detected	not_detected	not_detected	not_detected	not_detected	not_detected	not_detected	not_detected	1.16739	-0.811643	-0.372427	-1.11494	-1.04727	-1.29377			-0.228481	-0.200909
99a1d4e43474695	8	negative	0	0	0																not_detected	not_detected	not_detected	not_detected	detected	not_detected		not_detected	not_detected	not_detected	not_detected	not_detected	not_detected	not_detected	not_detected	not_detected	not_detected	not_detected
1018210b47dcae4	11	negative	0	0	0																not_detected	not_detected	not_detected	not_detected	not_detected	detected		not_detected	not_detected	not_detected	not_detected	not_detected	not_detected	not_detected	not_detected	not_detected	not_detected	not_detected
b548e1f443dec9a	13	negative	0	0	0																not_detected	not_detected	not_detected	not_detected	not_detected	detected		not_detected	not_detected	not_detected	not_detected	not_detected	not_detected	not_detected	not_detected	not_detected	not_detected	not_detected
19795d2feaf0e53	15	negative	0	0	0
101ac69a00c5409	17	negative	0	0	0
4b8e26ec9ac6a73	8	negative	0	0	0
757184aab957071	11	negative	0	0	0	1.2665	1.29344	-0.228491	-0.55029	0.87774	0.81305	0.343725	-0.389586	0.692611	0.544077	0.175837	0.426576	-0.535402	-0.625073																				-0.586307	-0.439476	-0.521453	0.987177	-0.0586259	0.143752			-0.118222	-0.0460737
ce8d8b8c7f03a8e	6	negative	0	0	0
d18be58766bb8ca	17	negative	0	0	0
b24d08efa988dd1	14	negative	0	0	0	0.923173	1.29344	0.512655	-0.325903	1.28324	-0.636887	1.53866	0.370116	0.0816925	-0.135455	-0.329835	-0.875345	-1.08693	-0.44816																				1.09364	0.602592		0.194574	-0.552949	0.503132			-0.311175	-0.47187	-0.341839
0a63456bb195131	17	negative	0	0	0																not_detected	not_detected	not_detected	not_detected	not_detected	not_detected		not_detected	not_detected	not_detected	not_detected	not_detected	not_detected	not_detected	not_detected	not_detected	not_detected	not_detected
3e4124fe513afdf	9	negative	0	0	0
5bbf3302a6a5845	18	negative	0	0	0
a43988bb21e8d43	2	negative	0	0	0																not_detected	not_detected	detected	not_detected	not_detected	not_detected		not_detected	not_detected	not_detected	not_detected	not_detected	not_detected	not_detected	not_detected	not_detected	not_detected	not_detected
c9ee2fc28e4e72c	5	negative	0	0	0
f4a9e8626b9f89f	6	negative	0	0	0																not_detected	not_detected	not_detected	not_detected	not_detected	not_detected		not_detected	not_detected	not_detected	not_detected	not_detected	not_detected	not_detected	not_detected	not_detected	detected	not_detected
50f9a122c814ff2	14	negative	0	0	0
ce0e18a3c48da1f	0	negative	0	0	0																not_detected	not_detected	not_detected	not_detected	not_detected	not_detected		not_detected	not_detected	not_detected	not_detected	not_detected	not_detected	not_detected	not_detected	not_detected	not_detected	not_detected
43c3fe8ecfbdfc9	7	negative	0	0	0																not_detected	not_detected	not_detected	not_detected	not_detected	not_detected		not_detected	not_detected	not_detected	not_detected	not_detected	not_detected	not_detected	not_detected	not_detected	not_detected	not_detected
243ba299a113ac8	18	negative	0	0	0
087d1440b4c30eb	14	negative	0	0	0
de1bcdaa0dbc348	6	negative	0	0	0																not_detected	not_detected	not_detected	not_detected	not_detected	not_detected		not_detected	not_detected	not_detected	not_detected	not_detected	not_detected	not_detected	not_detected	not_detected	not_detected	not_detected
e59bdcf528b6096	19	negative	0	0	0																																								negative	negative
03fd6282deaf293	2	negative	0	0	0																not_detected	not_detected	not_detected	not_detected	not_detected	not_detected		not_detected	not_detected	not_detected	not_detected	not_detected	not_detected	not_detected	detected	not_detected	not_detected	not_detected
9dcbe435ea0fdb7	13	negative	0	0	0																not_detected	not_detected	not_detected	not_detected	not_detected	not_detected		not_detected	not_detected	not_detected	not_detected	not_detected	not_detected	not_detected	not_detected	not_detected	not_detected	not_detected
b22b81e9fc8b606	13	negative	0	0	0
7e627735abfff6f	0	negative	0	0	0
c32a5aeaf15cb47	5	negative	0	0	0
b79e17f9e041222	9	negative	0	0	0
ee7c56a8a3b0be8	7	negative	0	0	0
361ac4cef684dc5	12	negative	0	0	0																not_detected	not_detected	not_detected	not_detected	not_detected	not_detected		not_detected	not_detected	not_detected	not_detected	not_detected	not_detected	not_detected	not_detected	not_detected	not_detected	not_detected
63bf14e6297d196	5	negative	0	0	0
040d42e604db84f	12	negative	0	0	0																not_detected	not_detected	not_detected	not_detected	not_detected	not_detected		not_detected	not_detected	not_detected	not_detected	not_detected	not_detected	not_detected	not_detected	not_detected	not_detected	not_detected
faf15bc39eb18d4	4	negative	0	0	0																not_detected	not_detected	not_detected	not_detected	not_detected	detected		not_detected	not_detected	not_detected	not_detected	not_detected	not_detected	not_detected	not_detected	not_detected	not_detected	not_detected
2953332ad8c611b	7	negative	0	0	0
e8481a007e1bba9	0	negative	0	0	0																not_detected	not_detected	not_detected	not_detected	not_detected	not_detected		not_detected	not_detected	not_detected	not_detected	not_detected	not_detected	not_detected	detected	not_detected	not_detected	not_detected							negative	negative
5bddf261959d722	2	negative	0	0	0																not_detected	not_detected	not_detected	not_detected	not_detected	not_detected		not_detected	not_detected	not_detected	not_detected	not_detected	not_detected	not_detected	not_detected	not_detected	not_detected	not_detected
d019cc187fd1994	2	negative	0	0	0																not_detected	not_detected	not_detected	not_detected	not_detected	detected		not_detected	not_detected	not_detected	not_detected	not_detected	not_detected	not_detected	not_detected	not_detected	not_detected	not_detected
fac5a687bd3adea	10	negative	0	0	0																detected	not_detected	not_detected	not_detected	not_detected	not_detected		not_detected	not_detected	not_detected	not_detected	not_detected	not_detected	not_detected	not_detected	not_detected	not_detected	not_detected
3a866e8c40423a2	1	negative	0	0	0																not_detected	not_detected	not_detected	not_detected	detected	not_detected		not_detected	not_detected	not_detected	not_detected	not_detected	not_detected	not_detected	not_detected	not_detected	not_detected	not_detected
c15931c7405c274	1	negative	0	0	0																not_detected	not_detected	not_detected	not_detected	not_detected	detected		not_detected	not_detected	not_detected	not_detected	not_detected	not_detected	not_detected	not_detected	not_detected	not_detected	not_detected
a418ccc0c7258ae	15	negative	0	0	0																not_detected	not_detected	not_detected	not_detected	not_detected	not_detected		not_detected	not_detected	not_detected	not_detected	not_detected	not_detected	not_detected	not_detected	not_detected	not_detected	not_detected
4dcc132aa88c43c	13	negative	0	0	0																not_detected	not_detected	not_detected	not_detected	detected	not_detected		not_detected	not_detected	not_detected	not_detected	not_detected	not_detected	not_detected	not_detected	not_detected	not_detected	not_detected
35ca00049e79068	18	negative	0	0	0	-0.495919	-0.523588	1.2538	0.0106766	-0.426907	2.06682	-0.253742	0.211497	0.692611	-0.187727	0.765789	-0.0941924	-0.456613	-0.713529																				-1.95485	0.602592	-0.509531	-0.356801	0.682859	1.58127			-0.118222	-0.355744	-0.0835329
e08d95f3881ca72	16	negative	0	0	0
31bad60781945d3	6	negative	0	0	0	0.16785	0.040316	0.638273	0.459449	0.666176	-0.909817	-0.452899	0.420206	0.692611	-1.12862	-0.624811	-1.05561	-0.640455	0.0825793	-0.170933	not_detected	not_detected	not_detected	not_detected	not_detected	not_detected		not_detected	not_detected	not_detected	not_detected	not_detected	not_detected	not_detected	detected	not_detected	not_detected	not_detected	1.25753	-0.0673088	-0.167765	-0.356801	-0.0586259	0.143752	negative	negative
13ad7c5d0260c1b	0	negative	0	0	0																not_detected	not_detected	not_detected	not_detected	not_detected	not_detected		not_detected	not_detected	not_detected	not_detected	not_detected	not_detected	not_detected	not_detected	not_detected	not_detected	not_detected
96eaaf024bc3b8f	14	negative	0	0	0
c6e707ce219bdc3	0	negative	0	0	0																																								negative	negative
9514c726737006c	10	negative	0	0	0
fcc66aed1a552c9	4	negative	0	0	0
fa55166875265f4	3	negative	0	0	0
412e783c5c0119e	17	negative	0	0	0	-2.05234	-2.08999	0.462408	0.571643	-2.36625	1.55508	-0.85121	-0.420197	-0.529226	0.962249	0.217977	1.50817	0.38381	-1.15581		not_detected	not_detected	not_detected	not_detected	not_detected	not_detected		not_detected	not_detected	not_detected	not_detected	not_detected	not_detected	not_detected	not_detected	not_detected	not_detected	not_detected	-1.56149	-0.216176		-0.632489	0.188535	-0.575008			-0.476563	-0.587996	-0.454146
0554d94a6479da1	9	negative	0	0	0																not_detected	not_detected	detected	not_detected	not_detected	not_detected		not_detected	not_detected	not_detected	not_detected	not_detected	not_detected	not_detected	not_detected	not_detected	not_detected	not_detected
d2b6411d5c42331	18	negative	0	0	0
0d0d518bcf26604	11	negative	0	0	0																not_detected	not_detected	not_detected	not_detected	not_detected	not_detected		not_detected	not_detected	not_detected	not_detected	not_detected	not_detected	not_detected	not_detected	not_detected	not_detected	not_detected
a37ff727e9562c2	2	negative	0	0	0
d4b4833f1144472	9	negative	0	0	0																not_detected	not_detected	not_detected	not_detected	not_detected	not_detected		not_detected	not_detected	not_detected	not_detected	not_detected	not_detected	not_detected	not_detected	not_detected	not_detected	not_detected							negative	negative
e63e505a824045c	17	negative	0	0	0
348d3ea3187b815	18	negative	0	0	0																																								negative	negative
7e1c8eb6251fac2	17	negative	0	0	0																not_detected	not_detected	not_detected	not_detected	not_detected	not_detected		not_detected	not_detected	not_detected	not_detected	not_detected	not_detected	not_detected	not_detected	not_detected	not_detected	not_detected
999799b2f10890b	0	negative	0	0	0
1c13eee2c5b3080	2	negative	0	0	0	-0.679027	-0.586244	0.575464	1.13261	-0.761883	0.267191	0.244149	-0.200356	0.387152	0.387261	2.99918	0.306399	-0.955614	-0.44816																				-0.496163
b5af5b2ad1679a9	9	negative	0	0	0
0026b35811a9267	15	negative	0	0	0
2e593847ef5493e	7	negative	0	0	0																not_detected	not_detected	not_detected	not_detected	not_detected	detected		not_detected	not_detected	not_detected	not_detected	not_detected	not_detected	not_detected	not_detected	not_detected	not_detected	not_detected
c874c9da09f7be9	19	negative	0	0	0																not_detected	not_detected	not_detected	not_detected	detected	not_detected		not_detected	not_detected	not_detected	not_detected	not_detected	not_detected	not_detected	not_detected	not_detected	not_detected	not_detected
f8b91965d5db038	14	negative	0	0	0																not_detected	not_detected	not_detected	not_detected	not_detected	not_detected		not_detected	not_detected	not_detected	not_detected	not_detected	not_detected	not_detected	not_detected	not_detected	not_detected	not_detected
ed03373b934c10b	1	negative	0	0	0																																								positive	negative
52c3dee8e280435	14	negative	0	0	0																not_detected	not_detected	not_detected	not_detected	not_detected	not_detected		not_detected	not_detected	not_detected	not_detected	not_detected	not_detected	not_detected	not_detected	not_detected	not_detected	not_detected
3ea26e9c895eed8	19	negative	0	0	0
566c67721ed38ec	11	negative	0	0	0																not_detected	not_detected	not_detected	not_detected	not_detected	not_detected		not_detected	not_detected	not_detected	not_detected	not_detected	not_detected	not_detected	not_detected	not_detected	not_detected	not_detected
f34ec1b6ca0c2ba	15	negative	0	0	0	0.877395	0.729532	-0.127997	-0.213711	0.683806	-1.19128	-0.353319	0.0974024	0.99807	-0.0309113	1.01863	0.146163	-0.404086	1.49788		not_detected	not_detected	not_detected	not_detected	not_detected	not_detected		not_detected	not_detected	not_detected	not_detected	not_detected	detected	not_detected	not_detected	not_detected	not_detected	not_detected	1.12642	-0.439476		0.40134
9ead87e2b989cd2	14	negative	0	0	0
11ba0ee6c35273e	11	negative	0	0	0
3cc297faaab80ec	2	negative	0	0	0	-0.381476	-0.460932	0.286543	-0.662483	-0.356385	2.14358	-0.452899	-0.286623	-1.14014	-0.187727	-0.414114	-0.0140739	-1.27077	-0.625073																					-0.141742	-0.535362	-0.563567	-0.0586259	1.22189	negative	negative	-0.559257	-0.549287
400aecdd7f1a825	13	negative	0	0	0																																								negative	negative
e9ceada97532d32	6	negative	0	0	0
90061e20fd3825d	0	negative	0	0	0																not_detected	not_detected	detected	not_detected	not_detected	detected		not_detected	not_detected	not_detected	not_detected	not_detected	not_detected	not_detected	not_detected	not_detected	not_detected	not_detected
6912fd50c64c477	2	negative	0	0	0																not_detected	not_detected	not_detected	not_detected	not_detected	not_detected		not_detected	not_detected	not_detected	not_detected	not_detected	not_detected	not_detected	not_detected	not_detected	not_detected	not_detected
19f0f8c88aabd2f	17	negative	0	0	0																not_detected	not_detected	not_detected	not_detected	not_detected	detected		not_detected	not_detected	not_detected	not_detected	not_detected	not_detected	not_detected	not_detected	not_detected	not_detected	not_detected
dda33f47d5c915c	11	negative	0	0	0																not_detected	not_detected	not_detected	not_detected	not_detected	detected		not_detected	not_detected	not_detected	not_detected	not_detected	not_detected	not_detected	not_detected	not_detected	not_detected	not_detected
4cfe3b62c4fa6e1	10	negative	0	0	0																not_detected	not_detected	not_detected	not_detected	not_detected	not_detected		not_detected	not_detected	not_detected	not_detected	not_detected	not_detected	not_detected	not_detected	not_detected	not_detected	not_detected
7d57b99756d8996	10	negative	0	0	0
e062569e41c63d2	0	negative	0	0	0	-1.43435	-1.27546	-0.366671	-0.438097	-0.761883	-0.645416	0.343725	-0.253229	-0.834685	-0.971801	-0.835508	-1.23588	2.30102	-0.18279		not_detected	not_detected	detected	not_detected	not_detected	not_detected		not_detected	not_detected	not_detected	not_detected	not_detected	not_detected	not_detected	not_detected	not_detected	not_detected	not_detected	0.167619		-0.471778				negative	negative
d682a0c1c2d4345	12	negative	0	0	0	-0.473031	-0.460932	-0.768649	-0.101517	-0.779514	-1.48979	-0.0545852	-0.498115	-0.529226	0.648619	-0.624811	0.767079	0.121178	-0.18279																				1.60991						negative	positive
871b1b02e9e9fe9	2	negative	0	0	0
9ac2b0ce16093f0	10	negative	0	0	0
f2f596c6115a977	11	negative	0	0	0																not_detected	not_detected	detected	not_detected	not_detected	not_detected		not_detected	not_detected	not_detected	not_detected	not_detected	not_detected	not_detected	not_detected	not_detected	not_detected	not_detected
b6cbe570e374f3e	14	negative	0	0	0	-0.198368	-0.210308	1.79396	-1.22345	-0.532689	-0.329842	-0.0545852	2.30694	-1.14014	0.596348	-0.414114	0.727019	-0.220244	-0.536617																					0.602592		-0.804794					-0.448998	-0.510579	-0.341839
613a4ce3bd30efe	15	negative	0	0	0																																								negative	negative
4d93420a1787068	16	negative	0	0	0
2050d2f66399f5e	9	negative	0	0	0
6c0a2664373bed8	1	negative	0	0	0																detected	not_detected	not_detected	not_detected	not_detected	not_detected		not_detected	not_detected	not_detected	not_detected	not_detected	not_detected	not_detected	not_detected	not_detected	not_detected	not_detected
11e5c1544e3f67d	19	negative	0	0	0
1dc4ac54b498e0b	19	negative	0	0	0
a5618b06090a7bb	17	negative	0	0	0
d1fc5e392a4ee78	19	negative	0	0	0
71528c4584c06f1	19	negative	0	0	0
c60461c5ecef650	11	negative	0	0	0	0.488289	0.29094	-0.127997	-0.999063	0.260678	1.43567	-0.652057	-0.503681	1.30353	-0.0309113	3.12559	0.306399	0.278757	0.790231		not_detected	not_detected	not_detected	not_detected	not_detected	detected		not_detected	not_detected	not_detected	not_detected	not_detected	not_detected	not_detected	not_detected	not_detected	not_detected	not_detected	-2.0286		-0.513505	0.74595	1.42434	-0.575008
aa763902bed31fe	1	negative	0	0	0
59ef8a86cb061cf	6	negative	0	0	0
cb3c92b03b42b59	9	negative	0	0	0																																								negative	negative
34bbee744d55e5d	2	negative	0	0	0	-1.43435	-1.08749	0.0981157	-1.22345	-0.56795	1.1201	1.23993	-0.921099	-1.14014	-0.971801	-0.414114	-1.63647	-0.482876	0.0825793																					-0.811643	-0.382362	-1.28725					-0.366304	-0.0460737	-0.409223
6944c3eb76a3fe8	19	negative	0	0	0
5c30f2f53f06d09	7	negative	0	0	0	1.58694	1.60672	-0.0526261	1.58138	2.02371	-0.150732	0.443306	0.0389638	-0.529226	-0.762714	-0.161278	-1.07564	-0.246507	-0.18279		not_detected	not_detected	not_detected	not_detected	not_detected	not_detected		not_detected	not_detected	not_detected	not_detected	not_detected	not_detected	not_detected	not_detected	not_detected	not_detected	not_detected	0.347905	0.602592	-0.515492	0.539184	0.93002	-0.215628			-0.256045	-0.1622
7e79221239f0a57	19	negative	0	0	0																not_detected	not_detected	not_detected	not_detected	not_detected	not_detected		not_detected	not_detected	not_detected	not_detected	not_detected	not_detected	not_detected	not_detected	not_detected	not_detected	not_detected
f0f9b057da6ae64	5	negative	0	0	0
ec9f087759dad1f	3	negative	0	0	0																not_detected	not_detected	not_detected	not_detected	not_detected	detected		not_detected	not_detected	not_detected	not_detected	not_detected	not_detected	not_detected	detected	not_detected	not_detected	not_detected
897450f3cde44e5	17	negative	0	0	0
57b75a141b49980	12	negative	0	0	0
2d70925d6b9b335	0	negative	0	0	0
cd9f6d33683cffe	1	negative	0	0	0
8d3a1953d315ce1	0	negative	0	0	0																																								negative	negative
6edc1d99c37af5d	1	negative	0	0	0	-0.221256	-0.147652	1.64322	-1.11126	0.190156	-0.500423	0.244149	2.06484	-1.14014	-0.658171	0.428674	-0.835285	-0.220244	-0.713529		not_detected	not_detected	not_detected	not_detected	not_detected	detected		not_detected	not_detected	not_detected	not_detected	not_detected	not_detected	not_detected	not_detected	not_detected	not_detected	not_detected			0.503845		-1.04727	-0.934388	negative	negative	-0.366304	-0.00736494	-0.409223
4f5daac6f910b55	9	negative	0	0	0
72ca7ed61c2a196	9	negative	0	0	0
2222bb6d5b90ddd	9	negative	0	0	0	-0.450142	-0.460932	-1.76103	2.70331	-0.56795	-0.773352	-0.154166	-0.589947	-0.223767	0.230447	-0.540532	0.326428	1.06665	-1.06736																				0.601946		-0.519466
0c93387fab5847e	14	negative	0	0	0
80c48955d9317a0	14	negative	0	0	0
22ee5f4c398f991	19	negative	0	0	0
2a90bc1b8fe5188	19	negative	0	0	0
01f71188ca3417c	10	negative	0	0	0
9308f511247143f	17	negative	0	0	0																not_detected	not_detected	not_detected	not_detected	not_detected	detected		not_detected	not_detected	not_detected	not_detected	not_detected	not_detected	not_detected	not_detected	not_detected	not_detected	not_detected
6eeb55f45d4118b	8	negative	0	0	0																not_detected	not_detected	not_detected	not_detected	not_detected	not_detected		not_detected	not_detected	not_detected	not_detected	not_detected	not_detected	not_detected	detected	not_detected	not_detected	not_detected
57d53002fe89540	10	negative	0	0	0
cb4ba758a9ee2d4	11	negative	0	0	0
20d73dd7eb09c90	7	negative	0	0	0
1b6f0243ab9f427	2	negative	0	0	0
2b262fba1633e3f	16	negative	0	0	0
ae31446ffdc8d3c	16	negative	0	0	0
8cd963818765b5a	17	negative	0	0	0
051386423aff1f8	17	negative	0	0	0
ed5c7655be41078	18	negative	0	0	0																not_detected	not_detected	not_detected	not_detected	not_detected	not_detected		not_detected	not_detected	not_detected	not_detected	not_detected	not_detected	not_detected	not_detected	not_detected	not_detected	not_detected
516736a6c7aec6b	13	negative	0	0	0	-0.106813	-0.0849959	1.44223	-0.438097	0.436981	0.0113201	0.0449914	1.0519	-1.14014	-0.971801	0.00727989	-1.1157	0.30502	-0.18279		not_detected	not_detected	not_detected	not_detected	not_detected	not_detected		not_detected	not_detected	not_detected	not_detected	not_detected	not_detected	not_detected	not_detected	not_detected	not_detected	not_detected		-0.662776	-0.304869	-0.0811133	1.42434	1.58127	negative	negative	-0.0630925	-0.394452
329dfd7b777f697	2	negative	0	0	0																not_detected	not_detected	not_detected	not_detected	not_detected	detected		not_detected	not_detected	not_detected	not_detected	not_detected	not_detected	not_detected	not_detected	not_detected	detected	not_detected
8489b99b9725fdb	0	negative	0	0	0
70f655648ded7ac	16	negative	0	0	0																not_detected	not_detected	not_detected	not_detected	not_detected	detected		not_detected	not_detected	not_detected	not_detected	not_detected	not_detected	not_detected	not_detected	not_detected	not_detected	not_detected
92bc16f16153b85	5	negative	0	0	0
c34a452bc3f3a2a	13	negative	0	0	0
5974bf5edada714	8	negative	0	0	0
96a9ce640298a86	14	negative	0	0	0
5674e2b36c128e1	13	negative	0	0	0
87b546d5f6c19a5	2	negative	0	0	0																																								negative	negative
2f4fad16db49bb8	13	negative	0	0	0																not_detected	not_detected	not_detected	not_detected	not_detected	detected		not_detected	not_detected	not_detected	not_detected	not_detected	not_detected	not_detected	not_detected	not_detected	not_detected	not_detected
4266ddd630da8b4	13	negative	0	0	0																																								negative	negative
92e8b492bebea90	1	negative	0	0	0																not_detected	not_detected	not_detected	not_detected	not_detected	detected		not_detected	not_detected	not_detected	not_detected	not_detected	not_detected	not_detected	not_detected	not_detected	not_detected	not_detected
57ad09c213332e1	2	negative	0	0	0																not_detected	not_detected	not_detected	not_detected	not_detected	not_detected		not_detected	not_detected	not_detected	not_detected	not_detected	not_detected	not_detected	not_detected	not_detected	not_detected	not_detected
ab9c2fdf264dfad	4	negative	0	0	0
1f84e82d0395814	19	negative	0	0	0
4951248003e9e86	13	negative	0	0	0	-1.04525	-1.15015	0.776453	-0.999063	-1.27316	0.497476	-0.751633	0.509256	2.52537	0.334989	2.9149	0.787108	-0.299034	-0.18279	-0.504062	not_detected	not_detected	not_detected	not_detected	not_detected	detected		not_detected	not_detected	not_detected	not_detected	not_detected	not_detected	not_detected	not_detected	not_detected	not_detected	not_detected	-0.938685	-0.737209		-0.32234	-1.29443	-0.215628
c69fc4a59903e2d	7	negative	0	0	0
bcf35d3d9261966	10	negative	0	0	0																not_detected	not_detected	not_detected	not_detected	not_detected	not_detected		not_detected	not_detected	not_detected	not_detected	not_detected	not_detected	not_detected	not_detected	not_detected	not_detected	not_detected							negative	negative
1e37302521d68cf	2	negative	0	0	0
50f0766d377b3d3	11	negative	0	0	0
08e04abcd2027c8	8	negative	0	0	0																not_detected	not_detected	not_detected	not_detected	not_detected	detected		not_detected	not_detected	not_detected	not_detected	not_detected	not_detected	not_detected	not_detected	not_detected	not_detected	not_detected
0568d34dd8bdd42	14	negative	0	0	0																not_detected	not_detected	not_detected	not_detected	not_detected	not_detected		not_detected	not_detected	not_detected	not_detected	not_detected	not_detected	not_detected	not_detected	not_detected	not_detected	not_detected
d929a81f95eafee	14	negative	0	0	0	-0.656139	-0.6489	-0.00237881	0.796029	-0.726622	0.45483	-0.154166	0.690137	0.99807	0.178175	2.83062	0.26634	-0.535402	0.613318		not_detected	not_detected	not_detected	not_detected	not_detected	not_detected		not_detected	not_detected	not_detected	not_detected	not_detected	not_detected	not_detected	not_detected	not_detected	not_detected	not_detected	-0.766594
0eec57dfced8d35	0	negative	0	0	0
c06c095396dea7d	1	negative	0	0	0
c2da86a8c9fbd24	13	negative	0	0	0																not_detected	not_detected	not_detected	not_detected	not_detected	not_detected		not_detected	not_detected	not_detected	not_detected	not_detected	not_detected	not_detected	detected	not_detected	not_detected	not_detected
c99cf8168c0c2df	4	negative	0	0	0	-0.907913	-0.774212	0.349352	0.683835	-1.20264	1.77683	0.343725	-0.49255	1.91445	0.962249	0.723649	0.907285	0.410073	-0.713529																				-1.94665		-0.521453
87f6213114aef37	11	negative	0	0	0																																								negative	negative
469b3501c3305b1	0	negative	0	0	0																																								negative	negative
bd91d0bf3a192a8	16	negative	0	0	0																not_detected	not_detected	not_detected	not_detected	not_detected	not_detected		not_detected	not_detected	not_detected	not_detected	not_detected	not_detected	not_detected	detected	not_detected	not_detected	not_detected							negative	negative
47817e1d6f9e088	8	negative	0	0	0	0.991838	1.04281	0.311666	0.459449	1.37139	1.67448	0.443306	0.0556604	1.60899	-0.658171	-0.119138	-0.915404	-0.482876	0.259492	-0.837191																			-1.3976	0.602592	-0.493635	0.263496	-0.305787	1.58127	negative	negative
77208f98846bf51	7	negative	0	0	0																																								negative	negative
326882deff30e42	14	negative	0	0	0																																								negative	positive
56a0f9b46a19640	1	negative	0	0	0																																								negative	negative
c49db20ce33a59a	14	negative	0	0	0																																								negative	negative
597c226708efc55	18	negative	0	0	0
6cb205558050854	0	negative	0	0	0
9a46f3a8a9af5a6	7	negative	0	0	0
749c510e7648661	4	negative	0	0	0																not_detected	not_detected	not_detected	not_detected	detected	detected		not_detected	not_detected	not_detected	not_detected	not_detected	not_detected	not_detected	not_detected	not_detected	not_detected	not_detected
e85479368721859	19	negative	0	0	0
c1aa8e028e2141a	15	negative	0	0	0
7c38075e5921dca	11	negative	0	0	0
ddbb6975a6e81bc	9	negative	0	0	0
5c50590b1103c00	1	negative	0	0	1	-0.129702	-0.147652	0.600588	-1.44784	0.701437	-0.70512	-0.0545852	-0.503681	0.387152	-1.49452	0.386534	-1.61644	-1.61219	-0.625073		not_detected	not_detected	not_detected	not_detected	not_detected	not_detected		not_detected	not_detected	not_detected	not_detected	not_detected	not_detected	not_detected	detected	not_detected	not_detected	not_detected	1.17559	-0.737209	-0.459856	-1.90755		0.143752
781db46c2025ff0	12	negative	0	0	0																not_detected	not_detected	detected	not_detected	not_detected	not_detected		not_detected	not_detected	not_detected	not_detected	not_detected	not_detected	not_detected	not_detected	not_detected	not_detected	not_detected
c5f1d753a539b1c	1	negative	0	0	0																not_detected	not_detected	not_detected	not_detected	not_detected	not_detected		not_detected	not_detected	not_detected	not_detected	not_detected	not_detected	not_detected	not_detected	not_detected	not_detected	not_detected
532153d66b0b768	0	negative	0	0	0																not_detected	not_detected	not_detected	not_detected	not_detected	not_detected		not_detected	not_detected	not_detected	not_detected	not_detected	not_detected	not_detected	not_detected	not_detected	not_detected	not_detected
1a93284a156481c	1	negative	0	0	0																not_detected	not_detected	not_detected	not_detected	not_detected	detected		not_detected	not_detected	not_detected	not_detected	not_detected	not_detected	not_detected	not_detected	not_detected	not_detected	not_detected
2abd63295022e08	18	negative	0	0	0
b633692ff9c7d2b	6	negative	0	0	0																not_detected	not_detected	detected	not_detected	not_detected	not_detected		not_detected	not_detected	not_detected	not_detected	not_detected	not_detected	not_detected	not_detected	not_detected	not_detected	not_detected							positive	negative
44a4cb6c07b50c9	15	negative	0	0	0																not_detected	not_detected	not_detected	detected	not_detected	not_detected		not_detected	not_detected	not_detected	not_detected	not_detected	not_detected	not_detected	not_detected	not_detected	not_detected	not_detected
747bec6a74eced6	6	negative	0	0	0																not_detected	not_detected	not_detected	not_detected	not_detected	detected		not_detected	not_detected	not_detected	not_detected	not_detected	not_detected	not_detected	not_detected	not_detected	not_detected	not_detected
42060192b0a4109	1	negative	0	0	0																																								negative	negative
d75273e980dd15a	9	negative	0	0	0
894d6c07fcbd226	13	negative	0	0	0	1.22072	0.729532	0.826701	0.0106766	1.15983	-1.52391	-1.44868	3.77904	-1.14014	-0.814985	-0.835508	-0.174311	-0.220244	0.524862		not_detected	not_detected	not_detected	not_detected	not_detected	detected		not_detected	not_detected	not_detected	not_detected	not_detected	not_detected	not_detected	not_detected	not_detected	not_detected	not_detected			-0.416142	-0.598028
59cd7a11b6cb0e9	14	negative	0	0	0																not_detected	not_detected	not_detected	not_detected	not_detected	not_detected		not_detected	not_detected	not_detected	not_detected	not_detected	not_detected	not_detected	not_detected	not_detected	not_detected	not_detected
39648df4a3acde6	16	negative	0	0	0																not_detected	detected	not_detected	not_detected	not_detected	not_detected		not_detected	not_detected	not_detected	not_detected	not_detected	not_detected	not_detected	not_detected	not_detected	not_detected	not_detected							negative	negative
dcdcb7aad96a591	16	negative	0	0	0
d9ad0a5f8ec0d4b	9	negative	0	0	0																not_detected	not_detected	not_detected	not_detected	not_detected	not_detected		not_detected	not_detected	not_detected	not_detected	not_detected	not_detected	not_detected	not_detected	not_detected	not_detected	not_detected							negative	negative
a33a8a698bc8577	13	negative	0	0	0																not_detected	not_detected	detected	not_detected	not_detected	not_detected		not_detected	not_detected	not_detected	not_detected	not_detected	not_detected	not_detected	not_detected	not_detected	not_detected	not_detected							negative	negative
1b9eda5d065310f	11	negative	0	0	0	0.534067	0.29094	-0.328986	-0.662483	0.683806	-0.329842	-0.751633	0.0667916	0.387152	-0.762714	0.807928	-0.454724	-0.27277	0.701775	-0.443493	not_detected	not_detected	not_detected	not_detected	not_detected	detected		not_detected	not_detected	not_detected	not_detected	not_detected	not_detected	not_detected	not_detected	not_detected	not_detected	not_detected	0.315126	-0.141742	-0.493635	-0.253418	-0.0586259	0.143752
2da9801abb49678	18	negative	1	0	0	0.488289	0.228284	0.0855539	-0.774677	0.754327	2.02417	-0.85121	-0.69291	0.0816925	-0.971801	0.00727989	-0.655019	-0.27277	0.347948		not_detected	not_detected	not_detected	not_detected	not_detected	not_detected		not_detected	not_detected	not_detected	not_detected	not_detected	not_detected	not_detected	detected	not_detected	not_detected	not_detected	-1.78275	-0.290609	-0.382362	-0.735872	-0.80011	1.22189
ab9745da9d139b9	15	positive	1	0	0	-0.495919	-0.398276	-0.718402	-0.438097	-0.56795	-0.935404	0.244149	-0.820919	-1.14014	0.334989	-0.66695	0.22628	-0.456613	-0.978899	-0.928044	not_detected	not_detected	not_detected	not_detected	not_detected	not_detected		not_detected	not_detected	not_detected	not_detected	not_detected	not_detected	not_detected	not_detected	not_detected	not_detected	not_detected	1.28212	0.974759	-0.247246	0.160114	-1.04727	0.862512
33a9bddaaeb5992	19	negative	0	0	0	1.88449	1.73203	-0.70584	1.91796	1.40665	-0.184848	-0.0545852	-0.361758	0.692611	0.334989	1.86141	0.426576	0.804021	-0.271247		not_detected	not_detected	not_detected	not_detected	detected	not_detected		not_detected	not_detected	not_detected	not_detected	not_detected	not_detected	not_detected	not_detected	not_detected	not_detected	not_detected	-0.373241		0.0448452
57f9490562be29d	1	negative	0	0	0																not_detected	not_detected	not_detected	not_detected	not_detected	detected		not_detected	not_detected	not_detected	not_detected	not_detected	not_detected	not_detected	not_detected	not_detected	not_detected	not_detected
a4b6a7fd0a9723d	2	negative	0	0	0																not_detected	not_detected	not_detected	not_detected	not_detected	not_detected		not_detected	not_detected	not_detected	not_detected	not_detected	not_detected	not_detected	not_detected	not_detected	not_detected	not_detected
b1a9e2210c0508f	14	negative	0	0	0
02ff56fe934f3b0	17	negative	0	0	0	0.671398	0.541564	-0.354109	-0.886869	0.207786	-0.133674	-0.353319	-0.200356	0.692611	0.491805	0.934346	0.74705	0.882811	-0.271247		not_detected	not_detected	not_detected	not_detected	not_detected	detected		not_detected	not_detected	not_detected	not_detected	not_detected	not_detected	not_detected	not_detected	not_detected	not_detected	not_detected	-0.266708	-0.365042		-0.977099	1.17718	1.22189	negative	negative	-0.504127	-0.549287
794640fc2acbcf3	11	negative	0	0	0	-0.381476	-0.0849959	-0.328986	0.908221	-0.673732	1.24803	1.14035	-0.281057	1.60899	1.17134	2.83062	0.70699	-0.325297	-0.271247	-0.352639	not_detected	not_detected	not_detected	not_detected	not_detected	not_detected		not_detected	not_detected	not_detected	not_detected	not_detected	not_detected	not_detected	not_detected	not_detected	not_detected	not_detected	-1.61066	0.453725	-0.485687	0.608106	-0.80011	1.22189			0.102296	-0.0847824	-0.319378
fcb604a2255f523	0	negative	0	0	0																not_detected	not_detected	not_detected	not_detected	not_detected	not_detected		not_detected	not_detected	not_detected	not_detected	not_detected	not_detected	not_detected	not_detected	not_detected	not_detected	not_detected
eb7c4386adbf972	1	negative	0	0	0
c3e0ea40faedf95	18	negative	0	0	0
650995eb271ec1d	0	negative	0	0	0
6d0410bcd9c9fd2	11	negative	0	0	0	-0.15259	0.416252	-0.21593	1.69357	0.87774	1.78536	2.23571	-0.553771	1.91445	-0.867257	0.217977	-1.95694	0.725232	0.0825793		not_detected	not_detected	not_detected	not_detected	not_detected	not_detected		not_detected	not_detected	not_detected	not_detected	not_detected	not_detected	not_detected	not_detected	not_detected	not_detected	not_detected	-1.95485		-0.4837
88f236063e8f6e8	19	negative	0	0	0
4c7e1a63f439e0b	17	negative	0	0	0
409a20db2f52139	1	negative	0	0	0																																								negative	positive
461c887526c8fc5	1	negative	0	0	0																not_detected	not_detected	not_detected	not_detected	not_detected	detected		not_detected	not_detected	not_detected	not_detected	not_detected	not_detected	not_detected	detected	not_detected	not_detected	not_detected
125a50bd95868d5	14	negative	0	0	0																not_detected	not_detected	not_detected	not_detected	not_detected	not_detected		not_detected	not_detected	not_detected	not_detected	not_detected	not_detected	not_detected	not_detected	not_detected	not_detected	not_detected
244ae151eeb4a41	15	negative	0	0	0																not_detected	not_detected	not_detected	not_detected	not_detected	not_detected		not_detected	not_detected	not_detected	not_detected	not_detected	not_detected	not_detected	not_detected	not_detected	not_detected	not_detected
540015e4341f7dc	15	negative	0	0	0
738ba8112eaca05	17	negative	0	0	0																not_detected	not_detected	not_detected	not_detected	not_detected	detected		not_detected	not_detected	not_detected	not_detected	not_detected	not_detected	not_detected	not_detected	not_detected	not_detected	not_detected
0a3f7909438e78b	1	negative	0	0	0
a9ed3a0c139b8e2	13	negative	0	0	0																not_detected	not_detected	not_detected	not_detected	not_detected	not_detected		not_detected	not_detected	not_detected	not_detected	not_detected	not_detected	not_detected	not_detected	not_detected	not_detected	not_detected
f19a626b527202d	12	negative	0	0	0
69b5769b6b6713d	18	negative	0	0	0																not_detected	not_detected	not_detected	not_detected	not_detected	detected		not_detected	not_detected	not_detected	not_detected	not_detected	not_detected	not_detected	not_detected	not_detected	not_detected	not_detected
c3dea693d978474	2	negative	0	0	0	-1.27413	-0.96218	-1.28368	0.235063	-0.321124	0.207488	1.04077	-0.61221	-1.14014	-1.18089	-0.414114	-1.81673	-1.00814	-0.44816																						0.154131				negative	negative
b2366c90eec2924	2	negative	0	0	0	-0.473031	-0.0849959	1.20355	-0.55029	0.507502	1.06039	1.53866	-0.486984	0.692611	-1.07634	1.18718	-1.87682	-0.0626645	-0.978899																				-1.19273		-0.527414				negative	negative
4f295d01be7c6ec	17	negative	0	0	0
8018f1e0f2da1b8	16	negative	0	0	0																																								negative	negative
9ab7609b716cb2e	13	negative	0	0	0	0.556955	0.792188	-1.33393	0.0106766	0.119635	-1.69449	1.04077	-0.470287	-1.14014	1.11906	-0.835508	0.727019	-0.482876	-0.978899																						0.243546				negative	negative
c96a77c8b761083	7	negative	0	0	0	-0.907913	-1.33812	-1.33393	0.908221	-1.53762	0.898341	-2.04615	-1.28286	-0.223767	0.544077	-0.70909	1.80862	1.09292	0.0825793	-0.352639	not_detected	not_detected	not_detected	not_detected	not_detected	not_detected		not_detected	not_detected	not_detected	not_detected	not_detected	not_detected	not_detected	detected	not_detected	not_detected	not_detected	-0.979659	-0.96051	-0.120077	-0.391262	-1.54159	0.143752
4fa43a028913d1b	11	negative	0	0	0																not_detected	not_detected	detected	not_detected	not_detected	not_detected		not_detected	not_detected	not_detected	not_detected	not_detected	not_detected	not_detected	not_detected	not_detected	not_detected	not_detected
72eb26d2d535794	16	negative	0	0	0	0.0762952	0.541564	-1.17063	0.796029	0.172526	-1.43009	1.8374	0.731879	-0.834685	0.596348	-0.66695	-0.274459	0.0949146	-0.625073		not_detected	not_detected	not_detected	not_detected	not_detected	not_detected		not_detected	not_detected	not_detected	not_detected	not_detected	not_detected	not_detected	not_detected	not_detected	not_detected	not_detected	1.57713	-0.588343	0.952909	0.297958	0.682859	-1.29377	negative	negative	-0.28361	-0.549287	-0.251993
ca09843f76c30d5	13	negative	0	0	0
05fde8d787f1794	2	negative	0	0	0																not_detected	not_detected	not_detected	not_detected	not_detected	not_detected		not_detected	not_detected	not_detected	not_detected	not_detected	not_detected	not_detected	detected	not_detected	not_detected	not_detected							negative	positive
82ca89fc1fe6797	11	negative	0	0	0																not_detected	not_detected	not_detected	not_detected	not_detected	detected		not_detected	not_detected	not_detected	not_detected	not_detected	not_detected	not_detected	not_detected	not_detected	not_detected	not_detected
9aeb01d4dd77cf5	9	negative	0	0	0																not_detected	not_detected	not_detected	not_detected	not_detected	detected		not_detected	not_detected	not_detected	not_detected	not_detected	not_detected	not_detected	not_detected	not_detected	not_detected	not_detected							negative	negative
f3ef249ea3587de	15	negative	0	0	0
6bcc491f2043e3e	11	negative	0	0	0
3c64e94b6987bbd	5	negative	0	0	0																not_detected	not_detected	not_detected	not_detected	not_detected	detected		not_detected	not_detected	not_detected	not_detected	not_detected	not_detected	not_detected	not_detected	not_detected	not_detected	not_detected
93c09bcebae8caa	18	negative	0	0	0
0cd64c191b3ff10	11	negative	0	0	0
0e760b3f10949a1	16	negative	0	0	0	-0.564585	-0.460932	-0.00237881	-1.89661	-0.656101	-0.577184	0.343725	-0.748566	0.0816925	0.387261	1.94569	0.286369	-0.141454	-0.18279																				0.298736		-0.501583				negative	negative
bebd68f3afe97e7	1	negative	0	0	0																																								negative	positive
7333a21630468b5	6	negative	0	0	0
dad2eecc9a0bf16	19	negative	0	1	0	-0.358588	-0.147652	-0.21593	-0.55029	-0.902926	-0.406603	0.74204	0.701268	0.0816925	1.53724	0.597231	1.30788	-0.115191	-0.359703		not_detected	not_detected	not_detected	not_detected	not_detected	detected		not_detected	not_detected	not_detected	not_detected	not_detected	not_detected	not_detected	not_detected	not_detected	not_detected	not_detected	0.388879	-0.0673088	1.34435	0.0567305	1.42434	-0.934388
b676445c47d9401	18	negative	0	0	0																not_detected	not_detected	not_detected	not_detected	not_detected	not_detected		not_detected	not_detected	not_detected	not_detected	not_detected	not_detected	not_detected	not_detected	not_detected	not_detected	not_detected
419481cd8d66684	2	negative	0	0	0
534c749a60539ab	17	negative	0	0	0	1.38094	1.10547	0.412161	0.908221	1.07167	-1.27657	-0.652057	-0.04452	0.0816925	-0.0831831	-0.203417	0.246311	0.278757	0.0825793		not_detected	not_detected	not_detected	not_detected	not_detected	not_detected		not_detected	not_detected	not_detected	not_detected	not_detected	not_detected	not_detected	not_detected	not_detected	not_detected	not_detected	1.25753		0.515767
f34318e102f15c7	13	negative	0	0	0	0.282293	-0.147652	-0.241053	1.80577	-0.779514	0.437772	-1.54826	1.1159	-0.529226	1.27588	-0.161278	2.30935	-0.745508	-1.06736																				-0.0618367		-0.447934				negative	negative
6c2cbcc8fc6de3f	3	negative	0	0	0	-0.495919	-0.523588	0.19861	0.459449	-0.462168	0.0539653	-0.253742	1.19382	-0.529226	-0.135455	-0.70909	-0.0140739	-0.220244	-0.271247	-0.231502																			0.249567	-1.03494	-0.362492	-0.735872	-1.78876	0.503132
8707b476a6bd4dd	1	negative	0	0	0
fe348528e261929	13	negative	0	0	0
75d5fd7dad59f05	8	negative	0	0	0																not_detected	not_detected	not_detected	not_detected	not_detected	not_detected		not_detected	not_detected	not_detected	not_detected	not_detected	not_detected	not_detected	not_detected	not_detected	not_detected	not_detected
bb273762b91a277	0	negative	0	0	0																																								negative	negative
944368db7c82019	4	negative	0	0	0	0.488289	0.353596	-0.391795	1.13261	0.683806	0.497476	-0.353319	-0.411849	-0.223767	-0.658171	-0.624811	-0.534842	-0.640455	-1.15581		not_detected	not_detected	not_detected	not_detected	not_detected	not_detected		not_detected	not_detected	not_detected	not_detected	not_detected	not_detected	not_detected	not_detected	not_detected	not_detected	not_detected	-0.0700317		-0.519466
df8832132ffd75d	11	negative	0	0	0	1.40383	1.41875	-0.56766	0.571643	1.65348	-1.22539	0.343725	0.108534	-0.529226	-0.501356	-0.498393	-0.755167	1.14544	-0.0058775		not_detected	not_detected	not_detected	not_detected	not_detected	not_detected		detected	not_detected	not_detected	not_detected	not_detected	not_detected	not_detected	detected	not_detected	not_detected	not_detected	1.01169		-0.00284307
c40c266ff86dd05	11	negative	0	0	0
567c74999dbf576	9	negative	0	0	0																not_detected	not_detected	not_detected	not_detected	not_detected	detected		not_detected	not_detected	not_detected	not_detected	not_detected	not_detected	not_detected	detected	not_detected	not_detected	not_detected							negative	negative
0cd8fd5c5bc3c52	9	negative	0	0	0	0.419624	0.165628	1.64322	-0.662483	0.754327	1.06039	-0.85121	-0.0695652	-0.223767	-1.07634	-0.624811	-0.775198	-0.876824	0.436405																				-0.537138	-1.03494		-0.770333	-0.0586259	0.862512			-0.366304	-0.510579	-0.251993
65f8331bccab88d	17	negative	0	0	0
830baaaf90f6976	2	negative	0	0	0
9cc9c51ef1d7908	2	negative	0	0	0																not_detected	not_detected	not_detected	not_detected	not_detected	not_detected		not_detected	not_detected	not_detected	not_detected	not_detected	not_detected	not_detected	not_detected	not_detected	not_detected	not_detected
1ae29b0487ace4b	3	negative	0	0	0
8f4ad8405e9cb11	1	negative	0	0	0
3ede3cb64869011	0	negative	0	0	0
c6b60872310d3fe	2	negative	0	0	0																not_detected	not_detected	not_detected	not_detected	not_detected	not_detected		not_detected	not_detected	not_detected	not_detected	not_detected	not_detected	not_detected	not_detected	not_detected	not_detected	not_detected
c4bd45e9d39cffe	2	negative	0	0	0
da7840fd6ccb5b6	17	negative	0	0	0
aad55037bcfca92	11	negative	0	0	0	0.946061	0.980156	-0.0400642	0.683835	0.983522	-0.022796	0.343725	0.704051	-0.529226	-0.135455	-0.203417	-0.314517	-0.0364015	0.171035																				0.167619	0.00712461		-0.218957	0.188535	0.862512			0.433072	-0.239617	-0.0835329
2d7c2fd1e1c02b7	2	negative	0	0	0																not_detected	not_detected	not_detected	not_detected	not_detected	not_detected		not_detected	not_detected	not_detected	not_detected	not_detected	not_detected	not_detected	not_detected	not_detected	not_detected	not_detected
8828bca54c32b12	17	negative	0	0	0																not_detected	not_detected	not_detected	not_detected	not_detected	not_detected		not_detected	not_detected	not_detected	not_detected	not_detected	detected	not_detected	not_detected	not_detected	not_detected	not_detected
3abbe373bc01b4c	18	negative	0	0	0																not_detected	not_detected	not_detected	not_detected	not_detected	not_detected		not_detected	not_detected	not_detected	not_detected	not_detected	not_detected	not_detected	not_detected	not_detected	not_detected	not_detected
97bfe3b7e67b374	1	negative	0	0	0
faa071bb0ce61ae	6	negative	0	0	0																not_detected	not_detected	not_detected	not_detected	not_detected	not_detected		not_detected	not_detected	not_detected	not_detected	not_detected	not_detected	not_detected	detected	not_detected	not_detected	not_detected
d1142b601e7adc1	1	negative	0	0	0																																								positive	negative
be831ba1a5d482c	8	negative	0	0	0
b7ca29b16087d20	14	negative	0	0	0																not_detected	not_detected	not_detected	not_detected	not_detected	not_detected		not_detected	not_detected	not_detected	not_detected	not_detected	detected	not_detected	not_detected	not_detected	not_detected	not_detected
81a70c1476c9ccb	8	negative	0	0	0
409e2bb48525463	6	negative	0	0	0																not_detected	not_detected	not_detected	not_detected	not_detected	not_detected		detected	not_detected	not_detected	not_detected	not_detected	not_detected	not_detected	not_detected	not_detected	not_detected	not_detected
06df3f8615efab5	2	negative	0	0	0
f2d6ab83db0f769	13	negative	0	0	0	-0.541696	-0.6489	0.851824	-0.101517	-0.691362	0.292779	-0.552476	0.670657	0.0816925	0.125903	-0.329835	0.426576	-0.587929	-0.359703																				0.0446962		-0.521453
4f6e2f874bfb80b	8	negative	0	0	0
3f25f5cf63f16e0	6	negative	0	0	0
7f7bfdd98f5822b	14	negative	0	0	0
5cb6aae566d23be	7	negative	0	0	0
cd43c3da3396698	2	negative	0	0	0
72087476f67f65c	2	negative	0	0	0
f0dc9585b720583	2	negative	0	0	0
a5ab868b95d8be6	19	negative	0	0	0
808cc838f7991f9	2	negative	0	0	0																not_detected	not_detected	not_detected	not_detected	not_detected	not_detected		not_detected	not_detected	not_detected	not_detected	not_detected	not_detected	not_detected	not_detected	not_detected	not_detected	not_detected							negative	negative
0ee656553ceacd6	2	negative	0	0	0																not_detected	not_detected	not_detected	not_detected	not_detected	not_detected		not_detected	not_detected	not_detected	not_detected	not_detected	not_detected	not_detected	not_detected	not_detected	not_detected	not_detected							negative	negative
344d8b568b75328	5	negative	0	0	0																not_detected	not_detected	not_detected	not_detected	not_detected	detected		not_detected	not_detected	not_detected	not_detected	not_detected	not_detected	not_detected	not_detected	not_detected	not_detected	not_detected
677126b092c18f2	2	negative	0	0	0																not_detected	not_detected	not_detected	not_detected	not_detected	not_detected		not_detected	not_detected	not_detected	not_detected	not_detected	not_detected	not_detected	detected	not_detected	not_detected	not_detected
c36fa22d08707de	11	negative	0	0	0																not_detected	not_detected	not_detected	not_detected	not_detected	not_detected		not_detected	not_detected	not_detected	not_detected	not_detected	not_detected	not_detected	not_detected	not_detected	not_detected	not_detected							negative	negative
6d4a0d4daf47cf7	3	negative	0	0	0
6ed5a0461b79ef5	0	negative	1	0	0																not_detected	not_detected	not_detected	not_detected	not_detected	detected		not_detected	not_detected	not_detected	not_detected	not_detected	not_detected	not_detected	not_detected	not_detected	not_detected	not_detected
cbacea5084b5a38	1	negative	0	0	0
e4d1c029f5357c2	11	negative	0	0	0																not_detected	not_detected	not_detected	not_detected	not_detected	detected		not_detected	not_detected	not_detected	not_detected	not_detected	not_detected	not_detected	not_detected	not_detected	not_detected	not_detected
28b8506cc147b0c	3	negative	0	0	0																not_detected	not_detected	not_detected	not_detected	not_detected	not_detected		not_detected	not_detected	not_detected	not_detected	not_detected	not_detected	not_detected	not_detected	not_detected	not_detected	not_detected
90a6c1fb3a4d835	8	negative	0	0	0																not_detected	not_detected	not_detected	not_detected	not_detected	not_detected		not_detected	not_detected	not_detected	not_detected	not_detected	not_detected	not_detected	not_detected	not_detected	not_detected	not_detected
b06988239ea463e	12	negative	0	0	0
4f928169ece8bda	15	negative	0	0	0
8a83433daf52a4f	0	negative	0	0	0																																								negative	negative
7fcd2d1c2a30558	1	negative	0	0	0																																								negative	positive
61415a108725d18	16	negative	0	0	0
0f018e43b2b7bcc	18	negative	0	0	0																not_detected	not_detected	not_detected	not_detected	not_detected	not_detected		not_detected	not_detected	not_detected	not_detected	not_detected	not_detected	not_detected	not_detected	not_detected	not_detected	not_detected							negative	negative
add4847766cf400	13	negative	1	0	0	1.63272	1.41875	0.688521	-0.55029	1.15983	-0.722178	-0.353319	1.88396	-0.223767	0.282719	0.0915587	0.486665	-0.377823	-0.536617	-0.352639	not_detected	not_detected	not_detected	not_detected	detected	not_detected		not_detected	not_detected	not_detected	not_detected	not_detected	not_detected	not_detected	not_detected	not_detected	not_detected	not_detected	0.88057	0.528158	-0.209492	1.43517	-0.305787	1.22189
2655cfe96b5153e	6	negative	0	0	0	1.31228	1.73203	0.261419	-1.67222	1.38902	0.36954	1.73782	-0.559337	2.52537	0.387261	4.22122	-0.434694	-0.482876	-0.713529	0.192481																			-1.01244			0.539184	-0.0586259	0.143752
ce16b39cba3cdb0	5	negative	0	0	0
840b7b670d2353a	15	negative	0	0	0																not_detected	not_detected	not_detected	not_detected	not_detected	not_detected		not_detected	not_detected	not_detected	not_detected	not_detected	not_detected	not_detected	detected	not_detected	not_detected	not_detected
322f60c4e39b93e	18	negative	0	0	0
4e31d52e564f767	16	negative	0	0	0
c2bd5315b9372ad	0	negative	0	0	0																																								positive	negative
55b6e33656f3a34	4	negative	0	0	0
8cf0b21c1a4dc45	3	negative	0	0	0																																								positive	negative
9a9b7f8f7a8efbb	2	negative	0	0	0																not_detected	not_detected	detected	not_detected	not_detected	not_detected		not_detected	not_detected	not_detected	not_detected	not_detected	not_detected	not_detected	not_detected	not_detected	not_detected	not_detected
c68db8633b53eab	0	negative	0	0	0
a863e6875d91f53	18	negative	0	0	0
52c398be6b98668	1	negative	0	0	0																not_detected	not_detected	not_detected	not_detected	not_detected	not_detected		not_detected	not_detected	not_detected	not_detected	not_detected	not_detected	not_detected	detected	not_detected	not_detected	not_detected							negative	positive
4ea714467679073	16	negative	0	0	0
c3d10a6d4706f8e	6	negative	0	0	0																not_detected	not_detected	not_detected	not_detected	not_detected	not_detected		not_detected	not_detected	not_detected	not_detected	not_detected	not_detected	not_detected	not_detected	not_detected	not_detected	not_detected
9c0a4a608a8ce70	14	negative	0	0	0																not_detected	not_detected	not_detected	not_detected	not_detected	not_detected		not_detected	not_detected	not_detected	not_detected	not_detected	not_detected	not_detected	not_detected	not_detected	not_detected	not_detected
c3b9750788386c1	5	negative	0	0	0
478d3070b75f2f7	1	negative	0	0	0																not_detected	not_detected	not_detected	not_detected	not_detected	detected		not_detected	not_detected	not_detected	not_detected	not_detected	not_detected	not_detected	not_detected	not_detected	not_detected	not_detected
0fcae6eedcd0f03	7	negative	0	0	0																not_detected	not_detected	not_detected	not_detected	not_detected	not_detected		not_detected	not_detected	not_detected	not_detected	not_detected	not_detected	not_detected	not_detected	not_detected	not_detected	not_detected
af9018a941dcd9f	15	negative	0	0	0																																								negative	negative
0304c7ed5c58c87	0	negative	0	0	0																																								negative	negative
a0435dd40e745fd	7	positive	0	0	0
5a108322b47d43e	17	negative	0	0	0
3bf4aac7477abb3	7	negative	0	0	0																not_detected	not_detected	not_detected	not_detected	not_detected	not_detected		not_detected	not_detected	not_detected	not_detected	not_detected	not_detected	not_detected	not_detected	not_detected	not_detected	not_detected
e572c89d8f01347	17	negative	0	0	0
7bad083d669a89f	10	negative	0	0	0																not_detected	not_detected	not_detected	not_detected	not_detected	not_detected		not_detected	not_detected	not_detected	not_detected	not_detected	not_detected	not_detected	not_detected	not_detected	not_detected	not_detected							negative	negative
bb2a954af50b295	6	negative	0	0	0
58124233669278b	3	negative	0	0	0
3acd26941a8592c	0	negative	0	0	0
1,52593E+14	5	negative	0	0	0																																								negative	negative
6da984da2a8e201	6	negative	0	0	0
678b7c9197e91e3	0	negative	0	0	0																not_detected	not_detected	not_detected	not_detected	not_detected	not_detected		not_detected	not_detected	not_detected	not_detected	not_detected	not_detected	not_detected	not_detected	not_detected	not_detected	not_detected							negative	negative
5f4f13d3b81f83e	0	negative	0	0	0																not_detected	not_detected	not_detected	not_detected	not_detected	detected		not_detected	not_detected	not_detected	not_detected	not_detected	not_detected	not_detected	not_detected	not_detected	not_detected	not_detected							negative	negative
f8d167f6a51ccaa	16	negative	0	0	0
a9cb54bd436c7fd	13	negative	0	0	0																not_detected	not_detected	not_detected	not_detected	not_detected	detected		not_detected	not_detected	not_detected	not_detected	not_detected	not_detected	not_detected	not_detected	not_detected	not_detected	not_detected
8cd175419bcce74	7	negative	0	0	0																																								negative	negative
0f098d2bd8d4bb1	1	negative	0	0	0																not_detected	not_detected	not_detected	not_detected	not_detected	not_detected		not_detected	not_detected	not_detected	not_detected	not_detected	not_detected	not_detected	detected	not_detected	not_detected	not_detected
e64b89d80b931a7	11	negative	0	0	0	0.328069	0.102972	-0.969638	0.122869	0.0843743	-1.42156	-0.751633	0.102968	-0.834685	-0.0309113	-0.793368	0.366488	-0.0364015	0.171035	-0.352639	not_detected	not_detected	not_detected	not_detected	not_detected	not_detected		not_detected	not_detected	not_detected	not_detected	not_detected	not_detected	not_detected	not_detected	not_detected	not_detected	not_detected	1.6345	-0.141742	0.402507	0.470262	-0.552949	0.143752	negative	negative
a95242f9c0a6817	6	negative	0	0	0																not_detected	not_detected	not_detected	not_detected	not_detected	not_detected		not_detected	not_detected	not_detected	not_detected	not_detected	not_detected	not_detected	not_detected	not_detected	not_detected	not_detected
e7368ed0bc2456b	9	negative	0	0	0																not_detected	not_detected	not_detected	not_detected	not_detected	not_detected		not_detected	not_detected	not_detected	not_detected	not_detected	not_detected	not_detected	not_detected	not_detected	not_detected	not_detected
7227aa80f1de069	9	negative	0	0	0																not_detected	not_detected	not_detected	not_detected	not_detected	not_detected		not_detected	not_detected	not_detected	not_detected	not_detected	not_detected	not_detected	not_detected	not_detected	not_detected	not_detected
f83c9dd74db258e	18	negative	0	0	0																not_detected	not_detected	not_detected	not_detected	not_detected	not_detected		not_detected	not_detected	not_detected	not_detected	not_detected	not_detected	not_detected	not_detected	not_detected	not_detected	not_detected
15a67bf328ff050	6	negative	0	0	0
7a47dd7801fc6e0	2	negative	0	0	0																																								negative	negative
a0efb1d105dd2e2	2	negative	0	0	0																																								negative	negative
1d16d9a388c0a82	8	negative	0	0	0
9d014dbead7ca25	2	negative	0	0	0
a8afe1ad34aa115	2	negative	0	0	0
c26212f828948a6	12	negative	0	0	0																not_detected	not_detected	not_detected	not_detected	not_detected	not_detected		not_detected	not_detected	not_detected	not_detected	not_detected	not_detected	not_detected	not_detected	not_detected	not_detected	not_detected
b64bc1acd95fd62	19	negative	0	1	0	0.556955	0.478908	2.18338	-0.213711	0.41935	-1.66037	-0.154166	2.94976	-0.834685	0.0213606	-0.793368	0.106103	-0.535402	0.878687	0.828455	not_detected	not_detected	not_detected	not_detected	not_detected	not_detected		not_detected	not_detected	not_detected	not_detected	not_detected	not_detected	not_detected	not_detected	not_detected	not_detected	not_detected	2.01965	0.602592	5.49919	-0.66695	-0.552949	-1.29377	negative	negative	-0.28361	-0.394452	-0.150917
17818a325546033	19	negative	0	0	0
127a4f95f9ca2e6	2	negative	0	0	0																																								positive	negative
372859f8e298ce9	8	negative	0	0	0																not_detected	not_detected	not_detected	not_detected	not_detected	not_detected		not_detected	not_detected	not_detected	not_detected	not_detected	not_detected	not_detected	not_detected	not_detected	not_detected	not_detected
2d77c8eee157184	6	negative	0	0	0
3332484c99e9277	12	negative	0	0	0
b4cb27832e02fe8	14	negative	0	0	0
66ee54712e5fbbb	10	negative	0	0	0
915911914fafb32	6	negative	0	0	0
31411b2b282d224	18	negative	0	0	0
74f11ac75908872	2	negative	0	0	0																																								negative	negative
c7f3716baac8239	9	negative	0	0	0
92f25cc7b91ea18	9	negative	0	0	0	-0.335699	-0.33562	-0.56766	-0.438097	-0.285863	1.11157	-0.0545852	-0.793091	0.692611	-0.0831831	-0.751229	-0.0741632	0.541389	-0.713529																				-1.02883		-0.326726				negative	negative
f1d13e54aeefcdc	3	negative	0	0	0
4439f550d1c07a1	17	negative	0	0	0
f0a2fcf866695a5	15	negative	0	0	0	0.16785	0.478908	-0.127997	-1.22345	0.648545	-0.909817	1.23993	0.879367	0.0816925	-0.396813	-0.287696	-1.01555	0.0686515	-0.890442		not_detected	not_detected	not_detected	not_detected	not_detected	not_detected		not_detected	not_detected	not_detected	not_detected	not_detected	not_detected	not_detected	not_detected	not_detected	not_detected	not_detected	0.987103	-0.216176	2.15903	0.780411			negative	negative	-0.338739	-0.278326
349012a1e49c152	2	negative	0	0	0																																								negative	negative
8bea9dd7d27e2e5	14	negative	0	0	0	1.95316	2.23328	-0.730964	-1.33564	1.33613	0.616882	1.33951	-0.456373	0.692611	1.22361	-0.119138	0.666931	0.410073	-0.271247	-0.6252	not_detected	not_detected	not_detected	not_detected	not_detected	not_detected		not_detected	not_detected	not_detected	not_detected	not_detected	not_detected	not_detected	not_detected	not_detected	not_detected	not_detected	-0.635476	0.528158	-0.521453	0.608106	-0.305787	-0.934388
6bbad76897ad747	0	negative	0	0	0																not_detected	not_detected	not_detected	not_detected	not_detected	not_detected		not_detected	not_detected	not_detected	not_detected	not_detected	not_detected	not_detected	not_detected	not_detected	detected	not_detected
6420a6396cead41	11	negative	0	0	0																not_detected	not_detected	not_detected	not_detected	not_detected	not_detected		not_detected	not_detected	not_detected	not_detected	not_detected	not_detected	not_detected	not_detected	not_detected	not_detected	not_detected
c5e3470b174d0c2	11	negative	0	0	0
e02ece73373079e	16	negative	0	0	0																not_detected	not_detected	not_detected	not_detected	not_detected	not_detected		not_detected	not_detected	not_detected	not_detected	not_detected	not_detected	not_detected	not_detected	not_detected	not_detected	not_detected
ac7bfb7cefc7742	2	negative	0	0	0																																								negative	negative
68ecb65b918b86c	0	negative	0	0	0																																								negative	negative
343ccfba6b79d61	11	negative	0	0	0
5e52726895401bb	13	negative	0	0	0																not_detected	not_detected	not_detected	not_detected	not_detected	not_detected		not_detected	not_detected	not_detected	not_detected	not_detected	not_detected	not_detected	not_detected	not_detected	not_detected	not_detected
5cae9fd63071042	13	negative	0	0	0	-0.907913	-0.836868	0.286543	-1.44784	-0.850035	1.30773	0.0449914	-0.909968	0.692611	0.0736314	0.133698	0.0460154	-0.43035	-0.18279		not_detected	not_detected	not_detected	not_detected	not_detected	not_detected		not_detected	not_detected	not_detected	not_detected	not_detected	not_detected	not_detected	not_detected	not_detected	not_detected	not_detected	-1.08619	-0.737209		-0.839255	-0.80011	0.503132	negative	negative	0.984365	0.263596	-0.274455
45795e5c91df9c0	16	negative	0	0	0
04040d0be0b55c6	2	negative	0	0	0																not_detected	not_detected	not_detected	not_detected	not_detected	not_detected		not_detected	not_detected	not_detected	not_detected	not_detected	not_detected	not_detected	not_detected	not_detected	not_detected	not_detected
d9c1fb0abb4c549	7	negative	0	0	0																not_detected	not_detected	not_detected	not_detected	not_detected	not_detected		not_detected	not_detected	not_detected	not_detected	not_detected	not_detected	not_detected	not_detected	not_detected	not_detected	not_detected							negative	negative
f321d8a77fc620e	9	negative	0	0	0
9282f2e5d599bf1	9	negative	0	0	0
8308f61e1d114b6	4	negative	0	0	0	0.694287	0.729532	-0.140559	-1.44784	0.41935	1.14568	0.343725	-0.553771	1.91445	0.439533	0.217977	0.346459	1.30302	-0.713529	-0.655484	not_detected	not_detected	not_detected	not_detected	not_detected	detected		not_detected	not_detected	not_detected	not_detected	not_detected	not_detected	not_detected	not_detected	not_detected	not_detected	not_detected	-1.52052	-0.365042	-0.441973	-0.253418	-0.80011	-0.215628
7458e7550dc86e4	13	negative	0	0	0																not_detected	not_detected	not_detected	not_detected	not_detected	not_detected		not_detected	not_detected	not_detected	not_detected	not_detected	not_detected	not_detected	not_detected	not_detected	not_detected	not_detected
92f0372f2cba4fe	16	negative	0	0	0
1e4359ad80c528c	7	negative	0	0	0																																								negative	negative
286e908466e31de	1	negative	0	0	0																not_detected	not_detected	detected	not_detected	not_detected	not_detected		not_detected	not_detected	not_detected	not_detected	not_detected	not_detected	not_detected	not_detected	not_detected	not_detected	not_detected
4214c3a859856d8	14	negative	0	0	0																not_detected	not_detected	not_detected	not_detected	not_detected	not_detected		detected	not_detected	not_detected	not_detected	not_detected	not_detected	not_detected	not_detected	not_detected	not_detected	not_detected
624a47393b12c14	2	negative	0	0	0
80103ce365295be	2	negative	0	0	0
ed9e30f75d9541b	14	negative	0	0	0																not_detected	not_detected	not_detected	not_detected	not_detected	detected		not_detected	not_detected	not_detected	not_detected	not_detected	not_detected	not_detected	not_detected	not_detected	not_detected	not_detected
559fd87519a7a6c	17	negative	0	0	0
f08bc2df53d3662	2	negative	0	0	0
bc207bbf6cfdd6b	8	negative	0	0	0	-0.129702	-0.210308	0.625712	-0.101517	-0.426907	0.45483	-0.353319	0.734662	0.0816925	0.387261	1.39788	0.626871	-0.614192	-0.713529																				-0.4388	-0.216176	-0.439986	-0.356801	-1.54159	-0.215628	negative	negative
dffca6bbe066567	2	negative	0	0	0
fc4cccb47e95110	13	negative	0	0	0																not_detected	not_detected	not_detected	not_detected	not_detected	not_detected		not_detected	not_detected	not_detected	not_detected	not_detected	not_detected	not_detected	not_detected	not_detected	not_detected	not_detected
49e0440cdfbabb4	3	negative	0	0	0																not_detected	not_detected	not_detected	not_detected	not_detected	not_detected		not_detected	not_detected	not_detected	not_detected	not_detected	not_detected	not_detected	not_detected	not_detected	not_detected	not_detected
d4722cc4977c7b4	2	negative	0	0	0																not_detected	not_detected	not_detected	not_detected	not_detected	detected		not_detected	not_detected	not_detected	not_detected	not_detected	not_detected	not_detected	not_detected	not_detected	not_detected	not_detected
95d25f6d6252b61	0	negative	0	0	0																not_detected	not_detected	not_detected	not_detected	not_detected	detected		not_detected	not_detected	not_detected	not_detected	not_detected	not_detected	not_detected	not_detected	not_detected	not_detected	not_detected
d74866c50cbd207	8	negative	0	0	0
24ede94d1b24408	0	negative	0	0	0																																								negative	negative
0d6764a3d28282a	16	negative	0	0	0																not_detected	not_detected	not_detected	not_detected	not_detected	not_detected		not_detected	not_detected	not_detected	not_detected	not_detected	not_detected	not_detected	not_detected	not_detected	not_detected	not_detected
590fb6201817a15	2	negative	0	0	0
be653bb392611ab	11	negative	0	0	0																not_detected	not_detected	not_detected	not_detected	not_detected	not_detected		not_detected	not_detected	not_detected	not_detected	not_detected	not_detected	not_detected	not_detected	not_detected	not_detected	not_detected
5318f6b0e8a0eda	8	negative	0	0	0
b47d990f10d281a	9	negative	0	0	0
3e6d21e23c7d5bf	3	negative	0	0	0																not_detected	not_detected	not_detected	not_detected	not_detected	detected		not_detected	not_detected	not_detected	not_detected	not_detected	not_detected	not_detected	not_detected	not_detected	not_detected	not_detected							negative	negative
bab41272a5e46e4	1	negative	0	0	0
3f29210bf4ba05b	2	negative	0	0	0																not_detected	not_detected	not_detected	not_detected	not_detected	not_detected		not_detected	not_detected	not_detected	not_detected	not_detected	not_detected	not_detected	not_detected	not_detected	not_detected	not_detected
435fa93e82033ae	2	negative	0	0	0
0d4c2e4d70cc3aa	2	negative	0	0	0
3b7df54fc840570	1	negative	0	0	0
07c04ed8f0bb53e	7	negative	0	0	0
6f0fdbe675d3d51	11	negative	0	0	0																not_detected	not_detected	not_detected	not_detected	not_detected	not_detected		not_detected	not_detected	not_detected	not_detected	not_detected	not_detected	not_detected	not_detected	not_detected	not_detected	not_detected
b7857147be7496a	18	negative	0	0	0
ad8fe3895e3dbbd	9	negative	0	0	0																not_detected	not_detected	not_detected	not_detected	not_detected	not_detected		not_detected	not_detected	not_detected	not_detected	not_detected	not_detected	not_detected	not_detected	not_detected	not_detected	not_detected
13c2b123899c4a3	18	negative	0	0	0																not_detected	not_detected	not_detected	not_detected	not_detected	detected		not_detected	not_detected	not_detected	not_detected	not_detected	not_detected	not_detected	not_detected	not_detected	not_detected	not_detected
d3c2e312040702d	13	negative	0	0	0																not_detected	not_detected	not_detected	not_detected	not_detected	not_detected		not_detected	not_detected	not_detected	not_detected	not_detected	not_detected	not_detected	not_detected	not_detected	not_detected	not_detected
c81e1f0ba2f5931	2	negative	0	0	0
9d7c293a6773d6a	14	positive	0	0	0	-0.312811	-0.6489	-0.0275024	-0.101517	-0.656101	-0.0995574	-1.44868	-0.968407	-0.529226	0.0213606	0.175837	0.807138	1.51313	0.347948	-0.110364	not_detected	not_detected	not_detected	not_detected	not_detected	not_detected		not_detected	not_detected	not_detected	not_detected	not_detected	not_detected	not_detected	not_detected	not_detected	not_detected	not_detected	-0.315877	0.304858	-0.479726	-0.0466523	0.682859	1.94065	negative	negative	-0.504127	-0.394452	-0.409223
5f8befe75c3d37c	1	negative	0	0	0
c053473e58990df	11	negative	0	0	0																not_detected	not_detected	not_detected	not_detected	not_detected	not_detected		not_detected	not_detected	not_detected	not_detected	not_detected	not_detected	not_detected	not_detected	not_detected	not_detected	not_detected
25ef5f355ba0e01	3	negative	0	0	0																not_detected	not_detected	not_detected	not_detected	not_detected	not_detected		not_detected	not_detected	not_detected	not_detected	not_detected	not_detected	not_detected	not_detected	not_detected	not_detected	not_detected
402d7f5f139392c	16	negative	0	0	0																not_detected	not_detected	not_detected	not_detected	not_detected	not_detected		not_detected	not_detected	detected	not_detected	not_detected	not_detected	not_detected	not_detected	not_detected	not_detected	not_detected
ff5ec3abd7d6088	5	positive	0	0	0
0bead9c231acd21	8	negative	0	0	0
bddadc6bab93ea6	9	negative	0	0	0
aa5db0957377b4b	12	negative	0	0	0
e8acd57e6cb7ec8	18	negative	0	0	0
51d26c8f23b1c0c	2	negative	0	0	0																																								negative	negative
e595c6c0d7fd167	16	negative	0	0	0																not_detected	not_detected	not_detected	not_detected	detected	not_detected		not_detected	not_detected	not_detected	not_detected	not_detected	not_detected	not_detected	not_detected	not_detected	not_detected	not_detected							negative	negative
40f5f403ca2cc5b	7	negative	0	0	0																not_detected	not_detected	not_detected	not_detected	not_detected	not_detected		not_detected	not_detected	not_detected	not_detected	not_detected	not_detected	not_detected	not_detected	not_detected	not_detected	not_detected
453e4322c53dbdb	16	negative	0	0	0																not_detected	not_detected	not_detected	not_detected	not_detected	not_detected		not_detected	not_detected	not_detected	not_detected	not_detected	not_detected	not_detected	detected	not_detected	not_detected	not_detected							negative	positive
616888511131c09	19	negative	0	0	0																																								negative	negative
5c0d64de32e9b53	2	negative	0	0	0																not_detected	not_detected	detected	not_detected	not_detected	not_detected		not_detected	not_detected	not_detected	not_detected	not_detected	not_detected	not_detected	not_detected	not_detected	not_detected	not_detected							negative	negative
cf4b7d383fd838d	1	negative	0	0	0																not_detected	not_detected	not_detected	not_detected	not_detected	detected		not_detected	not_detected	not_detected	not_detected	not_detected	not_detected	not_detected	detected	not_detected	not_detected	not_detected							negative	negative
05448eec447b12e	17	negative	0	0	0																not_detected	not_detected	detected	not_detected	not_detected	not_detected		not_detected	not_detected	not_detected	not_detected	not_detected	not_detected	not_detected	not_detected	not_detected	not_detected	not_detected
d23cfaedb202090	2	negative	0	0	0																not_detected	not_detected	not_detected	not_detected	not_detected	detected		not_detected	not_detected	not_detected	not_detected	not_detected	not_detected	not_detected	not_detected	not_detected	not_detected	not_detected							negative	negative
d97ac772c1f9c57	1	negative	0	0	0																																								negative	negative
0ca1c1007dfebff	2	negative	0	0	0
7b1d6bf5993aa9b	9	positive	0	0	0																																								negative	negative
a6416e5900ae89f	10	negative	0	0	0																not_detected	not_detected	not_detected	not_detected	not_detected	not_detected		not_detected	not_detected	not_detected	not_detected	not_detected	not_detected	not_detected	detected	not_detected	not_detected	not_detected							negative	negative
2f0ad2a9af8113f	2	negative	0	0	0																not_detected	not_detected	not_detected	not_detected	not_detected	detected		not_detected	not_detected	not_detected	not_detected	not_detected	not_detected	not_detected	not_detected	not_detected	not_detected	not_detected							negative	negative
fe55e8f49044848	3	negative	0	0	0																not_detected	not_detected	not_detected	not_detected	not_detected	not_detected		not_detected	not_detected	not_detected	not_detected	not_detected	not_detected	not_detected	not_detected	not_detected	not_detected	not_detected							negative	negative
d7d46e63f6cd0d7	15	negative	0	0	0																not_detected	not_detected	not_detected	not_detected	not_detected	not_detected		not_detected	not_detected	not_detected	not_detected	not_detected	not_detected	not_detected	not_detected	not_detected	not_detected	not_detected
f712f34f086c519	13	negative	0	0	0																not_detected	detected	not_detected	not_detected	not_detected	not_detected		not_detected	not_detected	not_detected	not_detected	not_detected	not_detected	not_detected	not_detected	not_detected	not_detected	not_detected
06dfb5a8460d17a	0	negative	0	0	0																not_detected	not_detected	not_detected	not_detected	not_detected	not_detected		not_detected	not_detected	not_detected	not_detected	not_detected	not_detected	not_detected	not_detected	not_detected	not_detected	not_detected
19b6d503eaeb359	11	negative	0	0	0																not_detected	not_detected	not_detected	not_detected	not_detected	not_detected		not_detected	not_detected	not_detected	not_detected	not_detected	not_detected	not_detected	not_detected	not_detected	not_detected	not_detected
16c6b57d047840b	17	negative	0	0	0
b41088a2e9862a0	14	negative	0	0	0
7d373a4b133415e	15	negative	0	0	0
7190cf04fdf2c9b	18	negative	0	0	0
548644a342c7115	16	negative	0	0	0
f4fcf16f579e291	8	negative	0	0	0	1.12917	1.10547	-0.00237881	-1.11126	1.15983	-1.14863	0.144572	1.37749	-0.529226	-0.239998	-0.793368	-0.334546	-0.614192	-0.978899																				1.54435	-0.365042	1.06816	0.40134	0.435697	-1.29377
e7cf26b62b11e2b	2	negative	0	0	0
cf71439940482db	1	negative	0	0	0
4b67998779ce698	8	negative	0	0	0																																								positive	negative
c40be665bb3a869	1	negative	0	0	0
45e235a690b7cc3	14	negative	0	0	0
998c7ba8a5a7342	2	negative	0	0	0																not_detected	not_detected	not_detected	not_detected	not_detected	not_detected		not_detected	not_detected	not_detected	not_detected	not_detected	not_detected	not_detected	detected	not_detected	not_detected	not_detected							negative	positive
b533a7b72177c3d	15	negative	0	0	0																not_detected	not_detected	not_detected	detected	not_detected	not_detected		not_detected	not_detected	not_detected	not_detected	not_detected	not_detected	not_detected	not_detected	not_detected	not_detected	not_detected							negative	negative
6e1ad0dafe0786e	14	negative	0	0	0																not_detected	not_detected	not_detected	not_detected	not_detected	detected		not_detected	not_detected	not_detected	not_detected	not_detected	not_detected	not_detected	not_detected	not_detected	not_detected	not_detected
648cc1927ba6326	15	negative	0	0	0
0aec4fc54dc4bb9	16	negative	0	0	0																detected	not_detected	not_detected	not_detected	not_detected	detected		not_detected	not_detected	not_detected	not_detected	not_detected	not_detected	not_detected	not_detected	not_detected	not_detected	not_detected							negative	negative
5098651486e4b7a	10	negative	0	0	0	-0.747693	-0.711556	-0.278739	-0.325903	-1.02634	0.523063	-0.0545852	-0.614992	-1.14014	0.700891	-0.835508	0.807138	1.09292	-0.44816		not_detected	not_detected	detected	not_detected	not_detected	detected		not_detected	not_detected	not_detected	not_detected	not_detected	not_detected	not_detected	not_detected	not_detected	not_detected	not_detected		-0.737209	-0.519466	-0.632489	-0.80011	0.143752	positive	negative
41fc45c0ef87f8c	0	negative	0	0	0																not_detected	not_detected	not_detected	not_detected	not_detected	detected		not_detected	not_detected	not_detected	not_detected	detected	not_detected	not_detected	not_detected	not_detected	not_detected	not_detected							negative	negative
76157b32a35e86e	11	negative	0	0	0
1e7e33688edc5a9	11	positive	1	0	0																not_detected	not_detected	not_detected	not_detected	not_detected	not_detected		not_detected	not_detected	not_detected	not_detected	not_detected	not_detected	not_detected	not_detected	not_detected	not_detected	not_detected
29e1caeb3673875	4	negative	0	0	0
96969f7153e0647	2	negative	0	0	0																not_detected	not_detected	not_detected	not_detected	not_detected	not_detected		not_detected	not_detected	not_detected	not_detected	not_detected	not_detected	not_detected	not_detected	not_detected	not_detected	not_detected
ca0efab8c0d3140	1	negative	0	0	0																not_detected	not_detected	not_detected	not_detected	not_detected	not_detected		not_detected	not_detected	not_detected	not_detected	not_detected	not_detected	not_detected	detected	not_detected	not_detected	not_detected
4e203e38824457b	0	negative	0	0	0																																								negative	negative
24bbf1c3b6783ae	15	negative	0	0	0																not_detected	not_detected	not_detected	not_detected	not_detected	not_detected		not_detected	not_detected	not_detected	not_detected	not_detected	not_detected	not_detected	not_detected	not_detected	not_detected	not_detected
2a5db9bbb45109f	14	positive	0	0	0	-0.518807	-0.272964	-0.21593	0.459449	-0.515058	-0.457777	0.941197	-0.57325	-0.223767	0.439533	-0.70909	0.0660446	2.53739	-0.801985	-0.29207	not_detected	not_detected	not_detected	not_detected	not_detected	not_detected		not_detected	not_detected	not_detected	not_detected	not_detected	not_detected	not_detected	not_detected	not_detected	not_detected	not_detected	-0.127395	-0.588343	-0.340635	0.435801	-0.80011	-0.575008	negative	negative	0.59846	0.14747	0.624001
0c95b0502528c5a	12	negative	0	0	0
f014d469cd0fd69	9	negative	0	0	0																not_detected	not_detected	not_detected	not_detected	not_detected	not_detected		not_detected	not_detected	not_detected	not_detected	not_detected	not_detected	not_detected	not_detected	not_detected	not_detected	not_detected
6162d1b9279c237	16	negative	0	0	0																not_detected	not_detected	not_detected	not_detected	not_detected	detected		not_detected	not_detected	not_detected	not_detected	not_detected	not_detected	not_detected	not_detected	not_detected	not_detected	not_detected							negative	negative
990aca262885dff	1	negative	0	0	0
1745b3227318c07	1	negative	0	0	0
3fc734fd9bafbd6	18	positive	1	0	0
f458f769ff1c858	15	negative	0	0	0																not_detected	not_detected	not_detected	not_detected	not_detected	not_detected		not_detected	not_detected	not_detected	not_detected	not_detected	not_detected	not_detected	not_detected	not_detected	not_detected	not_detected
0b84b3c385f5737	11	negative	0	0	0																not_detected	not_detected	not_detected	not_detected	not_detected	not_detected		not_detected	not_detected	not_detected	not_detected	not_detected	not_detected	not_detected	not_detected	not_detected	not_detected	not_detected							negative	negative
8639109c192cd20	8	negative	0	0	0
c6d6dd49788e753	2	negative	0	0	0																																								negative	negative
b545cb36b04159f	0	negative	0	0	0																detected	not_detected	not_detected	not_detected	not_detected	not_detected		not_detected	not_detected	not_detected	not_detected	not_detected	not_detected	not_detected	not_detected	not_detected	not_detected	not_detected
c4f3171c1785dbb	7	negative	0	0	0
891aac100cdc625	1	negative	0	0	0
d2ad8d169b63e95	9	negative	0	0	0
a2091c995541513	1	negative	0	0	0
bb351228b0cc864	0	negative	0	0	0																not_detected	not_detected	not_detected	not_detected	not_detected	not_detected		not_detected	not_detected	not_detected	not_detected	detected	not_detected	not_detected	not_detected	not_detected	not_detected	not_detected
9bd1c8c67b6cb11	19	negative	0	1	0	-0.885025	-0.836868	-0.454604	-0.213711	-0.991078	-1.35333	-0.0545852	1.06303	-1.14014	0.387261	-0.835508	0.426576	-1.00814	0.790231	0.586179	not_detected	not_detected	not_detected	not_detected	not_detected	not_detected		detected	not_detected	not_detected	not_detected	not_detected	not_detected	not_detected	not_detected	not_detected	not_detected	not_detected		1.42136	0.309118	-0.529106	-1.04727	0.862512			-0.173351	0.341014	-0.3643
7a148219ed1260c	14	negative	0	0	0	-0.289922	-0.272964	0.387037	-0.886869	-0.56795	0.63394	0.0449914	-0.676214	0.0816925	0.596348	-0.0769989	0.626871	-0.587929	-0.890442		not_detected	not_detected	not_detected	not_detected	not_detected	not_detected		not_detected	not_detected	not_detected	not_detected	not_detected	not_detected	not_detected	not_detected	not_detected	not_detected	not_detected	-0.332266		-0.521453
245901e3f32b751	19	negative	0	0	0
3e85e04deb6419e	2	negative	0	0	0
0dfcc50363d4e93	17	negative	0	0	0	1.54116	0.980156	-0.643031	1.35699	1.98845	0.81305	-1.54826	0.139144	0.0816925	-1.65133	-0.329835	-1.07564	-0.509139	0.524862		not_detected	not_detected	not_detected	not_detected	not_detected	not_detected		not_detected	not_detected	not_detected	not_detected	not_detected	not_detected	not_detected	not_detected	not_detected	not_detected	not_detected	-0.479774		-0.521453
62a935da4a7ab3f	5	negative	0	0	0
9fc2c7acda5c09e	17	negative	0	0	0
9ee4eb6acef9596	0	negative	0	0	0
2e34dbf6ebc86b7	16	negative	0	0	0
f24d44b8a4a265e	5	negative	0	0	0
adf6836851bf5bf	2	negative	0	0	0																																								negative	negative
910302e11cca1e3	11	negative	0	0	0
67600adcb885e86	14	negative	0	0	0																not_detected	not_detected	not_detected	not_detected	not_detected	detected		not_detected	not_detected	not_detected	not_detected	not_detected	not_detected	not_detected	not_detected	not_detected	not_detected	not_detected
e586524f71166bc	18	negative	0	0	0	-0.106813	0.228284	-0.454604	1.69357	-0.356385	0.830108	1.33951	-0.962841	0.0816925	1.06679	0.00727989	0.506694	-0.482876	-1.06736		not_detected	not_detected	not_detected	not_detected	detected	not_detected		not_detected	not_detected	not_detected	not_detected	not_detected	not_detected	not_detected	not_detected	not_detected	not_detected	not_detected	-0.586307		-0.533375
057e8ce3c6f2f31	14	positive	0	0	0
f0ee30f04652697	11	positive	0	0	0																not_detected	not_detected	not_detected	not_detected	not_detected	not_detected		not_detected	not_detected	not_detected	not_detected	not_detected	not_detected	not_detected	not_detected	not_detected	not_detected	not_detected
0b644d31f09d9b5	2	negative	0	0	0																not_detected	not_detected	detected	not_detected	not_detected	not_detected		not_detected	not_detected	not_detected	not_detected	not_detected	not_detected	not_detected	not_detected	not_detected	not_detected	not_detected							positive	negative
8fac8033edbd319	13	positive	0	0	0
52e1d00fc88d2df	16	negative	0	0	0
8e509148b40f4c2	11	negative	0	0	0
0057f527d9e0d1f	11	negative	0	0	0																not_detected	not_detected	not_detected	not_detected	not_detected	detected		not_detected	not_detected	not_detected	not_detected	not_detected	not_detected	not_detected	not_detected	not_detected	not_detected	not_detected
5948da3e640cf90	15	negative	0	0	0	1.28939	1.10547	-0.178244	-1.56003	0.948261	-0.850113	-0.353319	-0.308885	-0.223767	0.125903	-0.70909	0.326428	-0.299034	0.878687	-0.201217	not_detected	not_detected	not_detected	not_detected	not_detected	not_detected		not_detected	not_detected	not_detected	not_detected	not_detected	not_detected	not_detected	not_detected	not_detected	not_detected	not_detected	1.13461	-0.588343	0.434299	0.780411	-0.552949	-0.575008
219ad2543c93936	14	positive	0	0	0
c18f904655822c1	5	negative	0	0	0
cc6eb63106e2604	17	negative	0	0	0
5d98b147c2b7527	3	negative	0	0	0
ff34f2c79fc6cf0	7	positive	1	0	0																																								negative	negative
1f3c363371d0462	10	negative	0	0	0
b3dc3c4748605b9	4	negative	0	0	0
d12d8b62261586c	8	negative	0	0	0																not_detected	not_detected	not_detected	not_detected	not_detected	detected		not_detected	not_detected	not_detected	not_detected	not_detected	not_detected	not_detected	not_detected	not_detected	not_detected	not_detected
06a82d243cc4aaf	4	negative	0	0	0
534bbb1716dc92d	0	negative	0	0	0																not_detected	not_detected	detected	not_detected	not_detected	not_detected		not_detected	not_detected	not_detected	not_detected	not_detected	not_detected	not_detected	not_detected	not_detected	not_detected	not_detected
1e283862e0b24b7	5	negative	0	0	0
81f5cfe5a267a74	19	negative	0	0	0
75253652507e10d	19	negative	0	0	0	-0.587474	-0.523588	-0.303862	0.683835	-1.07923	-0.014267	0.144572	-0.884923	0.692611	1.22361	1.77713	1.26782	1.43434	-0.890442		not_detected	not_detected	not_detected	not_detected	not_detected	not_detected		not_detected	not_detected	not_detected	not_detected	not_detected	not_detected	not_detected	not_detected	not_detected	detected	not_detected	-0.717424	1.04919		-0.770333	0.188535	0.503132			-0.393869	0.0313438
c8a1a045e4274c2	2	negative	0	0	0
64fb5012add3f8c	2	negative	0	0	0																not_detected	not_detected	not_detected	not_detected	not_detected	not_detected		not_detected	not_detected	not_detected	not_detected	not_detected	not_detected	not_detected	detected	not_detected	not_detected	not_detected
f32483d94b1c426	1	negative	0	0	0
1087bee5a183b3b	0	negative	0	0	0
34c3c6c67798180	2	negative	0	0	0
5f93dae56550e6c	1	negative	0	0	0																																								negative	negative
6870bf82d6ef300	2	negative	0	0	0	1.60983	1.66937	-0.404357	0.571643	1.82978	1.63184	0.542882	0.0612261	0.387152	-0.396813	-0.287696	-0.715108	-0.824298	-0.801985																				-1.21731	0.677025		-0.0466523
8911dde49eac91b	18	negative	0	0	0	0.694287	0.980156	0.273981	0.683835	0.119635	0.309837	1.23993	-0.837616	1.30353	1.43269	8.35088	0.967375	-0.640455	-0.44816		not_detected	not_detected	not_detected	not_detected	not_detected	not_detected		not_detected	not_detected	not_detected	not_detected	not_detected	not_detected	not_detected	not_detected	not_detected	not_detected	not_detected	-1.709		-0.507544		0.682859	1.58127
cda94bb66402999	2	negative	0	0	0
e22fe0f49496229	1	negative	0	0	0
4b5d0eed3a13634	2	negative	0	0	0
13e76413abf3eed	12	negative	0	0	0
306ea2bcd7f802b	15	negative	0	0	0																not_detected	not_detected	not_detected	not_detected	not_detected	detected		not_detected	not_detected	not_detected	not_detected	not_detected	not_detected	not_detected	not_detected	not_detected	not_detected	not_detected
98397336706126b	6	negative	0	0	0
116778c7cd1a523	2	negative	0	0	0	-0.244145	-0.0849959	0.927195	0.796029	-0.268233	-0.756294	0.542882	0.62335	0.387152	0.334989	0.0494192	0.0460154	0.226231	0.171035		not_detected	not_detected	not_detected	not_detected	not_detected	detected		not_detected	not_detected	not_detected	not_detected	not_detected	not_detected	not_detected	not_detected	not_detected	not_detected	not_detected	0.692089		0.22765				negative	negative
cfa46bf3470e0d6	4	negative	0	0	0
8863913500ca8cb	10	negative	0	0	0
fe524dfe2d9e4c3	7	negative	0	0	0																																								negative	negative
fbec53bbe8c576a	6	positive	0	0	0																not_detected	not_detected	not_detected	not_detected	not_detected	not_detected		not_detected	not_detected	not_detected	not_detected	not_detected	detected	not_detected	not_detected	not_detected	not_detected	not_detected
fa70a95f82bc69e	19	negative	0	0	0
3f0ab6e31aa99b4	11	negative	0	0	0																																								negative	negative
72f197e9b72dcc5	2	negative	0	0	0																																								negative	negative
474b1665f605f95	2	negative	0	0	0																																								negative	negative
9ad95bca8d6d170	2	negative	0	0	0																																								negative	negative
5241fb0f6da52f9	8	negative	0	0	0																not_detected	not_detected	not_detected	not_detected	not_detected	detected		not_detected	not_detected	not_detected	not_detected	not_detected	not_detected	not_detected	not_detected	not_detected	not_detected	not_detected
99d9f2eb3ce15b1	4	negative	0	0	0																not_detected	not_detected	not_detected	not_detected	not_detected	detected		not_detected	not_detected	not_detected	not_detected	not_detected	not_detected	not_detected	not_detected	not_detected	not_detected	not_detected							negative	negative
991fbad7401a77e	3	negative	0	0	0																not_detected	not_detected	not_detected	not_detected	not_detected	not_detected		not_detected	not_detected	not_detected	not_detected	not_detected	not_detected	not_detected	detected	not_detected	not_detected	not_detected							negative	positive
f72ce98cd9eeea5	4	negative	0	0	0
e7059346cf9d483	15	negative	0	0	0
5e8a7afa2230325	2	negative	0	0	0
76ac33167dc9200	0	negative	0	0	0
b1cadd531af20cb	0	negative	0	0	0
eda57d23441ef2d	9	negative	0	0	0	-0.679027	-0.774212	-0.580222	0.0106766	-1.13212	0.497476	-0.552476	-0.801439	-0.529226	0.805435	0.386534	1.20773	0.357547	-0.625073		not_detected	not_detected	not_detected	not_detected	not_detected	not_detected		detected	not_detected	not_detected	not_detected	not_detected	not_detected	not_detected	not_detected	not_detected	not_detected	not_detected	-0.569917	-0.290609	-0.521453	-0.529106	-0.0586259	-0.215628			-0.531692	-0.355744
5f3d03cf70de752	12	negative	0	0	0																not_detected	not_detected	not_detected	not_detected	not_detected	detected		not_detected	not_detected	not_detected	not_detected	not_detected	not_detected	not_detected	not_detected	not_detected	not_detected	not_detected
73d2d41f167f5cf	15	negative	0	0	0
9df1d71edda8388	2	negative	0	0	0
f0c4f09d672977d	13	negative	0	0	0
d44f8c729f254fd	0	negative	0	0	0																detected	not_detected	not_detected	not_detected	not_detected	not_detected		not_detected	not_detected	not_detected	not_detected	not_detected	not_detected	not_detected	not_detected	not_detected	not_detected	not_detected							negative	negative
b78f8c3ee4c17db	1	negative	0	0	0
af4e2526ef6967c	2	negative	0	0	0																not_detected	not_detected	not_detected	not_detected	not_detected	not_detected		not_detected	not_detected	not_detected	not_detected	not_detected	not_detected	not_detected	not_detected	detected	not_detected	not_detected
80a6ff73ecfc9d0	17	negative	0	0	0
74ffed87ffb9a38	18	negative	0	0	0	1.03762	1.54406	-1.22087	1.02042	1.17746	-1.37891	2.03656	1.40253	-0.223767	0.439533	-0.793368	-0.514813	-0.719245	-0.44816		not_detected	not_detected	not_detected	not_detected	not_detected	not_detected		not_detected	not_detected	not_detected	not_detected	not_detected	not_detected	not_detected	not_detected	not_detected	not_detected	not_detected	1.73283		0.221689				negative	negative
22bb32885956830	13	negative	0	0	0																not_detected	not_detected	not_detected	not_detected	not_detected	detected		not_detected	not_detected	not_detected	not_detected	not_detected	not_detected	not_detected	not_detected	not_detected	not_detected	not_detected
8a525419d6385a0	9	negative	0	0	0																not_detected	not_detected	not_detected	not_detected	not_detected	not_detected		not_detected	not_detected	not_detected	not_detected	not_detected	not_detected	not_detected	detected	not_detected	not_detected	not_detected
b687db51e196ebf	1	negative	0	0	0																																								negative	negative
02b37b845e6a663	7	negative	0	0	0																not_detected	not_detected	not_detected	not_detected	not_detected	not_detected		not_detected	not_detected	not_detected	not_detected	not_detected	not_detected	not_detected	not_detected	not_detected	not_detected	not_detected
b90a3363ce0a950	16	negative	0	0	0	-0.564585	-0.398276	0.902071	1.91796	-0.955817	0.898341	0.542882	-0.21427	0.0816925	1.17134	-0.498393	1.00743	0.0686515	-0.0058775																				-0.742009	-0.737209	-0.533375	-0.66695	0.188535	0.503132			-0.338739	-0.433161	-0.3643
4530c6be54542d0	5	negative	0	0	0
ce16557e38f5be1	2	negative	0	0	0
a8a36aff9e3041f	2	negative	0	0	0
07d1cf255c9d5ae	3	negative	0	0	0
28c863302fee754	2	negative	0	0	0																not_detected	not_detected	not_detected	not_detected	not_detected	not_detected		not_detected	not_detected	not_detected	not_detected	not_detected	not_detected	not_detected	not_detected	not_detected	not_detected	not_detected
0fc2ca1ecdd09e6	2	negative	0	0	0
4f0600ba8fcede9	4	negative	0	0	0
66d288d2a12ca60	14	positive	0	0	0
ba5d620cc292859	15	negative	0	0	0
03b86b930a66716	2	negative	0	0	0																																								negative	negative
c1bc80d4e96eca0	13	negative	0	0	0
f0ce055e2367394	11	negative	0	0	0																not_detected	not_detected	not_detected	not_detected	not_detected	not_detected		not_detected	not_detected	not_detected	not_detected	not_detected	not_detected	not_detected	not_detected	not_detected	not_detected	not_detected
45aa90fb28518c3	3	negative	0	0	0																																								negative	negative
99b98d69c9dab1f	0	negative	0	0	0																not_detected	not_detected	not_detected	not_detected	not_detected	detected		not_detected	not_detected	not_detected	not_detected	not_detected	not_detected	not_detected	not_detected	not_detected	not_detected	not_detected
816b06a76474804	11	negative	0	0	0
0833630f4d3f160	1	negative	0	0	0
c5a55d20ff9a550	1	negative	0	0	0
5ff9ceaa42a2c45	5	negative	0	0	0
3f3215f9bd76961	13	negative	0	0	0
666035a131f221f	4	negative	0	0	0	0.328069	0.792188	0.0604302	2.36673	0.154896	0.45483	1.8374	-0.189225	1.30353	1.06679	0.555092	0.22628	0.357547	-0.625073																				-0.635476								-0.504127	-0.239617	-0.454146
c52981a2095123d	16	negative	0	0	0	-0.221256	-0.210308	0.512655	-1.11126	-0.708992	1.93036	0.0449914	0.0862713	-0.834685	1.01452	-0.624811	1.10758	-0.456613	-0.18279		not_detected	not_detected	not_detected	not_detected	not_detected	detected		not_detected	not_detected	not_detected	not_detected	not_detected	not_detected	not_detected	not_detected	not_detected	not_detected	not_detected	-1.48774	-0.588343	-0.501583	-0.598028	-0.552949	-0.215628
30061a1d283a5d4	2	negative	0	0	0																not_detected	not_detected	not_detected	not_detected	not_detected	detected		not_detected	not_detected	not_detected	not_detected	not_detected	not_detected	not_detected	not_detected	not_detected	not_detected	not_detected
58fc89b988002ce	2	negative	0	0	0																not_detected	not_detected	not_detected	not_detected	not_detected	detected		not_detected	not_detected	not_detected	not_detected	not_detected	not_detected	not_detected	not_detected	not_detected	not_detected	not_detected
5c1421eb95ab55c	18	negative	0	0	0	-0.0839249	-0.147652	-0.442042	0.459449	-0.285863	-0.338371	-0.253742	-0.0333889	1.30353	0.230447	0.555092	0.406546	0.935337	0.878687																				-0.053642	-0.439476	0.142209	-0.0466523	1.17718	1.94065
7e367b149557f41	16	negative	0	0	0
979b4d7c39dcc04	8	negative	0	0	0
f10cde6457d919c	0	negative	0	0	0																not_detected	not_detected	not_detected	not_detected	not_detected	not_detected		not_detected	not_detected	not_detected	not_detected	not_detected	not_detected	not_detected	not_detected	not_detected	not_detected	not_detected
de46240cb4e7b2e	1	negative	0	0	0																not_detected	not_detected	detected	not_detected	not_detected	not_detected		not_detected	not_detected	not_detected	not_detected	not_detected	not_detected	not_detected	not_detected	not_detected	not_detected	not_detected
a8dde726b8d2964	9	negative	0	0	0
a5468e39f67e6d4	7	negative	0	0	0
13cbebaf8c7cf6a	11	negative	0	0	0	-0.198368	-0.33562	-0.542537	1.69357	-0.197712	0.719231	-0.552476	-0.11409	-0.223767	-0.292269	-0.287696	-0.0140739	-0.482876	0.259492		not_detected	not_detected	not_detected	not_detected	not_detected	detected		not_detected	not_detected	not_detected	not_detected	not_detected	not_detected	not_detected	not_detected	not_detected	not_detected	not_detected	-0.397825	-0.365042	-0.521453	-0.115574	-0.305787	-0.934388			-0.366304	-0.47187
4e0824f10544ab5	2	negative	0	0	0
2081f4ac7e7ee9b	7	positive	0	0	0	0.694287	0.729532	-0.743526	0.235063	0.595655	-0.636887	0.343725	-0.606644	-0.223767	0.125903	-0.119138	-0.0140739	0.882811	-0.713529																				0.446244		-0.511518				negative	negative
09381cdc7381a27	18	negative	0	0	0																not_detected	not_detected	not_detected	not_detected	not_detected	not_detected		not_detected	detected	not_detected	not_detected	not_detected	not_detected	not_detected	not_detected	not_detected	not_detected	not_detected
8e156e89f090233	15	negative	0	0	0
8130a0b3511bfae	14	negative	0	0	0
0df15378928f94d	10	negative	0	0	0	0.122073	-0.147652	0.311666	-1.11126	-0.144821	0.0624944	-0.95079	-0.640038	-1.14014	-0.0309113	-0.835508	0.486665	-1.5334	-0.271247		not_detected	not_detected	not_detected	not_detected	not_detected	not_detected		not_detected	not_detected	not_detected	not_detected	not_detected	not_detected	not_detected	not_detected	not_detected	detected	not_detected	0.692089		-0.42409
5f24162f2c59f7e	1	negative	0	0	0																																								negative	negative
16282b20c23964c	15	negative	0	0	0
1565192a9150ba4	0	negative	0	0	0																																								negative	negative
ba5d88487c3adf0	16	negative	0	0	0																																								negative	negative
3f3598cd5822fc4	7	negative	0	0	0
510002977710c49	8	negative	0	0	0
416a6fcc7db7691	3	negative	0	0	0
053372a420f625e	2	negative	0	0	0																not_detected	not_detected	detected	not_detected	not_detected	not_detected		not_detected	not_detected	not_detected	not_detected	not_detected	not_detected	not_detected	not_detected	not_detected	not_detected	not_detected
f415ca5b327ac9d	16	negative	0	0	0																not_detected	not_detected	not_detected	not_detected	not_detected	not_detected		not_detected	not_detected	not_detected	not_detected	not_detected	not_detected	not_detected	not_detected	not_detected	not_detected	not_detected
c7d153941c1531b	5	negative	0	0	0																not_detected	not_detected	not_detected	not_detected	not_detected	not_detected		not_detected	not_detected	not_detected	not_detected	not_detected	not_detected	not_detected	not_detected	not_detected	not_detected	not_detected
6b1b07dccbe68bf	8	negative	0	0	0
8093f6c0168c627	8	positive	0	0	0
15125ea5f1b0469	7	negative	0	0	0																not_detected	not_detected	not_detected	not_detected	not_detected	not_detected		not_detected	not_detected	not_detected	not_detected	not_detected	not_detected	not_detected	not_detected	not_detected	not_detected	not_detected							negative	negative
c0638efa4d337a7	11	negative	0	0	0																not_detected	not_detected	not_detected	not_detected	not_detected	not_detected		detected	not_detected	not_detected	not_detected	not_detected	not_detected	not_detected	not_detected	not_detected	not_detected	not_detected
59af7acdbadd2f7	0	negative	0	0	0																																								negative	negative
be0703dfbedad9a	4	positive	0	0	0
8684ccf9e268f69	1	negative	0	0	0
5bc892b8f623630	15	negative	0	0	0																not_detected	not_detected	not_detected	not_detected	not_detected	not_detected		not_detected	not_detected	not_detected	not_detected	not_detected	not_detected	not_detected	not_detected	not_detected	not_detected	not_detected
a692906668e142f	1	negative	0	0	0
185166bb531b89f	10	negative	1	0	0	-0.495919	-0.523588	0.374475	0.683835	-0.814774	-0.43219	-0.253742	0.492559	0.0816925	0.596348	-0.624811	0.807138	-1.61219	0.0825793		not_detected	not_detected	not_detected	not_detected	not_detected	detected		not_detected	not_detected	not_detected	not_detected	not_detected	not_detected	not_detected	not_detected	not_detected	not_detected	not_detected	1.11822	1.94239	-0.521453	0.0222695	0.682859	-0.215628			-0.421433	-0.626705	-0.409223
0ebad5210969852	2	negative	0	0	0																																								negative	negative
ac56d84be2e5b8b	16	negative	0	0	0	0.396736	0.29094	0.763892	-1.22345	-0.0390385	0.753347	-0.253742	0.464731	-0.223767	0.544077	0.555092	0.767079	-0.377823	-0.536617	-0.352639	not_detected	not_detected	not_detected	not_detected	not_detected	detected		not_detected	not_detected	not_detected	not_detected	not_detected	not_detected	not_detected	not_detected	not_detected	not_detected	not_detected	-0.627281	0.230425	-0.521453	-0.218957	0.188535	-1.65315
44dc62db4eca1d1	11	negative	0	0	0																not_detected	not_detected	not_detected	not_detected	not_detected	not_detected		not_detected	not_detected	not_detected	not_detected	not_detected	not_detected	not_detected	not_detected	not_detected	not_detected	not_detected
939635e384a919d	16	negative	0	0	0	-0.0610358	-0.398276	0.839262	-0.774677	-0.0390385	0.949515	-1.3491	0.7124	-1.14014	-0.658171	-0.414114	-0.0941924	-1.00814	0.0825793		not_detected	not_detected	detected	not_detected	not_detected	not_detected		not_detected	not_detected	not_detected	not_detected	not_detected	not_detected	not_detected	detected	not_detected	not_detected	not_detected		0.751459		-0.494645	1.42434	0.143752			0.212554	-0.549287	0.904769
79cdb07b69a30c6	11	negative	0	0	0
1d8032eb1c5ef5d	11	negative	0	0	0																not_detected	not_detected	not_detected	not_detected	not_detected	not_detected		not_detected	not_detected	not_detected	not_detected	not_detected	not_detected	not_detected	not_detected	not_detected	detected	not_detected							negative	negative
7a02fb96aa0400e	5	positive	0	0	0
dba0248a1020e71	15	negative	0	0	0																																								negative	negative
0f574129beebedd	6	negative	0	0	0																not_detected	detected	not_detected	not_detected	not_detected	not_detected		not_detected	not_detected	not_detected	not_detected	not_detected	not_detected	not_detected	not_detected	not_detected	not_detected	not_detected							negative	positive
9bef99aa66c0d37	18	negative	0	0	0
bbc031943952afa	10	positive	0	0	0
1e064c4b8a528ca	10	negative	0	0	0
b36b096bbdc6133	19	negative	0	0	0
5c700ab702aff45	0	negative	0	0	0
dc01fa09b97c27e	17	negative	0	0	0																detected	not_detected	not_detected	not_detected	not_detected	not_detected		not_detected	not_detected	not_detected	not_detected	not_detected	not_detected	not_detected	not_detected	not_detected	not_detected	not_detected
71158b611902742	8	negative	0	0	0
3314ea5ac291c05	12	negative	0	0	0																																								negative	negative
3f6fe3bfd9bf4f9	7	negative	0	0	0																not_detected	not_detected	not_detected	not_detected	not_detected	not_detected		detected	not_detected	not_detected	not_detected	not_detected	not_detected	not_detected	not_detected	not_detected	not_detected	not_detected							negative	negative
70dc48fbdb7cd72	5	negative	0	0	0
cd84ce75a42fc44	15	negative	0	0	0																not_detected	not_detected	not_detected	not_detected	not_detected	detected		not_detected	not_detected	not_detected	not_detected	not_detected	not_detected	not_detected	not_detected	not_detected	not_detected	not_detected
e6f46ef47258101	4	negative	0	0	0	-0.244145	0.040316	0.248857	0.235063	-0.144821	0.224546	1.14035	0.0667916	-0.529226	0.282719	-0.119138	-0.214369	-0.0889278	-0.0943343	-0.685769	not_detected	not_detected	not_detected	not_detected	not_detected	not_detected		not_detected	not_detected	not_detected	not_detected	not_detected	not_detected	not_detected	not_detected	not_detected	not_detected	not_detected	-0.0700317	0.081558	-0.535362	-1.11494	-0.80011	0.143752
6385daf6d274a67	4	positive	0	0	0
be8bc7559c590ca	4	negative	0	0	0
9711b537a6d96eb	4	negative	0	0	0																not_detected	not_detected	not_detected	not_detected	not_detected	detected		not_detected	not_detected	not_detected	not_detected	not_detected	not_detected	not_detected	not_detected	not_detected	not_detected	not_detected
dc6b22b30b9cfb8	5	negative	0	0	0																not_detected	not_detected	not_detected	not_detected	not_detected	not_detected		not_detected	not_detected	not_detected	not_detected	not_detected	not_detected	not_detected	not_detected	not_detected	not_detected	not_detected							negative	negative
b13f3461f41ce74	1	negative	0	0	0																not_detected	not_detected	not_detected	not_detected	not_detected	not_detected		not_detected	not_detected	not_detected	not_detected	not_detected	not_detected	not_detected	not_detected	not_detected	not_detected	not_detected							negative	negative
28ac34c570f43c8	4	negative	0	0	0
aad9e83f862456a	9	negative	0	0	0
618f87b949a2d62	13	negative	0	0	0
95bb11bb549cad6	14	negative	0	0	0	0.236515	0.541564	0.701083	-1.11126	0.40172	2.14358	1.23993	-0.219836	-1.14014	0.178175	0.428674	-0.434694	-1.5334	-0.271247	-0.473777	not_detected	not_detected	not_detected	not_detected	not_detected	not_detected		not_detected	not_detected	not_detected	not_detected	not_detected	not_detected	not_detected	not_detected	not_detected	not_detected	not_detected		0.230425	-0.521453	0.608106	-0.80011	0.503132
6e2b933a9d9af84	6	positive	0	0	0																not_detected	not_detected	not_detected	not_detected	not_detected	not_detected		not_detected	not_detected	not_detected	not_detected	not_detected	not_detected	not_detected	not_detected	not_detected	not_detected	not_detected							negative	negative
8b0ca649f6ec0a7	10	negative	0	0	0
15da87c8d757205	2	negative	0	0	0																																								negative	negative
098d16b92ae4a7b	16	negative	0	0	0																not_detected	not_detected	not_detected	not_detected	not_detected	detected		not_detected	not_detected	not_detected	not_detected	not_detected	not_detected	not_detected	not_detected	not_detected	not_detected	not_detected
b0725b8e70add6b	16	negative	0	0	0
509148a70a4a64c	2	negative	0	0	0
b545603c6685fcc	5	negative	0	0	0
ac9e48163b802c5	3	negative	0	0	0																not_detected	not_detected	not_detected	not_detected	not_detected	detected		not_detected	not_detected	not_detected	not_detected	not_detected	not_detected	not_detected	not_detected	not_detected	not_detected	not_detected
20d3df7d5f10864	5	negative	0	0	0
a8d496a34af222e	11	negative	0	0	0
f662eb7131c245d	5	negative	0	0	0																not_detected	detected	not_detected	not_detected	not_detected	not_detected		not_detected	not_detected	not_detected	not_detected	not_detected	not_detected	not_detected	not_detected	not_detected	not_detected	not_detected
ff14a0f039bd43a	4	negative	0	0	0																not_detected	not_detected	not_detected	not_detected	not_detected	detected		not_detected	not_detected	not_detected	not_detected	not_detected	not_detected	not_detected	not_detected	not_detected	not_detected	not_detected							negative	negative
8ba07b2a88fcf9d	7	negative	0	0	0
56a6c9c70f4ce43	5	negative	0	0	0																not_detected	not_detected	not_detected	not_detected	not_detected	not_detected		not_detected	not_detected	not_detected	not_detected	not_detected	not_detected	not_detected	not_detected	not_detected	not_detected	not_detected							negative	negative
1d787ac8d416721	4	negative	0	0	0
2b2ee95271c890d	0	negative	0	0	0																not_detected	not_detected	not_detected	not_detected	not_detected	detected		not_detected	not_detected	not_detected	not_detected	not_detected	not_detected	not_detected	not_detected	not_detected	not_detected	not_detected
1e3fb1e0eeaf08f	4	negative	0	0	0
0872959b3e69e40	4	negative	0	0	0
954af44b54a4b7b	3	negative	0	0	0
404fdcc8eaf9544	5	negative	0	0	0
c669452253b8699	18	negative	0	0	0																not_detected	not_detected	not_detected	not_detected	not_detected	detected		not_detected	not_detected	not_detected	not_detected	not_detected	not_detected	not_detected	not_detected	not_detected	not_detected	not_detected							negative	negative
e00ef039cdb2b3e	7	positive	0	0	0
e10bc6ec4143043	18	negative	0	0	0
43f173cc25847f2	8	negative	0	0	0																not_detected	not_detected	not_detected	not_detected	not_detected	detected		not_detected	not_detected	not_detected	not_detected	not_detected	not_detected	not_detected	not_detected	not_detected	not_detected	not_detected
3f579cf40a8de13	10	negative	0	0	0
580f010571593a0	10	negative	0	0	0
88ab356efe33df0	0	negative	0	0	0																not_detected	not_detected	not_detected	not_detected	not_detected	not_detected		not_detected	detected	not_detected	not_detected	not_detected	not_detected	not_detected	not_detected	not_detected	not_detected	not_detected
3ad1f2395ca2a07	13	negative	0	0	0
0f96af6372a9190	3	negative	0	0	0
b982cd8e56e8348	3	negative	0	0	0
1c21c4b01297c18	1	negative	0	0	0																not_detected	not_detected	not_detected	not_detected	not_detected	detected		not_detected	not_detected	not_detected	not_detected	not_detected	not_detected	not_detected	not_detected	not_detected	not_detected	not_detected							negative	negative
6f5f4c849f37cb8	16	negative	0	0	0
2269b14b949d34e	7	negative	0	0	0
d57ef6a309f5bf3	4	negative	0	0	0																not_detected	not_detected	not_detected	not_detected	not_detected	not_detected		not_detected	not_detected	not_detected	not_detected	not_detected	not_detected	not_detected	not_detected	not_detected	not_detected	not_detected
2cdfc4eaf23a81f	2	negative	0	0	0	0.877395	0.980156	0.286543	-0.438097	1.12456	-0.00573804	0.542882	0.116882	0.692611	-0.344541	3.71555	-0.67505	-0.35156	-0.18279		not_detected	not_detected	not_detected	not_detected	not_detected	detected		not_detected	not_detected	not_detected	not_detected	not_detected	not_detected	not_detected	not_detected	not_detected	not_detected	not_detected	-0.545333		-0.521453				negative	negative
e91eeb27adfea76	1	negative	0	0	0	-0.175479	-0.0849959	1.05281	0.571643	0.207786	0.318366	0.343725	-0.865444	0.0816925	-0.553627	-0.414114	-0.795227	0.804021	-0.978899	-1.04918	not_detected	not_detected	detected	not_detected	not_detected	not_detected		not_detected	not_detected	not_detected	not_detected	not_detected	not_detected	not_detected	not_detected	not_detected	not_detected	not_detected	-0.430605	0.602592		-1.39063					-0.393869	0.0313438	-0.409223
c2c38777182e7ec	15	negative	0	0	0
ec048c48934040b	15	negative	0	0	0
8679abadcec4ec8	1	negative	0	0	0
a78a062f71face5	4	positive	0	0	0
1022308286ce848	10	negative	0	0	0	-0.106813	0.165628	0.512655	1.13261	-0.285863	0.198959	1.04077	-0.556554	0.99807	0.805435	2.74634	0.366488	-0.692982	-0.625073																				-0.471579	0.081558	-0.533375	-0.873716	1.17718	0.503132			-0.531692	-0.433161
a1d311d4100e41a	4	negative	0	0	0
b3dfdad01da5e2a	2	negative	0	0	0																not_detected	not_detected	detected	not_detected	not_detected	detected		not_detected	not_detected	not_detected	not_detected	not_detected	not_detected	not_detected	not_detected	not_detected	not_detected	not_detected							negative	negative
65b3df5f09ce2c3	1	negative	0	0	0
da65b9c2e6429c8	10	negative	0	0	0																not_detected	not_detected	not_detected	not_detected	not_detected	detected		not_detected	not_detected	not_detected	not_detected	not_detected	not_detected	not_detected	not_detected	not_detected	not_detected	not_detected
44c16f1e79380b4	8	positive	0	0	0																not_detected	not_detected	not_detected	not_detected	not_detected	not_detected		not_detected	not_detected	not_detected	not_detected	not_detected	not_detected	not_detected	not_detected	not_detected	not_detected	not_detected
1e0eaf4fd85f597	6	positive	0	0	0
f5d48453c8a9fcd	11	negative	0	0	0
a71585506facf31	12	negative	0	0	0
908d1c91cc8175d	0	negative	0	0	0																not_detected	not_detected	detected	not_detected	not_detected	not_detected		not_detected	not_detected	not_detected	not_detected	not_detected	not_detected	not_detected	not_detected	not_detected	not_detected	not_detected							negative	negative
c72070be87af31e	6	negative	0	0	0
2979334b77f646e	14	negative	0	0	0
14acdd505a4d3e4	5	positive	0	0	0																not_detected	not_detected	detected	not_detected	not_detected	not_detected		not_detected	not_detected	not_detected	not_detected	not_detected	not_detected	not_detected	not_detected	not_detected	not_detected	not_detected
ba01ab431719441	12	negative	0	0	0																not_detected	not_detected	not_detected	not_detected	not_detected	not_detected		not_detected	not_detected	not_detected	not_detected	not_detected	not_detected	not_detected	not_detected	not_detected	not_detected	not_detected
b95a9882a41e85d	8	negative	0	0	0																not_detected	not_detected	not_detected	not_detected	not_detected	detected		not_detected	not_detected	not_detected	not_detected	not_detected	not_detected	not_detected	not_detected	not_detected	not_detected	not_detected
07f02f4bc7d8d92	9	negative	0	0	0																not_detected	not_detected	detected	not_detected	not_detected	not_detected		not_detected	not_detected	not_detected	not_detected	not_detected	not_detected	not_detected	not_detected	not_detected	not_detected	not_detected
bd3019ab6fae2f1	6	positive	0	0	0
00e881b1391a3ce	6	negative	0	0	0
66af003805be0c5	5	negative	0	0	0																not_detected	not_detected	not_detected	not_detected	not_detected	not_detected		not_detected	not_detected	not_detected	not_detected	not_detected	not_detected	not_detected	not_detected	not_detected	not_detected	not_detected
15d820fb0f3634d	17	negative	0	0	0
55bc793ece6ff92	3	negative	0	0	0
515c0b3170c2ba2	6	negative	0	0	0
378faac153f6940	17	negative	0	0	0
a34d12251a0e800	11	negative	0	0	0
9f2f24a83ded8d4	1	negative	0	0	0																detected	not_detected	not_detected	not_detected	not_detected	not_detected		not_detected	not_detected	not_detected	not_detected	not_detected	not_detected	not_detected	not_detected	not_detected	not_detected	not_detected
f6945bd9ee7dbb7	9	negative	0	0	0
be42796298d3cc4	15	negative	0	0	0
d9a28644c7c806d	3	negative	0	0	0	1.01473	1.04281	-1.20831	0.796029	1.00115	-0.52601	0.343725	-1.30234	-0.223767	-0.0831831	-0.456253	-0.234399	0.515126	0.0825793		not_detected	not_detected	detected	not_detected	not_detected	detected		not_detected	not_detected	not_detected	not_detected	not_detected	not_detected	not_detected	not_detected	not_detected	not_detected	not_detected	0.446244	0.602592	-0.4837	0.435801	0.188535	-0.934388			0.460636	1.96678	-0.162148
b5cb626b12df246	18	positive	0	0	0
8a8f3a826348268	11	negative	0	0	0																not_detected	not_detected	not_detected	not_detected	not_detected	not_detected		not_detected	not_detected	not_detected	not_detected	not_detected	not_detected	not_detected	not_detected	not_detected	not_detected	not_detected
549bddb85e59747	4	negative	0	0	0
3f7a7146dfd9ee0	7	negative	0	0	0
5b5ba7737c155cc	2	negative	0	0	0
66be25d2f41dee7	14	negative	0	0	0																not_detected	not_detected	not_detected	not_detected	not_detected	not_detected		not_detected	not_detected	not_detected	not_detected	not_detected	not_detected	not_detected	not_detected	not_detected	not_detected	not_detected							negative	negative
db99366f519c84e	11	negative	0	0	0
f5c1fa2864a0020	6	positive	0	0	0																not_detected	not_detected	not_detected	not_detected	not_detected	not_detected		not_detected	not_detected	not_detected	not_detected	not_detected	not_detected	not_detected	not_detected	not_detected	not_detected	not_detected
44efc52fc9d46f5	19	negative	0	0	0																																								negative	negative
fc2ceb9927a18f1	10	negative	0	0	0
2cbb168d2cf9aca	11	negative	0	0	0																not_detected	not_detected	not_detected	not_detected	not_detected	not_detected		not_detected	not_detected	not_detected	not_detected	not_detected	not_detected	not_detected	not_detected	not_detected	not_detected	not_detected							negative	negative
df7d9df67220d61	4	negative	0	0	0																not_detected	not_detected	not_detected	not_detected	not_detected	not_detected		not_detected	not_detected	not_detected	not_detected	not_detected	not_detected	not_detected	not_detected	not_detected	not_detected	not_detected
5c2a444374ac409	6	positive	0	0	0																not_detected	not_detected	not_detected	not_detected	not_detected	not_detected		not_detected	not_detected	not_detected	not_detected	not_detected	not_detected	not_detected	not_detected	not_detected	not_detected	not_detected
ec32df0cf7b1e5b	11	negative	0	0	0																																								negative	negative
0f2cd7e642eab2d	2	negative	0	0	0
7b0e4462ae88a50	5	positive	0	0	0
d4a33447d966127	11	positive	0	0	0
7c1a9740f98315e	16	negative	0	0	0
5d69b091bd54604	5	negative	0	0	0
bc933f2bf0d7539	11	negative	0	0	0																not_detected	not_detected	not_detected	not_detected	not_detected	detected		not_detected	not_detected	not_detected	not_detected	not_detected	not_detected	not_detected	not_detected	not_detected	not_detected	not_detected
2232121c5da3b99	14	negative	0	0	0
b51a8e78c52ea33	7	negative	0	0	0
74d5887d0ceed4c	17	negative	0	0	0
64f5f4b544e555d	16	negative	0	0	0	-0.335699	-0.147652	1.45479	0.235063	-0.444537	0.889812	0.642463	-0.690128	1.60899	0.544077	-0.371974	0.26634	0.199968	-0.536617		not_detected	not_detected	not_detected	not_detected	not_detected	not_detected		not_detected	not_detected	not_detected	not_detected	not_detected	not_detected	not_detected	not_detected	not_detected	not_detected	not_detected	-0.823957		-0.535362
b12736e775f1f75	18	negative	0	0	0																not_detected	not_detected	not_detected	not_detected	not_detected	not_detected		not_detected	not_detected	not_detected	not_detected	not_detected	not_detected	not_detected	not_detected	not_detected	not_detected	not_detected
1e0b3f583af4701	14	negative	0	0	0																not_detected	not_detected	not_detected	not_detected	not_detected	not_detected		not_detected	not_detected	not_detected	not_detected	not_detected	not_detected	not_detected	not_detected	not_detected	not_detected	not_detected
7be14fb4f79c9d8	4	positive	0	0	0
d9dc22f2add5181	9	negative	0	0	0
94c261bddc26e1b	2	negative	0	0	0																																								negative	negative
edc12fac05009cc	11	negative	0	0	0																not_detected	not_detected	not_detected	not_detected	not_detected	not_detected		not_detected	not_detected	not_detected	not_detected	not_detected	not_detected	not_detected	detected	not_detected	not_detected	not_detected
4848e304f38f527	0	negative	0	0	0																not_detected	not_detected	detected	not_detected	not_detected	not_detected		not_detected	not_detected	not_detected	not_detected	not_detected	not_detected	not_detected	not_detected	not_detected	not_detected	not_detected
1bf538bb3a03a2e	2	negative	0	0	0
48480d4ea5bdec8	4	negative	0	0	0																not_detected	not_detected	not_detected	not_detected	not_detected	detected		not_detected	not_detected	not_detected	not_detected	not_detected	not_detected	not_detected	not_detected	not_detected	not_detected	not_detected
df699ab27e3eb96	2	negative	0	0	0																not_detected	not_detected	not_detected	not_detected	not_detected	not_detected		not_detected	not_detected	not_detected	not_detected	not_detected	not_detected	not_detected	detected	not_detected	not_detected	not_detected							negative	negative
75bc1381844c9ad	5	negative	0	0	0																																								negative	negative
cd44e3032b8a5be	6	positive	0	0	0
db697bdb1fd38e1	8	negative	0	0	0
588a6aa03deee08	6	negative	0	0	0
81e2478bdff175d	10	negative	0	0	0
d92844bdc561ce5	12	negative	0	0	0																not_detected	not_detected	not_detected	not_detected	not_detected	not_detected		not_detected	not_detected	not_detected	not_detected	not_detected	not_detected	not_detected	not_detected	not_detected	not_detected	not_detected
402e3db33eadd0a	18	negative	0	0	0
08e7acdc4860ecf	8	negative	0	0	0
2ce396d7e6886bb	6	negative	0	0	0
83aa74c4c0674c1	12	negative	0	0	0
205c84d73a75267	0	positive	0	0	0																																								negative	negative
cf43372f03dec9d	5	positive	0	0	0
8d379b563804ef7	4	negative	0	0	0
ae1bc054e98db05	2	negative	0	0	0																																								negative	negative
81580945fbfcc98	19	negative	0	0	0
5b3e49a5e5f9ab3	10	negative	0	0	0
19b06c005084a5f	9	negative	0	0	0
2be1930c8e49989	10	negative	0	0	0																																								negative	negative
ecd3203a3d14f9b	0	negative	0	0	1																detected	not_detected	not_detected	not_detected	not_detected	not_detected		not_detected	not_detected	not_detected	not_detected	not_detected	not_detected	not_detected	not_detected	not_detected	not_detected	not_detected							negative	negative
ee963c226b554a9	9	negative	0	0	0
804cbf88e1b8333	18	negative	0	0	0																not_detected	not_detected	not_detected	not_detected	not_detected	not_detected		not_detected	not_detected	not_detected	not_detected	not_detected	not_detected	not_detected	not_detected	not_detected	not_detected	not_detected
ffcb97558f37256	15	negative	0	0	0																not_detected	not_detected	not_detected	not_detected	not_detected	not_detected		not_detected	not_detected	not_detected	not_detected	not_detected	not_detected	not_detected	not_detected	not_detected	not_detected	not_detected
9275d552038ca56	19	negative	0	0	0
7fd98412220cba0	15	negative	0	0	0
b4349602cb337c1	6	negative	0	0	0
f5fb75e4dc57c38	6	negative	0	0	0
4c79d9ace2a9744	4	positive	0	0	0
9b9e2b8453142ae	15	negative	0	0	0																not_detected	not_detected	not_detected	not_detected	not_detected	not_detected		not_detected	not_detected	not_detected	not_detected	not_detected	not_detected	not_detected	not_detected	not_detected	not_detected	not_detected
f205876dc8bc5bc	5	negative	0	0	0
5ae6bde2a650eca	3	positive	0	0	0																																								negative	negative
5015ee44a09eea6	17	negative	0	0	0
bc7ed7083199427	5	negative	0	0	0
edff065908dac3f	0	negative	0	0	0																																								negative	negative
ee12c6b09717571	15	negative	0	0	0
8d62a8579cb6537	17	negative	0	0	0
b5288c49478caba	4	negative	0	0	0
93b57fab7a833ed	5	negative	0	0	0
ee2f3aa68b4e21c	4	positive	0	0	0																not_detected	not_detected	not_detected	not_detected	not_detected	not_detected		not_detected	not_detected	not_detected	not_detected	not_detected	not_detected	not_detected	not_detected	not_detected	not_detected	not_detected
ccd40e7f1547566	7	negative	0	0	0																not_detected	not_detected	not_detected	not_detected	not_detected	not_detected		not_detected	not_detected	not_detected	not_detected	not_detected	not_detected	not_detected	not_detected	not_detected	not_detected	not_detected
951226477dede62	9	positive	0	0	0
0e97b3393eb34dd	6	negative	0	0	0
f572e61c020a8f2	10	negative	0	0	0
41e65d385ab390a	6	negative	0	0	0
37f3f5e8a503200	2	negative	0	0	0
d168af23957bd46	5	positive	0	0	0	-0.0152594	-0.147652	-1.00732	0.908221	-0.550319	1.61478	-0.552476	-1.33574	-0.223767	0.753163	0.470813	1.14764	0.725232	0.613318		not_detected	not_detected	not_detected	not_detected	not_detected	not_detected		not_detected	not_detected	not_detected	not_detected	not_detected	not_detected	not_detected	not_detected	not_detected	not_detected	not_detected	-1.78275	-0.886076	-0.521453	-0.460184	-0.305787	0.143752
b7cf84fd3ce95d5	12	negative	0	0	0																not_detected	not_detected	not_detected	not_detected	not_detected	not_detected		not_detected	not_detected	not_detected	not_detected	not_detected	not_detected	not_detected	detected	not_detected	not_detected	not_detected
23f9f29d0ac4446	7	negative	0	0	0
9ea127cd5594081	13	negative	0	0	0
4ad6c2f7e140be2	11	negative	0	0	0
a13a86e029071de	5	negative	0	0	0
05a7363e0ba113c	3	negative	0	0	0																not_detected	not_detected	not_detected	not_detected	not_detected	not_detected		not_detected	not_detected	not_detected	not_detected	not_detected	not_detected	not_detected	not_detected	not_detected	not_detected	not_detected							negative	negative
efd4516c3c064e0	2	negative	0	0	0
7bb104d84ec4553	4	negative	0	0	0
579106d3210c848	8	negative	0	0	0																not_detected	not_detected	not_detected	not_detected	detected	detected		not_detected	not_detected	not_detected	not_detected	not_detected	not_detected	not_detected	not_detected	not_detected	not_detected	not_detected
7bb7e55bc0faf4e	4	negative	0	0	0
46644b21972d695	9	negative	0	0	0
e5b3a6cf2fa9a66	11	negative	0	0	0
5c621bec2abb42f	15	negative	0	0	0
7f941597f5477e9	19	negative	0	0	0
91cb17eeff042e7	0	negative	0	0	0
064fbc161096933	15	negative	0	0	0
15be109350fd983	15	negative	0	0	0																																								negative	negative
ef0a6ba0eca32d3	6	negative	0	0	0
45d3c65cf74b53f	18	negative	0	0	0
cde3fe111ddb57c	18	negative	0	0	0
bade842b0f36280	3	negative	0	0	0
bb97708f7354c14	5	positive	0	0	0																not_detected	not_detected	not_detected	not_detected	not_detected	not_detected		not_detected	not_detected	not_detected	not_detected	not_detected	not_detected	not_detected	not_detected	not_detected	not_detected	not_detected
bbc3e95acbb64d6	4	positive	0	0	0																																								negative	negative
af59bd0a88fb418	14	negative	0	0	0
6dc96b87a66b18a	13	negative	0	0	0
c47d16642ad5964	19	negative	0	0	0																not_detected	not_detected	not_detected	not_detected	not_detected	detected		not_detected	not_detected	not_detected	not_detected	not_detected	not_detected	not_detected	not_detected	not_detected	not_detected	not_detected
e1c2d2d0b68cb56	17	negative	0	0	0
2d6ced18ba348fb	5	negative	0	0	0																not_detected	not_detected	not_detected	not_detected	not_detected	not_detected		not_detected	not_detected	not_detected	not_detected	not_detected	not_detected	not_detected	not_detected	not_detected	not_detected	not_detected
5df362094fbd848	11	negative	0	0	0
1c824d611f90bdf	3	negative	0	0	0
c557f343a964e3e	3	negative	0	0	0
108f0a48d3f6afd	9	negative	0	0	0																not_detected	not_detected	not_detected	not_detected	not_detected	not_detected		not_detected	not_detected	not_detected	not_detected	not_detected	not_detected	not_detected	not_detected	not_detected	not_detected	not_detected
675d85e7a5f1623	15	negative	0	0	0
bd5eb966af9bdbc	16	negative	0	0	0																not_detected	not_detected	not_detected	not_detected	not_detected	not_detected		not_detected	not_detected	not_detected	not_detected	not_detected	not_detected	not_detected	not_detected	not_detected	not_detected	not_detected
e64f0b667f7a543	6	negative	0	0	0
a665e33ec22b37d	5	positive	1	0	0
72c34cee0c51a68	17	negative	1	0	0	1.63272	1.10547	-0.278739	-0.55029	0.948261	-0.517481	-1.44868	-0.269926	1.60899	0.125903	0.302256	0.887256	0.698968	-0.890442		not_detected	not_detected	not_detected	not_detected	not_detected	detected		not_detected	not_detected	not_detected	not_detected	not_detected	not_detected	not_detected	not_detected	not_detected	not_detected	not_detected	0.257762	0.230425	-0.380375	0.366879
1fa2682f9006f13	1	negative	0	0	0
2e254f0b59bbec9	5	positive	0	0	0
a53ed3fa891951c	17	negative	0	0	0
d77847926e6922a	6	negative	0	0	0
337e143c740621d	11	positive	0	0	0																																								negative	negative
78d1f0275eec885	14	negative	0	0	0
16ff965b4b1f92e	5	negative	0	0	0
41855b71fb35ba5	9	positive	0	0	0																not_detected	not_detected	not_detected	not_detected	not_detected	not_detected		not_detected	not_detected	not_detected	not_detected	not_detected	not_detected	not_detected	not_detected	not_detected	not_detected	not_detected
c7cca6aabdb02df	4	negative	0	0	0																not_detected	not_detected	not_detected	not_detected	not_detected	detected		not_detected	not_detected	not_detected	not_detected	not_detected	not_detected	not_detected	not_detected	not_detected	not_detected	not_detected
f9d6ad3b4e4b8d7	6	negative	0	0	0																not_detected	not_detected	not_detected	not_detected	not_detected	not_detected		not_detected	not_detected	not_detected	not_detected	not_detected	not_detected	not_detected	not_detected	not_detected	not_detected	not_detected
a77e9e38a07a83e	5	negative	0	0	0																not_detected	not_detected	not_detected	not_detected	not_detected	not_detected		not_detected	not_detected	not_detected	not_detected	not_detected	not_detected	not_detected	not_detected	not_detected	not_detected	not_detected
0d577c9065a196e	17	negative	0	0	0
1cc0a7c40b92d9a	11	negative	0	0	0
217ef590ca230a4	3	negative	0	0	0
a21b6c52159a8bf	1	negative	0	0	0
29c5aedf109234d	2	negative	0	0	0																not_detected	not_detected	not_detected	not_detected	not_detected	detected		not_detected	not_detected	not_detected	not_detected	not_detected	not_detected	not_detected	not_detected	not_detected	not_detected	not_detected							negative	negative
9a9ed97e0d6eca3	4	positive	0	0	0																not_detected	not_detected	not_detected	not_detected	not_detected	not_detected		not_detected	not_detected	not_detected	not_detected	not_detected	not_detected	not_detected	not_detected	not_detected	not_detected	not_detected
af3f6a413d15e30	14	negative	0	0	0
164fa1dfe0c18f7	19	negative	0	0	0
2bee18249b7148d	9	negative	0	0	0
c391862a245381e	18	negative	0	0	0																not_detected	not_detected	not_detected	not_detected	not_detected	not_detected		not_detected	not_detected	not_detected	not_detected	not_detected	not_detected	not_detected	detected	not_detected	not_detected	not_detected
09c71f1846327fd	0	negative	0	0	0
89d50037367a565	2	negative	0	0	0
5aac8b3961b4d93	11	negative	0	0	0
5248e69303d6275	14	negative	0	0	0
6ede661b9b95c16	13	negative	0	0	0	-0.0152594	0.729532	0.500094	0.347255	-0.250603	-1.48126	2.93276	0.773621	-0.529226	1.74632	-0.793368	0.446606	-2.16372	-1.06736		not_detected	not_detected	not_detected	not_detected	not_detected	not_detected		not_detected	not_detected	not_detected	not_detected	not_detected	not_detected	not_detected	not_detected	not_detected	not_detected	not_detected	2.29828	0.304858	0.0229881	0.539184
8cc63c559fa013f	10	negative	0	0	0
c4b17a271a771fb	6	negative	0	0	0
86f7624aa609b88	4	negative	0	0	0	0.877395	0.980156	-0.0149406	1.80577	0.842479	0.778934	0.542882	-0.581599	1.30353	0.125903	3.92624	-0.174311	-0.0626645	-0.978899		not_detected	not_detected	not_detected	not_detected	not_detected	not_detected		not_detected	not_detected	not_detected	not_detected	not_detected	not_detected	not_detected	not_detected	not_detected	not_detected	not_detected	-1.46316	1.42136	-0.52344	0.504723	1.17718	0.862512			-0.256045	-0.394452	-0.240763
ab05d21b087ca5c	3	negative	0	0	0
90edc503f144b9f	13	negative	0	0	0	0.740064	0.60422	-0.0400642	-0.325903	0.89537	0.804521	-0.353319	-0.985104	1.60899	-0.605899	0.470813	-0.494784	-0.377823	0.171035	0.52561	not_detected	not_detected	not_detected	not_detected	not_detected	not_detected		not_detected	not_detected	not_detected	not_detected	not_detected	not_detected	not_detected	not_detected	not_detected	not_detected	not_detected	-0.70923	0.230425	0.154131	-0.563567	-0.552949	0.503132
f0b8203d54aa5e7	5	negative	0	0	0																not_detected	not_detected	detected	not_detected	not_detected	detected		not_detected	not_detected	not_detected	not_detected	not_detected	not_detected	not_detected	not_detected	not_detected	not_detected	not_detected
2e63ed360039005	7	negative	0	0	0
f2503169046768b	1	negative	0	0	0
27f62aed65c7138	9	positive	0	0	0
c4fc97381554044	14	negative	0	0	0
ad0eddaecd4f2c7	3	negative	0	0	0
4be5573a4fe284d	13	negative	0	0	0																not_detected	not_detected	not_detected	not_detected	not_detected	detected		not_detected	not_detected	not_detected	not_detected	not_detected	not_detected	not_detected	not_detected	not_detected	not_detected	not_detected
90585bd39b1cf52	19	negative	0	0	0
003ebccd5d5bfdd	18	negative	0	0	0
b1227a0b3fcecba	16	negative	0	0	0
84a82d28b98bd4e	11	negative	0	0	0
1ba16f8aaa810c5	12	positive	0	0	0																																								negative	negative
16ad5520abe0f2e	3	negative	0	0	0
999768e45ea3e92	15	positive	0	0	0
5ea443e2ac871d0	8	positive	1	0	0																not_detected	not_detected	not_detected	not_detected	not_detected	not_detected		not_detected	not_detected	not_detected	not_detected	not_detected	not_detected	not_detected	not_detected	not_detected	not_detected	not_detected
d257db0c9937a6b	0	negative	0	0	0																not_detected	not_detected	not_detected	not_detected	not_detected	not_detected		not_detected	not_detected	not_detected	not_detected	not_detected	not_detected	not_detected	not_detected	not_detected	detected	not_detected
a07e61327425e78	16	negative	0	0	0
e8518d391e94d4f	4	negative	0	0	0
d0d3e16b1b70dfb	14	negative	0	0	0																not_detected	not_detected	not_detected	not_detected	not_detected	not_detected		detected	not_detected	not_detected	not_detected	not_detected	not_detected	not_detected	not_detected	not_detected	not_detected	not_detected
f1d79fda58a64e2	13	negative	0	0	0	0.534067	0.29094	-0.542537	1.58138	0.719067	0.54865	-0.751633	-0.395152	0.692611	-0.814985	0.68151	-0.514813	0.38381	1.14406		not_detected	not_detected	not_detected	not_detected	not_detected	not_detected		not_detected	not_detected	not_detected	not_detected	not_detected	not_detected	not_detected	not_detected	not_detected	not_detected	not_detected	-0.717424	0.230425	-0.521453	1.53855	0.188535	0.862512			-0.0906571	-0.200909
a91ea24912caf36	2	negative	0	0	0																not_detected	not_detected	not_detected	not_detected	detected	not_detected		not_detected	not_detected	not_detected	not_detected	not_detected	not_detected	not_detected	not_detected	not_detected	not_detected	not_detected
9f79f52a8922d1e	17	negative	0	0	0																not_detected	not_detected	not_detected	not_detected	not_detected	not_detected		not_detected	not_detected	not_detected	not_detected	not_detected	not_detected	not_detected	not_detected	not_detected	not_detected	not_detected
033115383d5ae15	16	negative	0	0	0																not_detected	not_detected	not_detected	not_detected	not_detected	not_detected		not_detected	not_detected	not_detected	not_detected	not_detected	not_detected	not_detected	not_detected	not_detected	not_detected	not_detected
938004044cac19f	6	positive	0	0	0
77fcc70ea1e5110	7	negative	0	0	0
028bcbb5226b1b7	5	negative	0	0	0
a928ca06b848545	16	negative	0	0	0
907c5dc6039b01e	1	negative	0	0	0
09053f9066cd14e	19	negative	0	0	0
d2cbd0bd0ca2776	10	negative	0	0	0
4566d99767604c8	8	negative	0	0	0
0d18eb934122c47	8	negative	0	0	0
26c00070ab66909	15	negative	0	0	0																not_detected	not_detected	not_detected	not_detected	not_detected	not_detected		not_detected	not_detected	not_detected	not_detected	not_detected	not_detected	not_detected	not_detected	not_detected	not_detected	not_detected
336c98ed0e39bc4	11	negative	0	0	0
2be3d6b9a5ae514	6	negative	0	0	0
458340bf5b04144	4	negative	0	0	0
c9f6649b05f4646	19	negative	0	0	0
58e44dd1f78123a	4	negative	0	0	0
df1d3202738ba85	15	negative	0	0	0																not_detected	not_detected	not_detected	not_detected	not_detected	not_detected		not_detected	not_detected	not_detected	not_detected	not_detected	not_detected	not_detected	not_detected	not_detected	not_detected	not_detected
0410430a1cffc57	17	negative	0	0	0	0.831618	0.854844	0.223734	0.796029	0.489872	1.69154	0.244149	-0.325582	-0.223767	0.544077	-0.203417	0.446606	0.0161249	0.436405		not_detected	not_detected	not_detected	not_detected	not_detected	not_detected		not_detected	not_detected	not_detected	not_detected	not_detected	not_detected	not_detected	not_detected	not_detected	not_detected	not_detected	-1.50413		-0.338648
484d8a9c71f01d2	1	negative	0	0	0
c100bb0061cc140	19	negative	1	0	0	-0.289922	0.165628	-0.542537	0.0106766	-0.197712	-0.372487	1.73782	-0.322799	0.692611	0.648619	0.00727989	-0.174311	0.777758	-0.890442	0.495326	not_detected	not_detected	not_detected	not_detected	not_detected	detected		not_detected	not_detected	not_detected	not_detected	not_detected	not_detected	not_detected	not_detected	not_detected	not_detected	not_detected	0.175814	0.900325	-0.515492	0.608106	0.682859	1.22189
d6f2ddd54176cc5	1	negative	0	0	0																not_detected	not_detected	not_detected	not_detected	not_detected	detected		not_detected	not_detected	not_detected	not_detected	not_detected	not_detected	not_detected	not_detected	not_detected	not_detected	not_detected
b2bdf7b90c7bfe5	16	negative	0	0	0
c46a72e104630b4	2	negative	0	0	0																not_detected	not_detected	not_detected	not_detected	not_detected	not_detected		not_detected	not_detected	not_detected	not_detected	not_detected	not_detected	not_detected	not_detected	not_detected	not_detected	not_detected
683c7f5f8f43ae9	12	negative	0	0	0
ee67374d09aa864	3	negative	0	0	0
fc178d125663127	6	negative	0	0	0	-0.953691	-0.836868	0.148363	-0.213711	-1.29079	-0.261609	0.244149	-0.414631	-0.529226	1.06679	-0.70909	1.02746	-0.535402	-0.271247	-0.928044																			0.634725	-0.662776		-0.356801					-0.531692	-0.394452	-0.319378
ca12442ea41b710	9	negative	0	0	0
28ecd0a46c2086c	7	negative	0	0	0
370315ed3557d9b	11	negative	0	0	0
29e3804bf14da25	14	negative	0	0	0
0b2de54a459532b	5	positive	0	0	0	1.35805	1.23078	-0.605346	0.571643	0.965892	-1.18275	-0.154166	-0.651169	-1.14014	0.282719	-0.835508	0.406546	-0.745508	-0.271247																						-0.279038				negative	negative
9f498948daa2eca	8	negative	0	0	0
ec9a78433c38d4d	13	negative	0	0	0
ef7f3e89f50341b	19	negative	0	0	0
43df57e088ed95b	13	negative	0	0	0																not_detected	not_detected	not_detected	not_detected	not_detected	not_detected		not_detected	not_detected	not_detected	not_detected	not_detected	not_detected	not_detected	not_detected	not_detected	not_detected	not_detected
bedc5bbce452a28	4	negative	0	0	0
56f3cb0a841f513	17	negative	0	0	0
1972710e36a782a	19	negative	0	0	0
9f70607885f8089	5	negative	0	0	0
0db48a8b167bcf7	10	positive	0	0	0	1.03762	1.4814	-1.82384	0.347255	1.1422	0.966573	1.8374	-1.13537	-0.223767	0.387261	-0.835508	-0.454724	-0.377823	-0.978899		not_detected	not_detected	not_detected	not_detected	not_detected	not_detected		not_detected	not_detected	not_detected	not_detected	not_detected	not_detected	not_detected	not_detected	not_detected	not_detected	not_detected	-0.602697		0.0587543
8f2cc45d74f59cd	7	negative	0	0	0
f5dbbb2f23d4cb8	7	negative	0	0	0
cbc76371c36b4ee	15	negative	0	0	0
f8155794dc75f59	5	positive	0	0	0
d24deb36395cb7c	0	negative	0	0	0																																								negative	negative
6085d99a96b9698	7	negative	0	0	0	1.01473	0.541564	-0.140559	-0.55029	0.36646	2.22887	-1.44868	-0.715173	2.21991	0.230447	-0.203417	1.02746	1.48686	0.613318	-0.110364																			-2.54487	0.230425	-0.42409	-0.0121914	-0.0586259	0.503132
02bc564b1b54590	7	negative	0	0	0
7f4c1a1b30b7741	5	negative	0	0	0
9dfa5f6866ab58f	8	negative	0	0	0
7b992836f8f0944	11	negative	0	0	0
b29260c35bfae1d	19	negative	0	0	0
0e0e2311ddebc4d	11	negative	0	0	0
f8d6b832442ccb7	2	negative	0	0	0
de84f94d5e644ce	1	negative	0	0	0																not_detected	not_detected	not_detected	not_detected	detected	not_detected		not_detected	not_detected	not_detected	not_detected	not_detected	not_detected	not_detected	not_detected	not_detected	not_detected	not_detected
d988f7a09c752b5	5	negative	0	0	0
873326a2ed3a492	1	negative	0	0	0
388c5c9b813141e	11	negative	0	0	0
d12c7fe7e9e1e31	16	negative	0	0	0																not_detected	not_detected	not_detected	not_detected	not_detected	detected		not_detected	not_detected	not_detected	not_detected	not_detected	not_detected	not_detected	not_detected	not_detected	not_detected	not_detected
689802a344c96bb	12	negative	0	0	0
1ec87f54d66ed18	19	positive	0	0	0
894cdfea51a6eaa	9	negative	0	0	0																not_detected	not_detected	not_detected	not_detected	not_detected	not_detected		not_detected	not_detected	not_detected	not_detected	not_detected	not_detected	not_detected	not_detected	not_detected	not_detected	not_detected
db072f5b9116eae	16	negative	0	0	0
64fd1563a3439a4	10	positive	0	0	0																not_detected	not_detected	not_detected	not_detected	not_detected	not_detected		not_detected	not_detected	not_detected	not_detected	not_detected	not_detected	not_detected	not_detected	not_detected	not_detected	not_detected
448bf412256f414	14	negative	0	0	0
a3e56e5d988b50b	13	negative	0	0	0
c69c2635a852990	7	negative	0	0	0
78982c04920a74d	5	positive	0	0	0
0730e6cd59c0101	4	negative	0	0	0
2a7efe8cfb1faf8	14	negative	0	0	0																not_detected	not_detected	not_detected	not_detected	not_detected	not_detected		not_detected	not_detected	not_detected	not_detected	not_detected	not_detected	not_detected	not_detected	not_detected	not_detected	not_detected
8583c9e1d0c0559	9	negative	0	0	0																not_detected	not_detected	not_detected	not_detected	not_detected	not_detected		not_detected	not_detected	not_detected	not_detected	not_detected	not_detected	not_detected	not_detected	not_detected	not_detected	not_detected							negative	negative
d5e31b43999a3f1	7	negative	0	0	0																not_detected	not_detected	detected	not_detected	not_detected	not_detected		not_detected	not_detected	not_detected	not_detected	not_detected	not_detected	not_detected	not_detected	not_detected	not_detected	not_detected
c8a75a9b57977f0	5	negative	0	0	0																not_detected	not_detected	not_detected	not_detected	not_detected	not_detected		not_detected	not_detected	not_detected	not_detected	not_detected	not_detected	not_detected	not_detected	not_detected	not_detected	not_detected
51d9f4f0d6a1c71	0	negative	0	0	0																not_detected	not_detected	not_detected	not_detected	not_detected	detected		not_detected	not_detected	not_detected	not_detected	detected	not_detected	not_detected	not_detected	not_detected	not_detected	not_detected
fa72237c547cb87	18	negative	0	0	0
d822f5cd50da124	2	negative	0	0	0																																								negative	negative
abb1d801d464bd9	7	negative	0	0	0																not_detected	not_detected	not_detected	not_detected	not_detected	detected		not_detected	not_detected	not_detected	not_detected	not_detected	not_detected	not_detected	not_detected	not_detected	not_detected	not_detected
e946aac5eccf886	12	negative	0	0	0
551e5a3b7844a5f	6	negative	0	0	0																not_detected	not_detected	not_detected	not_detected	not_detected	not_detected		not_detected	not_detected	not_detected	not_detected	not_detected	not_detected	not_detected	not_detected	not_detected	not_detected	not_detected
cd8804bcf5de291	0	negative	0	0	0
1dd56cc7ca09e7b	5	negative	0	0	0
57be9f6752edc1e	9	negative	0	0	0	0.0762952	0.416252	-0.818896	-0.55029	-0.215342	0.898341	1.33951	-1.23556	-0.223767	1.11906	1.3136	0.546754	1.9596	-0.536617																				-1.64344		-0.346596				negative	negative
018b9dfc630abb8	15	negative	0	0	0																																								negative	negative
3e28c68edd312bc	2	negative	0	0	0
03021d2b37dd8b1	3	negative	0	0	0
6c4bef6dd8274a4	1	negative	0	0	0
0a1b5ebdc83319e	13	negative	0	0	0
2c7d66dc08d7c9b	11	negative	0	0	0
1ec4851659d7da9	2	negative	0	0	0
a468ba225ccb2b3	5	negative	0	0	0																not_detected	not_detected	not_detected	not_detected	not_detected	not_detected		not_detected	not_detected	not_detected	not_detected	not_detected	not_detected	not_detected	not_detected	not_detected	not_detected	not_detected
279aec401c172e3	5	negative	0	0	0	0.785841	0.541564	-0.994762	2.03015	1.21272	0.0624944	-0.652057	0.0278326	0.0816925	-1.18089	-0.414114	-0.975493	-0.246507	0.436405	-0.534346	not_detected	not_detected	not_detected	not_detected	not_detected	detected		not_detected	not_detected	not_detected	not_detected	not_detected	not_detected	not_detected	not_detected	not_detected	not_detected	not_detected	0.175814	1.49579	-0.521453	0.780411	0.188535	-0.215628
d061643ad918255	19	negative	0	0	0
43722b88ab5cf9a	6	negative	0	0	0																not_detected	not_detected	not_detected	not_detected	not_detected	not_detected		not_detected	detected	not_detected	not_detected	not_detected	not_detected	not_detected	not_detected	not_detected	not_detected	not_detected
a97a4ad23b564a1	7	negative	0	0	0
0fa6efb43c75162	5	negative	0	0	0
9af97d0cd5d8c64	19	negative	0	0	0
34b1de97de37241	4	positive	0	0	0																not_detected	not_detected	not_detected	not_detected	not_detected	not_detected		not_detected	not_detected	not_detected	not_detected	not_detected	not_detected	not_detected	not_detected	not_detected	not_detected	not_detected
b2e54b3ceb0d532	0	negative	0	0	0																																								negative	negative
4dc66a124786f8c	0	negative	0	0	0																																								negative	negative
fca36490e2678af	4	negative	0	0	0																not_detected	not_detected	not_detected	not_detected	not_detected	not_detected		not_detected	not_detected	not_detected	not_detected	not_detected	not_detected	not_detected	not_detected	not_detected	not_detected	not_detected
38cea35c469d681	18	negative	0	0	0																not_detected	not_detected	not_detected	not_detected	not_detected	not_detected		not_detected	not_detected	not_detected	not_detected	not_detected	not_detected	not_detected	not_detected	not_detected	not_detected	not_detected
1adbcba93b4424a	17	negative	0	0	0																not_detected	not_detected	not_detected	not_detected	not_detected	not_detected		not_detected	not_detected	not_detected	not_detected	not_detected	not_detected	not_detected	not_detected	not_detected	not_detected	not_detected
ff938ef7da81930	0	negative	0	0	0																																								negative	negative
de04812f88377cc	1	negative	0	0	0
15c78aa6cb0c7e4	2	negative	0	0	0																not_detected	not_detected	detected																						negative	negative
3bd5e69c6ec2727	4	negative	0	0	0
221a77949eac868	15	negative	0	0	0																not_detected	not_detected	not_detected	not_detected	not_detected	not_detected		not_detected	not_detected	not_detected	not_detected	not_detected	not_detected	not_detected	not_detected	not_detected	not_detected	not_detected
11bea6ea44bf85a	12	negative	0	0	0
ddc3d97dbaa9999	17	negative	0	0	0
2d9b9fb50a426d9	13	negative	0	0	0																not_detected	not_detected	not_detected	not_detected	not_detected	detected		not_detected	not_detected	not_detected	not_detected	not_detected	not_detected	not_detected	not_detected	not_detected	not_detected	not_detected
5541f42a107f084	17	negative	0	0	0
3ac9200f97df54d	15	negative	0	0	0																not_detected	not_detected	not_detected	not_detected	not_detected	detected		not_detected	not_detected	not_detected	not_detected	not_detected	not_detected	not_detected	not_detected	not_detected	not_detected	not_detected
6ce18a287364cce	11	negative	0	0	0
43c807645735a80	19	negative	0	0	0
55ad1f2d262ac55	5	positive	0	0	0
86de5d53946fdfc	6	negative	0	0	0
3b2692bd216736c	15	negative	0	0	0
01e9ec097c85377	14	positive	0	0	0
c78cf63a524d058	14	negative	0	0	0
78ec05facc99011	1	negative	0	0	0
2e30aea798a79c0	14	negative	0	0	0																not_detected	not_detected	not_detected	not_detected	not_detected	detected		not_detected	not_detected	not_detected	not_detected	not_detected	not_detected	not_detected	not_detected	not_detected	not_detected	not_detected
aa4232273cdb909	2	positive	0	0	0																not_detected	not_detected	detected	not_detected	not_detected	not_detected		not_detected	not_detected	not_detected	not_detected	not_detected	not_detected	not_detected	not_detected	not_detected	not_detected	not_detected
0eded5b5b84cb55	6	negative	0	0	0
fab965177b91e88	14	negative	0	0	0																																								negative	negative
19bd1d339b8ceb8	9	negative	0	0	0
11d33addc20b531	1	negative	0	0	0																																								negative	negative
9a18f66c6f1ce6f	2	negative	0	0	0	0.213626	0.416252	0.010183	-0.999063	0.41935	1.52096	0.841616	-0.186442	-0.223767	-0.0831831	0.723649	-0.514813	-0.771771	-1.15581																				-1.33204	0.453725		-1.25279					-0.448998	-0.394452	-0.375531
6ec2f1cb69d1616	4	negative	0	0	0
9d8e503faf48ddc	2	negative	0	0	0
dd207d1842d45ba	19	positive	0	0	0																not_detected	not_detected	not_detected	not_detected	not_detected	not_detected		not_detected	not_detected	not_detected	not_detected	not_detected	not_detected	not_detected	not_detected	not_detected	not_detected	not_detected
547b0c084a9fd40	16	negative	0	0	0
ccbff084994fa08	19	negative	0	0	0																not_detected	not_detected	not_detected	not_detected	not_detected	detected		not_detected	not_detected	not_detected	not_detected	not_detected	not_detected	not_detected	not_detected	not_detected	not_detected	not_detected
da291f01fd94d02	13	negative	0	0	0
04ffc6b0eeddb93	12	negative	0	0	0	-1.66324	-1.52608	-0.894267	0.347255	-1.71392	1.41861	0.144572	-0.517595	0.99807	0.544077	0.386534	0.546754	0.4626	-0.0943343	0.0107743	not_detected	not_detected	not_detected	not_detected	not_detected	not_detected		not_detected	not_detected	not_detected	not_detected	not_detected	not_detected	not_detected	not_detected	not_detected	not_detected	not_detected	-1.52871	0.00712461	-0.521453	-0.839255	-0.552949	-0.215628
cd5f2af976e60af	18	negative	0	0	0																not_detected	not_detected	not_detected	not_detected	not_detected	detected		not_detected	not_detected	not_detected	not_detected	not_detected	not_detected	not_detected	not_detected	not_detected	not_detected	not_detected
af3a9fb7871d00f	6	negative	0	0	0
79274b744805e76	17	negative	0	0	0
0f8e439179787b9	0	negative	0	0	0
49306cba785d0db	18	negative	0	0	0
1b6a203a2438f24	2	positive	0	0	0																																								negative	negative
6ea33c9445516e2	16	negative	0	0	0
a6972398c484617	15	negative	0	0	0
1f552cb3d58fe6c	9	positive	0	0	0
850e3dbd295c762	11	negative	0	0	0
abf6fe7344b87e8	16	negative	0	0	0
860ba7d8934e04c	1	negative	0	0	0	-2.02945	-1.90202	0.801577	-0.774677	-1.36132	-1.09746	0.0449914	3.31431	-1.14014	-1.02407	-0.835508	-1.17579	-1.27077	-0.359703																					-0.290609	-0.167765	-1.5974	-0.552949	-0.934388	negative	negative
a4194574ae7305d	10	negative	0	0	0
e860c6ef5f62352	0	negative	0	0	0																not_detected	not_detected	detected	not_detected	not_detected	not_detected		not_detected	not_detected	not_detected	not_detected	not_detected	not_detected	not_detected	not_detected	not_detected	not_detected	not_detected
4c1946767ade7a1	11	negative	0	0	0																not_detected	not_detected	not_detected	not_detected	not_detected	not_detected		not_detected	not_detected	not_detected	not_detected	not_detected	not_detected	not_detected	not_detected	not_detected	not_detected	not_detected
02f398cdd770389	15	negative	0	0	0
d77178858274f79	2	negative	0	0	0
d5b62f00f3aba02	11	negative	0	0	0																not_detected	not_detected	not_detected	not_detected	not_detected	not_detected		not_detected	not_detected	not_detected	not_detected	not_detected	not_detected	not_detected	not_detected	not_detected	not_detected	not_detected
bd22eafe4a3f5e2	13	negative	0	0	0																not_detected	not_detected	not_detected	not_detected	not_detected	not_detected		not_detected	not_detected	not_detected	not_detected	not_detected	not_detected	not_detected	not_detected	not_detected	not_detected	not_detected
2fad8f0e7efab06	8	negative	0	0	0
77f40dd4a648a42	0	negative	0	0	0																detected	not_detected	not_detected	not_detected	not_detected	not_detected		not_detected	not_detected	not_detected	not_detected	not_detected	not_detected	not_detected	not_detected	not_detected	not_detected	not_detected							negative	negative
9c35f9f6bd4c9c6	18	negative	0	0	0
34b65baf9c045ee	8	negative	0	0	0																not_detected	not_detected	not_detected	not_detected	not_detected	not_detected		not_detected	not_detected	not_detected	not_detected	not_detected	not_detected	not_detected	detected	not_detected	not_detected	not_detected
3c6782086b3aac3	13	negative	0	0	0																not_detected	not_detected	not_detected	not_detected	not_detected	not_detected		not_detected	not_detected	not_detected	not_detected	not_detected	not_detected	not_detected	not_detected	not_detected	not_detected	not_detected
6c43360b2f3e7f2	3	negative	0	0	0
fb99a46f47c9550	9	negative	0	0	0																																								negative	negative
cafffcc22690c47	3	negative	0	0	0																not_detected	not_detected	not_detected	not_detected	not_detected	detected		not_detected	not_detected	not_detected	not_detected	not_detected	not_detected	not_detected	not_detected	not_detected	not_detected	not_detected
eb9f43b8337f0d8	4	negative	0	0	0
10221231bfd39fb	12	negative	0	0	0																not_detected	not_detected	not_detected	not_detected	not_detected	detected		not_detected	not_detected	not_detected	not_detected	not_detected	not_detected	not_detected	not_detected	not_detected	not_detected	not_detected
78a41732558deae	12	negative	0	0	0																not_detected	not_detected	not_detected	not_detected	not_detected	detected		not_detected	not_detected	not_detected	not_detected	not_detected	not_detected	not_detected	not_detected	not_detected	not_detected	not_detected
3a70304baf8467f	12	negative	0	0	0	-0.129702	0.102972	-0.70584	-0.325903	-0.09193	-1.19128	0.941197	-0.292189	-0.223767	0.334989	-0.287696	-0.0941924	-0.482876	0.171035	0.162197																			1.43782	0.453725	-0.0763625	0.539184	-1.29443	0.503132	negative	negative	-0.0630925	-0.278326	-0.19584
1c7ce2c396bc771	14	positive	0	0	0																not_detected	not_detected	not_detected	not_detected	not_detected	not_detected		not_detected	not_detected	not_detected	not_detected	not_detected	not_detected	not_detected	not_detected	not_detected	not_detected	not_detected
10a4537bf58a3b5	6	positive	0	0	0																not_detected	not_detected	not_detected	not_detected	not_detected	not_detected		not_detected	not_detected	not_detected	not_detected	not_detected	not_detected	not_detected	not_detected	not_detected	not_detected	not_detected
3a03e27c88ad1e7	13	negative	0	0	0																not_detected	not_detected	not_detected	not_detected	not_detected	not_detected		not_detected	not_detected	detected	not_detected	not_detected	not_detected	not_detected	not_detected	not_detected	not_detected	not_detected
9472ca4c61a8e41	15	negative	0	0	0
cf0ab1a42a38fbf	15	negative	0	0	0
310ee2757151ed3	9	negative	0	0	0
eb565d321ef9c86	2	negative	0	0	0																not_detected	not_detected	not_detected	not_detected	not_detected	not_detected		not_detected	not_detected	not_detected	not_detected	not_detected	not_detected	not_detected	not_detected	not_detected	not_detected	not_detected
8c858f70a5b0eb6	4	negative	0	0	0
f73fd99bc62d4ce	4	negative	0	0	0																not_detected	not_detected	not_detected	not_detected	not_detected	detected		not_detected	not_detected	not_detected	not_detected	not_detected	not_detected	not_detected	not_detected	not_detected	not_detected	not_detected
773dc167295f96e	11	negative	0	0	0
4214301772c6411	12	negative	0	0	0
47290acf64374e3	0	negative	0	0	0
9d1bbc07d5119a8	5	negative	0	0	0
f3ca3cf12e595d4	1	negative	0	0	0
136cb5615c8c042	1	negative	0	0	0																																								negative	negative
16e2665a8f0b237	8	negative	0	0	0																not_detected	not_detected	not_detected	not_detected	not_detected	detected		not_detected	not_detected	not_detected	not_detected	not_detected	not_detected	not_detected	not_detected	not_detected	not_detected	not_detected
cf1776e6e2cbe54	18	negative	0	0	0
e94869d6c218c3b	18	negative	0	0	0
761ea145fe1c5e0	8	negative	0	0	0
ea99f61398ce324	11	negative	0	0	0	0.96895	0.854844	-0.781211	0.908221	0.948261	-0.218964	-0.154166	-0.370107	-0.223767	-0.292269	-0.203417	-0.214369	-0.115191	-0.0058775	-0.140648																			0.37249	-0.365042	1.08604	-0.701411	-0.80011	-0.215628	negative	negative
e6eaec3b8661e74	4	negative	0	0	0
cf2c6f9571f422a	8	negative	0	0	0
6ddc7124d0820d7	14	negative	0	0	0																not_detected	not_detected	not_detected	not_detected	not_detected	not_detected		not_detected	not_detected	not_detected	not_detected	not_detected	not_detected	not_detected	not_detected	not_detected	not_detected	not_detected
691e3bdf5882a0d	2	negative	0	0	0
6f601acba4dbf13	2	negative	0	0	0																not_detected	not_detected	not_detected	not_detected	not_detected	detected		not_detected	not_detected	not_detected	not_detected	not_detected	not_detected	not_detected	not_detected	not_detected	not_detected	not_detected
f569227a8b58360	15	negative	0	0	0
5a9e0100a285a12	0	negative	0	0	0																																								negative	negative
3a93f671e42c027	14	negative	0	0	0
a4dcfe101fa1ef4	14	negative	0	0	0	0.190738	0.353596	-0.617907	0.235063	0.0843743	0.932457	0.642463	0.178103	0.387152	0.439533	-0.161278	0.126132	0.410073	-0.0943343	0.131912																			-0.922295	0.304858	-0.296921	1.09056	-1.29443	0.143752	negative	negative
e2d82c2767e20d7	2	negative	0	0	0
394b4fbac0241d7	2	negative	0	0	0
261de8470ba530b	2	negative	0	0	0
6ad9eb9271206cb	15	negative	0	0	0
6fc153694e05ec7	15	negative	0	0	0
b46d70f4225a592	0	negative	0	0	0																																								negative	negative
1396235b5262a14	4	negative	0	0	0
f6c0b446ba597a8	5	negative	0	0	0
8de837f236b571f	4	positive	0	0	0
811d36166ff35ea	5	negative	0	0	0
e1d8676608abafd	6	negative	0	0	0
880754af68babd4	17	negative	0	0	0
746e02eff350f87	14	negative	0	0	0
30542f12d5b77b9	4	negative	0	0	0
6683898dc674df8	14	positive	0	0	0																not_detected	not_detected	not_detected	not_detected	not_detected	not_detected		not_detected	not_detected	not_detected	not_detected	not_detected	not_detected	not_detected	not_detected	not_detected	not_detected	not_detected
ffce5b6160dfbef	5	negative	0	0	0																not_detected	not_detected	not_detected	not_detected	not_detected	detected		not_detected	not_detected	not_detected	not_detected	not_detected	not_detected	not_detected	not_detected	not_detected	not_detected	not_detected
b52020822d90ae7	12	negative	0	0	0	0.16785	0.165628	-0.391795	-1.11126	-0.0214086	-1.33627	0.0449914	0.587174	0.387152	0.282719	-0.371974	0.306399	-0.377823	-1.24427	-0.0497947																			1.54435	0.528158	-0.455882	0.263496	-1.78876	0.143752	negative	negative
410d0731078f2c1	12	negative	0	0	0
ccce1027e2bac9a	14	positive	0	0	0																not_detected	not_detected	not_detected	not_detected	not_detected	detected		not_detected	not_detected	not_detected	not_detected	not_detected	not_detected	not_detected	not_detected	not_detected	not_detected	not_detected
48cfdd09989d7db	19	negative	0	0	0																not_detected	not_detected	not_detected	not_detected	not_detected	detected		not_detected	not_detected	not_detected	not_detected	not_detected	not_detected	not_detected	not_detected	not_detected	not_detected	not_detected
bd3362c238e7f44	5	negative	0	0	0	0.854507	1.35609	0.311666	-0.213711	1.42428	-0.176319	2.03656	1.26896	-0.529226	-0.239998	-0.540532	-1.23588	0.0949146	0.790231																				0.339711		-0.521453
9780b423f62bb85	6	negative	0	0	0
d5e0b616e50ed57	15	negative	0	0	0																not_detected	not_detected	not_detected	not_detected	not_detected	detected		not_detected	not_detected	not_detected	not_detected	not_detected	not_detected	not_detected	not_detected	not_detected	not_detected	not_detected							negative	negative
91929f0fd94e5b4	7	positive	0	0	0
1b5812fc2a03e1f	7	negative	0	0	0																not_detected	not_detected	not_detected	not_detected	not_detected	detected		not_detected	not_detected	not_detected	not_detected	not_detected	not_detected	not_detected	not_detected	not_detected	not_detected	not_detected
fd93c90e7acb3e1	9	negative	0	0	0																not_detected	not_detected	not_detected	not_detected	not_detected	not_detected		not_detected	not_detected	not_detected	not_detected	not_detected	not_detected	not_detected	detected	not_detected	not_detected	not_detected
3a61d3406c495b8	10	negative	0	0	0																not_detected	not_detected	not_detected	not_detected	not_detected	not_detected		not_detected	not_detected	not_detected	not_detected	not_detected	not_detected	not_detected	not_detected	not_detected	not_detected	not_detected
7e3dc0ccc42f0fb	4	negative	0	0	0
4a662f3cba463ca	4	negative	0	0	0
dcf8582ff3bf308	4	negative	0	0	0
515b03bffc86f9f	10	negative	0	0	0																																								negative	negative
20a665af212e3c6	15	negative	0	0	0
7c05d4dc8464ab3	0	negative	0	0	0																																								negative	negative
ed757fb624754dc	5	negative	0	0	0																																								negative	negative
85cf80625ac0cd4	14	negative	0	0	0
735385f039c10ab	0	negative	0	0	0
57a1de09f9a1692	13	negative	0	0	0
a90b17d8b2a65e1	1	negative	0	0	0
90e3289ab235ba6	6	negative	0	0	0
8de64b606a462e2	12	negative	0	0	0																not_detected	not_detected	not_detected	not_detected	not_detected	detected		not_detected	not_detected	not_detected	not_detected	not_detected	not_detected	not_detected	not_detected	not_detected	not_detected	not_detected
2444aa3f979cb1d	17	negative	0	0	0
fa1f502c1dc9cc7	18	negative	0	0	0
ff9a8f4c7c6a50f	9	negative	0	0	0	-0.198368	-0.33562	-0.655593	2.14235	-0.56795	1.20539	-0.552476	-0.729087	0.692611	0.439533	-0.119138	0.827167	-0.377823	0.613318		not_detected	not_detected	not_detected	not_detected	detected	not_detected		not_detected	not_detected	not_detected	not_detected	not_detected	not_detected	not_detected	not_detected	not_detected	not_detected	not_detected	-0.955075	-0.662776		-0.632489	0.188535	0.143752			-0.366304	-0.317035
0e6de122b02b2ed	17	negative	0	0	0
ccf821a6798e8ec	5	negative	0	0	0
10531c35569a8a7	2	negative	0	0	0																																								negative	negative
efc35ee2612a702	16	negative	0	0	0																not_detected	not_detected	not_detected	not_detected	not_detected	not_detected		not_detected	not_detected	not_detected	not_detected	not_detected	not_detected	not_detected	not_detected	not_detected	not_detected	not_detected
19d6bc855b292f6	2	negative	0	0	0																																								negative	negative
79693903aa17cf0	11	negative	0	0	0
32637da93df748a	10	negative	0	0	0
a7d5ddf2326a9f6	1	negative	0	0	0
c16dfab82c43048	0	negative	0	0	0
85bd203ac11ac88	6	negative	0	0	0	0.16785	-0.0849959	-0.165682	-0.662483	0.666176	-0.355429	-0.95079	-0.665083	0.0816925	-1.3377	0.217977	-1.05561	0.436336	0.0825793	-0.352639	not_detected	not_detected	detected	not_detected	not_detected	not_detected		not_detected	not_detected	not_detected	not_detected	not_detected	not_detected	not_detected	not_detected	not_detected	not_detected	not_detected	0.241373	0.00712461	-0.362492	0.987177	-0.552949	0.503132
0d3f8206d37f34d	12	negative	0	0	0																not_detected	not_detected	not_detected	not_detected	not_detected	detected		not_detected	not_detected	not_detected	not_detected	not_detected	not_detected	not_detected	not_detected	not_detected	not_detected	not_detected							negative	negative
b21591c515e66de	2	negative	0	0	0
0fa4befdfbef226	2	negative	0	0	0
d948c84d481578b	1	negative	0	0	0
ae7770f5124e973	19	negative	0	0	0
b8db02db0aec626	4	negative	0	0	0
faaeec393031e8d	15	negative	0	0	0																not_detected	not_detected	not_detected	not_detected	not_detected	not_detected		not_detected	not_detected	not_detected	not_detected	not_detected	not_detected	not_detected	not_detected	not_detected	not_detected	not_detected
2982175598001a0	5	negative	0	0	0
d88d1f02d425bd8	7	negative	0	0	0
6a6616e44c8827b	0	negative	0	0	0
18b1d67d8ad91a6	11	negative	0	0	0
abec1d0f02f2d52	4	negative	0	0	0
4c811c01723383b	16	negative	0	0	0
ee5244ccb140bcf	15	positive	0	0	0																not_detected	not_detected	not_detected	not_detected	not_detected	not_detected		not_detected	not_detected	not_detected	not_detected	not_detected	not_detected	not_detected	not_detected	not_detected	not_detected	not_detected
4475e8fd314a180	1	negative	0	0	1																not_detected	not_detected	not_detected	not_detected	not_detected	detected		not_detected	not_detected	not_detected	not_detected	not_detected	not_detected	not_detected	not_detected	not_detected	not_detected	not_detected
ed649b99f614a3a	11	negative	0	0	0																not_detected	not_detected	not_detected	not_detected	not_detected	not_detected		not_detected	not_detected	not_detected	not_detected	not_detected	not_detected	not_detected	not_detected	not_detected	not_detected	not_detected							negative	negative
3bb9000e8273f44	11	negative	0	0	0
5867aac3817ef04	3	negative	0	0	0																																								negative	negative
5586bf0d80afb70	16	positive	0	0	0																not_detected	not_detected	not_detected	not_detected	not_detected	not_detected		not_detected	not_detected	not_detected	not_detected	not_detected	not_detected	not_detected	not_detected	not_detected	not_detected	not_detected
58f287803b105d1	3	negative	0	0	0	-0.587474	-0.210308	-1.04501	-2.45757	-0.197712	-1.04628	1.43909	-1.2773	-0.223767	-0.0309113	-0.835508	-0.755167	2.14345	-0.536617																				0.585556						negative	negative
c17daca7b226057	14	negative	0	0	0																																								negative	negative
eb2d00d6d7e22b4	10	negative	0	0	0
f4dd9a52c7fa84a	5	negative	0	0	0
2f901095f53518e	4	negative	1	0	0	1.42672	0.980156	0.19861	-0.213711	1.40665	-0.739236	-1.24952	-0.578816	0.387152	-0.814985	-0.751229	-0.294488	2.19597	0.171035																				0.241373	0.155991	-0.314804	0.814872	0.435697	-0.215628	negative	negative
4af8b1cdf6b0387	1	negative	0	0	0																not_detected	not_detected	not_detected	not_detected	not_detected	not_detected		not_detected	not_detected	not_detected	not_detected	not_detected	not_detected	not_detected	detected	not_detected	not_detected	not_detected							negative	negative
2aa6c5ce5f7a41e	17	negative	0	0	0																not_detected	not_detected	not_detected	not_detected	not_detected	not_detected		not_detected	not_detected	not_detected	not_detected	not_detected	not_detected	not_detected	not_detected	not_detected	not_detected	not_detected
779f22d195f8c0b	2	negative	0	0	0																not_detected	not_detected	not_detected	not_detected	not_detected	detected		not_detected	not_detected	not_detected	not_detected	not_detected	not_detected	not_detected	not_detected	not_detected	not_detected	not_detected
4c5d16f2242d413	11	positive	0	0	0
6e26d5c1cf54163	0	negative	0	0	0																not_detected	not_detected	not_detected	not_detected	not_detected	detected		not_detected	not_detected	not_detected	not_detected	detected	not_detected	not_detected	not_detected	not_detected	not_detected	not_detected							negative	negative
26d06fd697a1b23	14	negative	0	0	0
075173a60022976	11	negative	0	0	0
ebe1af2d8c93ada	13	negative	0	0	0	0.442512	0.416252	-0.278739	0.235063	0.0314828	0.0539653	0.0449914	0.21428	-0.223767	0.648619	1.18718	0.70699	-0.0364015	-0.44816		not_detected	not_detected	not_detected	not_detected	detected	not_detected		not_detected	not_detected	not_detected	not_detected	not_detected	not_detected	not_detected	not_detected	not_detected	not_detected	not_detected	-0.201149	0.602592	-0.41018	0.229035					0.212554	-0.00736494	-0.184609
f196c712c59006e	8	negative	0	0	0
54b52fd0df198c4	18	negative	0	0	0
12e81116e46e010	11	negative	0	0	0
462dd14016e812c	13	negative	0	0	0
0a1b6c9aaf8d6cc	11	negative	0	0	0	0.854507	0.792188	0.688521	0.683835	0.683806	-0.449248	-0.0545852	0.172538	-0.834685	0.0736314	-0.793368	0.106103	-0.587929	-1.06736																				0.855986	0.528158		0.229035	0.682859	2.30003			-0.476563	-0.549287
a534bb681d4f51a	15	negative	0	0	0
79b4ad0a02b4311	10	negative	0	0	0
9de2bb80b02ebee	1	negative	0	0	0																																								negative	negative
0fdd724e1924a41	3	negative	0	0	0																																								negative	negative
ea11b97b8408508	16	negative	0	0	0
c79a04d5a8fa373	14	negative	0	0	0
5a6b7b781e24a83	3	negative	0	0	0																																								negative	negative
0b287ca6b7f6fd8	9	negative	0	0	0
2800daa2454f4ae	15	negative	0	0	0
1441e07878b84cc	12	negative	0	0	0	-0.358588	-0.147652	1.04025	-1.33564	-0.250603	0.343953	0.74204	-0.428545	-0.223767	0.178175	0.470813	-0.19434	-0.299034	-0.18279																				-0.258513						negative	negative
dc00f87e8d11175	2	negative	0	0	0
b9a698635fced54	5	positive	0	0	0
f8bbad2ffd6f765	9	negative	0	0	0																																								negative	negative
166171d385056ec	12	negative	0	0	0
b7ff8644809925d	9	negative	0	0	0
c5ee219883d70c7	17	negative	0	0	0
b66ba801e165034	7	negative	0	0	0
ce2cff13d735c48	15	positive	0	0	0																																				-0.215453
0161b6af50624fd	2	positive	0	0	0
0c9f4ae61936cd6	7	negative	0	0	0
3f60088f7ad7e8e	3	negative	0	0	0
86bf9e796151f76	9	negative	0	0	0
7483b34552e28c2	16	negative	0	0	0	-0.679027	-0.711556	-1.12038	0.0106766	-0.56795	-0.278667	-0.253742	-1.41644	-1.14014	-0.239998	-0.245556	-0.134251	0.567652	0.613318	-0.261786																			0.249567	-1.48154	-0.195583	-0.563567	0.435697	-0.575008	negative	negative
a5f8c3a6348705b	5	negative	0	0	0
e42c8c366fee0d3	4	negative	0	0	0	0.602732	0.60422	0.412161	0.122869	1.07167	1.58919	0.144572	-0.128004	2.21991	-0.867257	2.40922	-1.03558	-0.509139	-0.625073																				-1.81553		-0.473765						5.39471	1.6184	1.83692
3e3bec64de288d2	9	negative	0	0	0
5a5a6ee2df2f896	13	negative	0	0	0	-0.450142	-0.460932	0.977442	-1.67222	-0.656101	-0.210435	-0.154166	0.00557033	-0.529226	0.387261	-0.119138	0.526723	-0.614192	-0.625073		not_detected	not_detected	not_detected	not_detected	not_detected	detected		not_detected	not_detected	not_detected	not_detected	not_detected	not_detected	not_detected	not_detected	not_detected	not_detected	not_detected	0.511802	-0.365042		-1.32171	-0.552949	-0.575008
70d814e3170ad3f	1	negative	0	0	0
fb532928955c4bf	11	negative	0	0	0	0.785841	1.16812	-0.00237881	0.908221	0.913001	-0.184848	1.53866	0.325591	0.0816925	0.282719	-0.540532	-0.454724	-0.115191	-0.44816		not_detected	not_detected	not_detected	not_detected	not_detected	not_detected		not_detected	not_detected	not_detected	not_detected	not_detected	not_detected	not_detected	not_detected	not_detected	not_detected	not_detected	0.380685		0.913169
af0588a33a085ef	6	negative	0	0	0
07edb2faf4d7d4b	3	positive	0	0	0
f34b99f344d9dc2	10	negative	0	0	0	0.991838	0.666876	-0.454604	-0.213711	0.860109	-0.952462	-0.95079	0.247673	0.692611	-0.449085	-0.456253	-0.0140739	-0.798034	-0.713529		not_detected	not_detected	not_detected	not_detected	not_detected	not_detected		not_detected	not_detected	not_detected	not_detected	not_detected	not_detected	not_detected	not_detected	not_detected	not_detected	not_detected	1.3149	-0.0673088	-0.459856	0.470262	-0.552949	1.22189	negative	negative	-0.256045	-0.355744	-0.285685
4d9d51aa2253bfe	14	negative	0	0	0
4f39da360199396	8	negative	0	0	0
147f0827fe0e535	11	negative	0	0	0
f29df5faa14cbd2	12	negative	0	0	0
c9e6bc54e85744e	0	negative	0	0	0
695a409e4e37720	15	positive	0	0	0
25e8cfdb2177312	14	negative	0	0	0
4c4bd345fb028f6	5	negative	0	0	0
c444ccef19887cd	16	negative	0	0	0																not_detected	not_detected	not_detected	not_detected	not_detected	not_detected		not_detected	not_detected	not_detected	not_detected	not_detected	not_detected	not_detected	not_detected	not_detected	not_detected	not_detected
e47e279ff2dbb84	5	negative	0	0	0
da671e8639c0120	18	negative	0	0	0
034c3a5b952aa78	11	negative	0	0	0																not_detected	not_detected	not_detected	not_detected	not_detected	not_detected		not_detected	detected	not_detected	not_detected	not_detected	not_detected	not_detected	not_detected	not_detected	not_detected	not_detected
1ad8b3fd21aaa2c	0	negative	0	0	0																not_detected	not_detected	not_detected	not_detected	not_detected	detected		not_detected	not_detected	not_detected	not_detected	not_detected	not_detected	not_detected	not_detected	not_detected	not_detected	not_detected
29c156b2773ebe3	5	negative	0	0	0																not_detected	not_detected	not_detected	not_detected	not_detected	not_detected		not_detected	not_detected	not_detected	not_detected	not_detected	not_detected	not_detected	not_detected	not_detected	not_detected	not_detected							negative	negative
e6549d51fa987bd	5	negative	0	0	0	0.305181	0.353596	-0.492289	-0.774677	0.190156	-1.76272	0.244149	-0.158615	0.0816925	0.230447	-0.329835	0.106103	-0.798034	-0.713529	-0.352639																			2.08521	0.155991	0.293222	-0.632489	-0.0586259	0.862512	positive	negative
5ff8be33926a033	4	negative	0	0	0
19559d347073723	15	negative	0	0	0
ab3f5c45b6f8747	0	negative	0	0	0																not_detected	not_detected	not_detected	not_detected	not_detected	detected		not_detected	not_detected	not_detected	not_detected	not_detected	not_detected	not_detected	not_detected	not_detected	not_detected	not_detected
52b9ec515077973	13	negative	0	0	0
fdcb78aa9d7205d	11	negative	0	0	0
c32969ba30487e2	1	negative	0	0	0																																								negative	negative
2272bf0cdfcce1e	0	negative	0	0	0																not_detected	not_detected	not_detected	not_detected	not_detected	detected		not_detected	not_detected	not_detected	not_detected	detected	not_detected	not_detected	not_detected	not_detected	not_detected	not_detected
62a79d811b0d35b	11	negative	0	0	0																																								negative	negative
ff64db76c9672b2	14	negative	0	0	0
5364ef94bf4d2ce	14	negative	0	0	0
32b0a88f83c4e3d	4	negative	0	0	0
9b3ac6abc56b4d5	4	negative	0	0	0
2e512eda05931e0	4	negative	0	0	0
2b42484c22c2b1c	0	negative	0	0	0																																								negative	negative
4af38369499a27a	9	negative	0	0	0
ad5435f4ddcb322	4	negative	0	0	0
fd95bc07bf0f03e	0	negative	0	0	0																detected	not_detected	not_detected	not_detected	not_detected	not_detected		not_detected	not_detected	not_detected	not_detected	not_detected	not_detected	not_detected	not_detected	not_detected	not_detected	not_detected
873b8bb706ba784	17	negative	0	0	0
821cd89418af525	3	negative	0	0	0
73d4b59188f70fb	15	negative	0	0	0																not_detected	not_detected	not_detected	not_detected	not_detected	not_detected		not_detected	not_detected	detected	not_detected	not_detected	not_detected	not_detected	not_detected	not_detected	not_detected	not_detected
7a203dd7c10f801	2	negative	0	0	0
36768d1ef927349	11	negative	0	0	0																not_detected	not_detected	not_detected	not_detected	not_detected	not_detected		not_detected	not_detected	not_detected	not_detected	not_detected	not_detected	not_detected	not_detected	not_detected	not_detected	not_detected
e588fb76fd6f1ac	17	negative	0	0	0
6b9d4a84f77af35	0	negative	0	0	0																																								negative	negative
aca1bed3195bd53	11	negative	0	0	0																not_detected	not_detected	not_detected	not_detected	not_detected	detected		not_detected	not_detected	not_detected	not_detected	not_detected	not_detected	not_detected	not_detected	not_detected	not_detected	not_detected
5ba48fd9d5dd05e	19	negative	0	0	0
2939ce270505d11	12	negative	0	0	0
54d0a273ab07276	1	negative	0	0	0																																								negative	negative
dac3d3c3fff31b8	19	negative	0	0	0																not_detected	not_detected	not_detected	not_detected	not_detected	not_detected		not_detected	not_detected	not_detected	not_detected	not_detected	not_detected	not_detected	not_detected	not_detected	not_detected	not_detected
c9c2cdeb6b95cfb	5	negative	0	0	0
03af8a0bd740887	5	negative	0	0	0
c218598cf7edb7b	3	negative	0	0	0
a3b083f937fd0ff	7	negative	0	0	0	0.0305179	-0.272964	0.148363	1.46919	0.260678	0.139256	-1.14995	0.459165	0.0816925	-0.971801	-0.329835	-0.514813	-0.850561	0.0825793																				0.249567						negative	negative
b21e5c33cf4a254	13	negative	0	0	0
e0e9b17760610e9	15	negative	0	0	0
c20d89c91a7e9f7	14	negative	0	0	0	0.854507	0.60422	-0.0400642	-0.213711	0.666176	0.625411	-0.652057	-0.317234	-0.223767	-0.187727	-0.456253	0.126132	-0.482876	0.0825793		not_detected	not_detected	not_detected	not_detected	not_detected	detected		not_detected	not_detected	not_detected	not_detected	not_detected	not_detected	not_detected	not_detected	not_detected	not_detected	not_detected	-0.274903	-0.0673088	-0.133986	0.711489	1.6715	-0.215628			0.405507	0.0313438	1.69092
f6fc38f1e78ba32	0	negative	0	0	0																not_detected	not_detected	not_detected	not_detected	not_detected	detected		not_detected	not_detected	not_detected	not_detected	not_detected	not_detected	not_detected	not_detected	not_detected	not_detected	not_detected							negative	negative
1ab0641948bf897	0	negative	0	0	0
9bedb87b89545c9	9	negative	0	0	0
532a8453799c1e6	4	negative	0	0	0
cc5f6d3fae08694	6	negative	0	0	0																not_detected	not_detected	not_detected	not_detected	not_detected	not_detected		not_detected	not_detected	not_detected	not_detected	not_detected	not_detected	not_detected	not_detected	not_detected	not_detected	not_detected
35196d014d27deb	9	negative	0	0	0
9009e8409a89f69	7	negative	0	0	0
44674a375cfe7d4	12	negative	0	0	0
e55254d0ac17e7c	8	negative	0	0	0
5d4518cea01c7cf	6	negative	0	0	0
7e84a4d47278b3c	15	negative	0	0	0
0692fcdf9863763	5	positive	0	0	0
ce2f6ac73613016	19	negative	0	0	0
9de19ea0c860d4d	9	negative	0	0	0
548482d2eadcd05	16	negative	0	0	0																																								negative	negative
66342a96fc1f90b	14	positive	0	0	1	1.31228	1.60672	-1.68566	1.2448	1.54769	0.386598	1.33951	-0.445242	-0.223767	-0.0831831	-0.751229	-0.715108	-0.141454	-0.978899	-0.29207	not_detected	not_detected	not_detected	not_detected	not_detected	not_detected		not_detected	not_detected	not_detected	not_detected	not_detected	not_detected	not_detected	not_detected	not_detected	not_detected	not_detected	-0.0946162	-0.365042	-0.0803365	0.918255	-1.54159	-0.215628
67df81c9eb9cbe6	7	negative	0	0	0
9ada73f8dd2da33	7	negative	0	0	0
455e1f34eefc795	6	negative	0	0	0
e058708b4a220d2	11	negative	0	0	0
d1a7ad987ec3a15	0	negative	0	0	0
c2852f21c195d2f	6	negative	0	0	0
47a1e04238b468a	4	positive	0	0	0
1d73e5194789fe5	6	negative	0	0	0
84c92695f4bc587	14	negative	0	0	0
13b7dce81208784	11	negative	0	0	0
8b55fa5d97bd9c7	11	negative	0	0	0																																								negative	negative
6128102622bdd8d	5	negative	0	0	0																not_detected	not_detected	not_detected	not_detected	not_detected	not_detected		not_detected	not_detected	not_detected	not_detected	not_detected	not_detected	not_detected	not_detected	not_detected	not_detected	not_detected
107fdbeb8f037f8	2	negative	0	0	0
4619fa90cce9719	2	negative	0	0	0
5fea2fcd18da716	6	negative	0	0	0
32abddb64c6e4b3	14	negative	0	0	0
133895021bc5d39	13	negative	0	0	0
db65b10e6a84e6a	17	negative	0	0	0
d165624344869cb	17	negative	0	0	0	0.556955	0.040316	-0.303862	0.459449	0.40172	-0.43219	-1.74742	0.0333981	-0.529226	-0.710443	-0.371974	0.126132	-0.325297	0.436405	-0.716053	not_detected	not_detected	not_detected	not_detected	not_detected	not_detected		not_detected	detected	not_detected	not_detected	not_detected	not_detected	not_detected	not_detected	not_detected	not_detected	not_detected	0.683894	0.00712461	-0.418129	0.366879	0.435697	0.143752			0.102296	-0.200909
fbab36af64f01ad	4	negative	0	0	0																not_detected	not_detected	not_detected	not_detected	not_detected	not_detected		not_detected	not_detected	not_detected	not_detected	not_detected	not_detected	not_detected	not_detected	not_detected	not_detected	not_detected
791a5b9e9bf5c21	4	negative	0	0	0	0.442512	0.917499	-0.0777497	-0.325903	0.295938	-0.0739703	1.93698	-0.879358	-1.14014	1.01452	-0.414114	0.146163	4.50713	-0.44816	-0.29207	not_detected	not_detected	detected	not_detected	not_detected	not_detected		not_detected	not_detected	not_detected	not_detected	not_detected	not_detected	not_detected	not_detected	not_detected	not_detected	not_detected		-0.588343	-0.402232	0.263496	-1.29443	-1.29377
5228586b2c03f85	15	negative	0	0	0																not_detected	not_detected	not_detected	not_detected	not_detected	not_detected		not_detected	not_detected	detected	not_detected	not_detected	not_detected	not_detected	not_detected	not_detected	not_detected	not_detected
f35cdf35c17e502	16	negative	0	0	0
0ac4070b4a7d231	5	negative	0	0	0
e554d75a9cbd5a4	14	negative	0	0	0
65110031bbe926f	19	negative	0	0	0
89afe9dda73ab9a	16	negative	0	0	0
e16efc32839655a	19	negative	0	0	0
4fff65ce7755e1d	4	negative	0	0	0
32fcd2c4ba5e283	16	negative	0	0	0
9c1f6edba249af6	11	negative	0	0	0
15e96beeae631ab	1	negative	0	0	0
[truncated: 3,645 more rows]
[truncated: 61 more columns]
